# Supplementary material for: 5-Hydroxymethylcytosine-mediated active demethylation is required for mammalian neuronal differentiation and function
Source: eLife. 2021 Dec 17;10:e66973. doi: 10.7554/eLife.66973 (PMC8683082; doi:10.7554/eLife.66973)
Supplement: Supplementary file 1. [file elife-66973-supp1.xlsx]

## Sheet: pc_p0Ad_filtered
SYMBOL	baseMean	log2FoldChange	lfcSE	stat	pvalue	padj	enriched
Hes3	6304.67	-12.1629	0.589454	-16.4502	8.36173e-61	2.63448e-58	up in Adult
D5Ertd579e	11895.3	-10.7692	0.437113	-24.2553	5.81549e-130	1.72232e-126	up in Adult
Atp2a3	2915.96	-9.27753	0.514398	-17.2447	1.22589e-66	5.50092e-64	up in Adult
Zfp934	168.201	-9.17999	1.02501	-7.348	2.01187e-13	4.54143e-12	up in Adult
Chst8	1554.5	-8.72382	0.435429	-19.4188	5.35212e-84	4.40301e-81	up in Adult
Gemin4	66.1267	-8.45247	1.07249	-6.6454	3.02385e-11	5.34334e-10	up in Adult
Fam83d	145.541	-8.42932	0.89186	-7.34453	2.0649e-13	4.65404e-12	up in Adult
Csta1	296.362	-8.3536	0.765888	-8.40386	4.32028e-17	1.34684e-15	up in Adult
Mphosph8	67.3454	-7.94153	1.07764	-6.29111	3.15212e-10	4.903e-09	up in Adult
2410124H12Rik	753.958	-7.82782	0.658206	-11.5054	1.23945e-30	8.99693e-29	up in Adult
Pigk	190.247	-7.81706	0.861576	-7.04242	1.88934e-12	3.82728e-11	up in Adult
Scn4b	158.926	-7.79844	0.784047	-7.80845	5.78958e-15	1.49907e-13	up in Adult
Phf12	55.7082	-7.79592	1.09267	-6.12274	9.19773e-10	1.34452e-08	up in Adult
Myo5a	97.7718	-7.78577	0.907629	-6.1143	9.69835e-10	1.41074e-08	up in Adult
Pih1h3b	263	-7.73639	0.684942	-10.205	1.88261e-24	9.88573e-23	up in Adult
9230117E06Rik	59.6589	-7.73567	1.09093	-6.09178	1.11664e-09	1.60849e-08	up in Adult
Ksr2	1826.49	-7.71802	0.583289	-13.09	3.75388e-39	4.14832e-37	up in Adult
Malat1	529402	-7.47739	0.222839	-33.5534	8.02217e-247	1.18792e-242	up in Adult
Fat4	80.9821	-7.40077	0.972168	-5.65777	1.53355e-08	1.86904e-07	up in Adult
Nap1l5	42.4353	-7.09183	1.13667	-5.45546	4.88462e-08	5.43029e-07	up in Adult
Lcp1	197.174	-7.0039	0.571108	-11.5711	5.77042e-31	4.23012e-29	up in Adult
Slc24a2	222.7	-6.94114	0.596004	-11.0693	1.76772e-28	1.15825e-26	up in Adult
Gm42788	75.5854	-6.89245	0.929822	-6.16425	7.08193e-10	1.04556e-08	up in Adult
Ppp1r17	977.125	-6.82717	0.449886	-14.9557	1.42971e-50	2.94043e-48	up in Adult
Sox5os3	87.8065	-6.78894	0.979059	-5.90523	3.52145e-09	4.70857e-08	up in Adult
Cfap161	89.3313	-6.77535	0.773031	-7.57372	3.62681e-14	8.67621e-13	up in Adult
Kcng4	150.36	-6.76274	0.700852	-8.08913	6.0092e-16	1.70795e-14	up in Adult
Gng13	115.995	-6.75783	0.913403	-5.54075	3.01175e-08	3.46258e-07	up in Adult
Tuba8	441.819	-6.73021	0.484339	-13.3913	6.80047e-41	8.1871e-39	up in Adult
Gm10649	1039.6	-6.65092	0.421557	-15.6467	3.50095e-55	8.93828e-53	up in Adult
4930414N06Rik	95.8879	-6.51426	0.930938	-6.30355	2.90903e-10	4.54398e-09	up in Adult
Hnrnpul1	29.5284	-6.4894	1.17356	-4.90132	9.51969e-07	8.64832e-06	up in Adult
Washc2	22328.8	-6.45365	0.393412	-16.3993	1.93414e-60	5.96682e-58	up in Adult
Corin	1608.52	-6.43351	0.365647	-17.5153	1.09594e-68	5.79596e-66	up in Adult
Gm12359	43.8914	-6.42911	1.04376	-5.5251	3.29289e-08	3.76825e-07	up in Adult
Stk17b	1005.92	-6.42614	0.373259	-17.0675	2.59095e-65	1.06575e-62	up in Adult
Itk	63.964	-6.42393	0.884899	-6.47871	9.25121e-11	1.52552e-09	up in Adult
Klra1	24.2085	-6.34587	1.20355	-4.67995	2.86946e-06	2.39385e-05	up in Adult
Icmt	662.423	-6.31713	0.44451	-14.0336	9.70614e-45	1.4518e-42	up in Adult
Ciart	69.2313	-6.28401	0.942303	-5.71274	1.11171e-08	1.3799e-07	up in Adult
Pcdh20	26.5024	-6.18564	1.10191	-5.03664	4.73782e-07	4.49441e-06	up in Adult
Tnfrsf11b	35.411	-6.16394	1.0625	-4.58034	4.64213e-06	3.70171e-05	up in Adult
Spag5	252.851	-6.1584	0.528492	-11.043	2.37048e-28	1.54635e-26	up in Adult
Lmcd1	65.9086	-6.07236	0.854015	-5.92304	3.16053e-09	4.24693e-08	up in Adult
4930404I05Rik	2207.11	-6.02106	1.07991	-5.51998	3.39033e-08	3.87078e-07	up in Adult
Pum1	105.775	-6.00199	1.10891	-4.72614	2.28833e-06	1.94857e-05	up in Adult
Atp6ap1l	324.595	-5.98698	0.446417	-13.1617	1.45696e-39	1.65959e-37	up in Adult
1500009C09Rik	48.0055	-5.96853	1.01251	-5.27329	1.34e-07	1.39541e-06	up in Adult
Plekhd1	12528.5	-5.95742	0.367827	-16.194	5.56003e-59	1.61437e-56	up in Adult
Cep76	1977.95	-5.93087	0.376049	-15.7408	7.94881e-56	2.10189e-53	up in Adult
Fam107b	5185.44	-5.89548	0.381862	-15.4223	1.15862e-53	2.68076e-51	up in Adult
Def6	112.233	-5.79978	0.823844	-6.74949	1.48368e-11	2.7124e-10	up in Adult
Atp13a4	453.44	-5.73371	0.462462	-12.3503	4.85281e-35	4.35518e-33	up in Adult
Tnfaip2	27.8346	-5.71289	1.22182	-4.27723	1.89233e-05	0.000132678	up in Adult
Aff1	4731.82	-5.62882	0.348842	-16.1246	1.71455e-58	4.8825e-56	up in Adult
Pde9a	35396.3	-5.62753	0.27795	-20.2446	3.9632e-91	3.91247e-88	up in Adult
Zrsr1	4830.54	-5.58235	0.564401	-9.8766	5.25868e-23	2.5365e-21	up in Adult
Gpr37l1	43.2124	-5.58072	1.08047	-4.32593	1.51891e-05	0.000108815	up in Adult
Kctd12	170.624	-5.54135	0.514398	-10.5163	7.26479e-26	4.23532e-24	up in Adult
Exoc6	43.1088	-5.54092	1.07559	-4.83056	1.36148e-06	1.20076e-05	up in Adult
Tbx1	22.7339	-5.54041	1.09029	-4.70169	2.58012e-06	2.1659e-05	up in Adult
Prss48	70.0331	-5.53296	1.05135	-4.93155	8.15809e-07	7.48018e-06	up in Adult
Dmgdh	165.141	-5.52191	0.565042	-9.57805	9.88934e-22	4.34544e-20	up in Adult
Rgs8	23685.3	-5.50318	0.300614	-18.3055	7.47908e-75	4.81522e-72	up in Adult
Hrh3	115.97	-5.4956	0.864802	-4.73755	2.16312e-06	1.85153e-05	up in Adult
Plppr5	862.817	-5.48456	0.370308	-14.7647	2.47301e-49	4.57755e-47	up in Adult
4933438K21Rik	17.9975	-5.44446	1.24122	-3.95588	7.62524e-05	0.000468137	up in Adult
Fbxw18	57.3381	-5.37449	0.785756	-6.48086	9.1204e-11	1.50563e-09	up in Adult
Cxcl17	17.7676	-5.37063	1.24645	-3.89095	9.98532e-05	0.0005955	up in Adult
Dync1i1	5905.78	-5.35193	0.293358	-18.2362	2.66191e-74	1.6424e-71	up in Adult
Ell2	42.4518	-5.329	1.0164	-4.8328	1.34627e-06	1.18921e-05	up in Adult
Sv2c	787.314	-5.32702	0.518586	-10.2322	1.42248e-24	7.57703e-23	up in Adult
Gm19897	17.7887	-5.32305	1.25017	-3.84898	0.00011861	0.000693122	up in Adult
1190002N15Rik	1117.77	-5.30283	0.353306	-14.9777	1.02704e-50	2.14202e-48	up in Adult
Rasgrp1	308.782	-5.27344	0.702413	-7.4265	1.1151e-13	2.56006e-12	up in Adult
Pttg1	94.9307	-5.26596	0.907766	-5.47753	4.31302e-08	4.84209e-07	up in Adult
2900005J15Rik	51.7786	-5.26311	0.849124	-5.83663	5.32678e-09	6.98043e-08	up in Adult
4930488L21Rik	80.4232	-5.24345	1.0437	-4.76322	1.90528e-06	1.63936e-05	up in Adult
Mlph	61.4808	-5.1928	0.776631	-6.34389	2.2403e-10	3.53672e-09	up in Adult
Hapln4	175.776	-5.18968	0.742924	-6.84463	7.66721e-12	1.44816e-10	up in Adult
Csn1s2a	29.7105	-5.18107	1.06588	-4.32255	1.54236e-05	0.000110175	up in Adult
Col18a1	3718.53	-5.16577	0.302065	-17.0933	1.6657e-65	7.25464e-63	up in Adult
Pkp3	79.5369	-5.13762	0.769042	-6.50785	7.62348e-11	1.27127e-09	up in Adult
A730006G06Rik	87.6876	-5.11455	0.655543	-7.56989	3.73529e-14	8.90696e-13	up in Adult
Sycp1	2613.77	-5.07724	0.33814	-15.0049	6.82283e-51	1.44332e-48	up in Adult
Ctcflos	58.5901	-5.06696	0.962183	-5.06499	4.08427e-07	3.92726e-06	up in Adult
Etl4	18599.7	-5.0453	0.303598	-16.6137	5.54614e-62	2.0031e-59	up in Adult
Nptx1	376.092	-5.02421	0.651697	-7.66912	1.73186e-14	4.28852e-13	up in Adult
B230206H07Rik	104.307	-4.98459	0.739255	-6.44683	1.14217e-10	1.86475e-09	up in Adult
Ano5	245.798	-4.96469	0.507289	-9.71385	2.63198e-22	1.19921e-20	up in Adult
Clec2h	42.8211	-4.95529	0.861598	-4.93987	7.81728e-07	7.19442e-06	up in Adult
Hmgn5	37.695	-4.94389	1.01483	-4.53292	5.81744e-06	4.52916e-05	up in Adult
Gm12185	51.4457	-4.94334	0.794207	-6.05326	1.41948e-09	2.01303e-08	up in Adult
Spx	52.2669	-4.88195	0.860345	-5.4458	5.15721e-08	5.6991e-07	up in Adult
Fahd1	14.9914	-4.8814	1.16775	-4.02527	5.69097e-05	0.000357994	up in Adult
Trim43c	45.183	-4.8728	1.00183	-4.55958	5.12567e-06	4.04109e-05	up in Adult
4933404G15Rik	30.4886	-4.86917	0.983611	-4.55938	5.13051e-06	4.04109e-05	up in Adult
Cpeb1	3298.37	-4.81789	0.37484	-12.8484	8.78437e-38	8.97096e-36	up in Adult
Colq	176.854	-4.80851	0.568736	-8.17515	2.955e-16	8.6137e-15	up in Adult
Sat1	165.738	-4.79073	0.483743	-9.80235	1.09997e-22	5.13827e-21	up in Adult
9330102E08Rik	19.7053	-4.76893	1.04538	-3.81294	0.000137322	0.000790923	up in Adult
Fam69c	131.341	-4.75255	0.810298	-5.79976	6.64114e-09	8.52923e-08	up in Adult
Asb11	22.5305	-4.75087	1.23346	-3.84795	0.00011911	0.000695768	up in Adult
Gpr63	4182.43	-4.75006	0.264062	-17.9826	2.66622e-72	1.51852e-69	up in Adult
4930529K09Rik	76.3876	-4.74351	0.86435	-5.39337	6.91474e-08	7.54866e-07	up in Adult
Tbata	18.4324	-4.74046	1.09989	-4.00397	6.22881e-05	0.000388854	up in Adult
Pcdha11	69.3875	-4.72412	0.97928	-4.66539	3.08031e-06	2.55393e-05	up in Adult
Cep72	283.821	-4.69704	0.383822	-12.1583	5.1797e-34	4.56553e-32	up in Adult
Grin2a	559.014	-4.69114	0.373285	-12.5368	4.69587e-36	4.31904e-34	up in Adult
Bcan	633.014	-4.68448	0.406989	-11.3966	4.34719e-30	3.05086e-28	up in Adult
Hey2	46.4992	-4.68388	0.865589	-5.15303	2.56304e-07	2.54722e-06	up in Adult
Htra1	668.054	-4.67976	0.32681	-14.2435	4.92278e-46	7.75494e-44	up in Adult
Zbtb46	1614.07	-4.65755	0.534472	-8.70835	3.08333e-18	1.05446e-16	up in Adult
Dytn	45.7638	-4.65565	0.802696	-5.57829	2.42892e-08	2.86593e-07	up in Adult
Amy2a5	12.3344	-4.63286	1.28446	-3.29653	0.000978876	0.00451427	up in Adult
Rbm3	145.582	-4.62585	0.582181	-7.87144	3.5059e-15	9.35412e-14	up in Adult
Ryr1	7144.36	-4.61598	0.35598	-12.9665	1.89486e-38	2.01864e-36	up in Adult
Gm8013	21.3008	-4.60686	1.12934	-3.66652	0.000245873	0.00133219	up in Adult
Hist1h2af	12.5321	-4.5956	1.28179	-3.2746	0.00105811	0.00482406	up in Adult
Procr	17.354	-4.59323	1.11041	-3.55205	0.000382242	0.00196689	up in Adult
Gm16793	11.5315	-4.58661	1.19674	-3.72427	0.000195878	0.00108839	up in Adult
Pgbd5	6304.32	-4.58325	0.338085	-13.5534	7.56891e-42	9.57952e-40	up in Adult
Sgpp2	343.972	-4.58138	0.46453	-9.82579	8.71886e-23	4.12488e-21	up in Adult
Dlx4os	589.411	-4.56607	0.517401	-8.73384	2.46174e-18	8.53711e-17	up in Adult
Gm20319	231.003	-4.56533	0.418029	-10.8558	1.87159e-27	1.15477e-25	up in Adult
6030408B16Rik	41.8216	-4.54237	0.863243	-5.07099	3.95761e-07	3.8129e-06	up in Adult
Dbx1	25.1583	-4.51884	1.07438	-3.90157	9.55714e-05	0.000572732	up in Adult
Slirp	67.3233	-4.51476	0.620756	-7.12154	1.06726e-12	2.23221e-11	up in Adult
Reep4	38.8396	-4.51435	0.884908	-4.89198	9.98249e-07	9.02447e-06	up in Adult
Car7	265.689	-4.50473	0.440378	-10.1659	2.81484e-24	1.45742e-22	up in Adult
Afp	11.8801	-4.50307	1.202	-3.675	0.00023785	0.00129393	up in Adult
Chst13	12.9208	-4.49426	1.24354	-3.5226	0.000427331	0.00217081	up in Adult
Frmpd4	39056.9	-4.46591	0.3273	-13.6444	2.18019e-42	2.9085e-40	up in Adult
Tff2	25.1552	-4.44744	0.933624	-4.478	7.53471e-06	5.78551e-05	up in Adult
Nlrp4c	351.638	-4.43227	0.450404	-9.80993	1.02037e-22	4.78151e-21	up in Adult
1700034E13Rik	22.1974	-4.41534	0.994226	-4.1304	3.62137e-05	0.000236443	up in Adult
Jaml	24.055	-4.40896	0.985929	-4.17523	2.97679e-05	0.000199278	up in Adult
4930557F10Rik	52.8002	-4.40368	0.771324	-5.56486	2.62357e-08	3.06243e-07	up in Adult
Rbm25	6398.12	-4.40353	0.387977	-11.3462	7.74694e-30	5.38576e-28	up in Adult
Rmnd1	569.043	-4.39581	1.03498	-4.35592	1.3251e-05	9.63287e-05	up in Adult
Sez6l	2918.57	-4.3593	0.34951	-12.4682	1.11295e-35	1.01732e-33	up in Adult
Krt28	751.219	-4.35839	0.661291	-6.57643	4.81875e-11	8.23022e-10	up in Adult
Gm20172	12.659	-4.35602	1.2915	-3.10957	0.00187359	0.00793822	up in Adult
Myo10	7516.35	-4.34639	0.346528	-12.542	4.39571e-36	4.10234e-34	up in Adult
Polr1b	1172.2	-4.33665	0.561576	-7.71331	1.22592e-14	3.09785e-13	up in Adult
Il11ra1	220.054	-4.32775	0.564097	-7.63595	2.24154e-14	5.45933e-13	up in Adult
Akr1c6	14.1868	-4.3205	1.12919	-3.33088	0.000865732	0.00405048	up in Adult
D030056L22Rik	11.3513	-4.30928	1.16599	-3.16967	0.00152611	0.00663688	up in Adult
B230209E15Rik	200.584	-4.30228	0.616554	-6.94287	3.84216e-12	7.51582e-11	up in Adult
B3gnt2	363.573	-4.30052	0.643257	-6.66599	2.6289e-11	4.67895e-10	up in Adult
Ism2	61.8318	-4.29798	0.710433	-5.93868	2.8733e-09	3.8892e-08	up in Adult
Fn3k	208.46	-4.29089	0.710834	-6.01315	1.81951e-09	2.53703e-08	up in Adult
H2afz	72.4861	-4.27398	0.634943	-6.62623	3.44363e-11	6.05621e-10	up in Adult
Fbln7	161.184	-4.27234	0.843943	-5.05594	4.28273e-07	4.08889e-06	up in Adult
Gm4884	15.1269	-4.26403	1.19212	-3.17434	0.00150175	0.00654442	up in Adult
2310016D03Rik	64.1818	-4.25789	0.776868	-5.37921	7.48137e-08	8.11011e-07	up in Adult
Pacsin3	36.9896	-4.25148	0.868176	-4.73339	2.20803e-06	1.8867e-05	up in Adult
Ndufaf4	59.1153	-4.23814	0.747859	-5.56028	2.69347e-08	3.13068e-07	up in Adult
Srsf1	600.57	-4.22568	0.477304	-8.8367	9.85843e-19	3.52618e-17	up in Adult
Enpp3	54.6118	-4.22514	0.696349	-6.00063	1.96556e-09	2.72243e-08	up in Adult
Arhgef1	10.3878	-4.21864	1.29453	-3.03367	0.00241596	0.00990462	up in Adult
Clspn	17.9414	-4.20446	1.12367	-3.62242	0.00029186	0.00155017	up in Adult
Gm17660	1954.87	-4.20217	0.532129	-7.89019	3.01737e-15	8.07978e-14	up in Adult
Sfpq	4334.96	-4.19812	0.435335	-9.63761	5.5466e-22	2.46649e-20	up in Adult
Rbfox1	27576.5	-4.18856	0.307401	-13.6255	2.82281e-42	3.69913e-40	up in Adult
Ifitm7	105.25	-4.16248	0.833473	-4.94692	7.53968e-07	6.96492e-06	up in Adult
Alx1	41.2421	-4.15968	0.736985	-5.50226	3.74957e-08	4.24818e-07	up in Adult
Nek2	92.6749	-4.15507	0.725041	-5.67951	1.35081e-08	1.65723e-07	up in Adult
Dnah6	947.101	-4.15151	0.348376	-11.9062	1.09929e-32	8.7518e-31	up in Adult
Rhbdf2	75.4018	-4.13736	0.975573	-4.15965	3.18733e-05	0.000211461	up in Adult
Armh4	1515.43	-4.11807	0.286934	-14.3438	1.16517e-46	1.87541e-44	up in Adult
Parp9	115.44	-4.09715	0.801299	-5.08339	3.70766e-07	3.58375e-06	up in Adult
Exoc4	464.349	-4.08764	0.614301	-6.63467	3.2524e-11	5.7267e-10	up in Adult
Btla	20.8931	-4.07637	0.95102	-4.06319	4.84066e-05	0.000308968	up in Adult
Gm21119	1273.67	-4.07602	0.635714	-6.40286	1.52495e-10	2.45718e-09	up in Adult
Pnpla3	402.121	-4.07112	0.434419	-9.35363	8.46904e-21	3.55268e-19	up in Adult
Mpzl3	24.0679	-4.06769	0.912469	-4.24847	2.15234e-05	0.000148264	up in Adult
Il1r1	597.386	-4.06186	0.319248	-12.7082	5.32284e-37	5.18557e-35	up in Adult
Gm5065	73.4407	-4.06018	0.602021	-6.66016	2.73535e-11	4.86256e-10	up in Adult
D430041D05Rik	136.182	-4.05737	1.29134	-3.16283	0.00156244	0.00677102	up in Adult
2700070H01Rik	75.1432	-4.055	0.887487	-4.50698	6.57561e-06	5.07672e-05	up in Adult
Rasgrf1	962.77	-4.04828	0.561452	-7.19846	6.08955e-13	1.31067e-11	up in Adult
Ankrd33b	1537.61	-4.03992	0.347047	-11.6326	2.81482e-31	2.09456e-29	up in Adult
Hsp90aa1	205.018	-4.03064	0.57299	-7.00329	2.50017e-12	4.98284e-11	up in Adult
BC048602	348.399	-4.02566	0.5991	-6.70014	2.08225e-11	3.75109e-10	up in Adult
Pnisr	4528.83	-4.02377	0.253142	-15.8931	7.07183e-57	1.93925e-54	up in Adult
Col5a3	16.3967	-4.01913	1.10795	-3.41321	0.000642034	0.00311713	up in Adult
Acnat2	12.9206	-4.019	1.12279	-3.17851	0.00148032	0.00646053	up in Adult
5930412G12Rik	16.7366	-4.01124	1.12275	-3.36431	0.000767364	0.00365491	up in Adult
Zfand4	6016.88	-4.00137	0.291018	-13.7475	5.27104e-43	7.22718e-41	up in Adult
Garnl3	11512.9	-3.99055	0.261484	-15.2599	1.41553e-52	3.17594e-50	up in Adult
Gm5083	132.463	-3.98021	0.585129	-6.75561	1.42238e-11	2.60354e-10	up in Adult
Tanc1	4719.75	-3.97735	0.284431	-13.9825	1.99369e-44	2.95226e-42	up in Adult
Luc7l3	5750.05	-3.96943	0.329638	-12.0392	2.21052e-33	1.84935e-31	up in Adult
Mcam	51.0907	-3.9675	0.823652	-4.72503	2.30082e-06	1.95807e-05	up in Adult
Slc9a3	2297.47	-3.9641	0.940637	-4.25708	2.07113e-05	0.000143516	up in Adult
Mpdz	872.991	-3.95573	0.498985	-7.91824	2.40894e-15	6.49754e-14	up in Adult
Hspa5	173.12	-3.95225	0.442631	-8.89086	6.06352e-19	2.21154e-17	up in Adult
AA465934	50.0602	-3.94984	0.837046	-4.63281	3.60739e-06	2.93829e-05	up in Adult
Adprhl1	17.5303	-3.94779	1.07956	-3.22645	0.00125337	0.00558359	up in Adult
Nup62cl	133.789	-3.93511	1.29415	-3.04969	0.00229079	0.00947015	up in Adult
Ran	19.7698	-3.93329	1.01806	-3.67922	0.000233945	0.00127738	up in Adult
Gria3	9567.42	-3.93159	0.300513	-13.0822	4.16317e-39	4.56654e-37	up in Adult
Cd244a	23.7481	-3.92903	0.976856	-3.84979	0.000118221	0.000692214	up in Adult
AA986860	11.5584	-3.92593	1.12818	-3.09578	0.00196294	0.00827892	up in Adult
A930001C03Rik	15.0016	-3.90504	1.08693	-3.2468	0.00116709	0.00524657	up in Adult
4930429D17Rik	103.537	-3.90117	0.64661	-5.98844	2.11858e-09	2.91831e-08	up in Adult
4732490B19Rik	55.5335	-3.88475	0.880965	-4.3296	1.49381e-05	0.000107328	up in Adult
Sun5	49.1764	-3.87871	0.87034	-4.39482	1.10865e-05	8.18794e-05	up in Adult
2020-09-04	231.593	-3.87383	0.584632	-6.60552	3.96133e-11	6.90109e-10	up in Adult
D730003I15Rik	13.735	-3.87155	1.16008	-3.08151	0.00205954	0.00863222	up in Adult
Lncpint	1987.42	-3.87075	0.365684	-10.5817	3.6214e-26	2.13648e-24	up in Adult
Lgr5	607.77	-3.87039	0.308353	-12.5379	4.63367e-36	4.28846e-34	up in Adult
Lefty2	13.1304	-3.87001	1.13803	-3.14015	0.00168863	0.00724788	up in Adult
Vsig10	94.6329	-3.85946	0.549429	-6.96496	3.28503e-12	6.46872e-11	up in Adult
Auh	1925	-3.85157	0.474542	-8.11122	5.01122e-16	1.42979e-14	up in Adult
Gm15816	10.0844	-3.84453	1.20964	-3.28252	0.00102883	0.00471233	up in Adult
Olfr1033	14.9698	-3.83521	1.11156	-3.2173	0.00129402	0.00573882	up in Adult
Pnn	886.301	-3.83417	0.332371	-11.5272	9.62524e-31	7.02121e-29	up in Adult
Enpp6	71.6797	-3.81936	0.630026	-6.04718	1.47407e-09	2.08283e-08	up in Adult
Qdpr	74.9755	-3.81782	0.562398	-6.72456	1.76128e-11	3.20012e-10	up in Adult
Mphosph10	58.0703	-3.81713	0.686727	-5.4894	4.03298e-08	4.54493e-07	up in Adult
Lrrc18	49.5268	-3.7983	0.965285	-3.90102	9.57897e-05	0.000573808	up in Adult
Trpc3	9029.17	-3.79728	0.321116	-11.8245	2.916e-32	2.29913e-30	up in Adult
S100a13	46.9933	-3.78239	1.17915	-3.10847	0.00188059	0.00796335	up in Adult
Atl2	6404.48	-3.78172	0.353611	-10.6942	1.08376e-26	6.57715e-25	up in Adult
Baiap2	1038.68	-3.78119	0.582083	-6.49879	8.09693e-11	1.34416e-09	up in Adult
Rnf144b	189.18	-3.77996	0.560056	-6.73684	1.61867e-11	2.94826e-10	up in Adult
Magee1	23.3635	-3.76344	0.892263	-4.06947	4.71202e-05	0.000301276	up in Adult
Slc12a8	939.246	-3.7618	0.294323	-12.776	2.23215e-37	2.21837e-35	up in Adult
1810007D17Rik	46.4518	-3.75478	0.90972	-4.07525	4.59654e-05	0.000294912	up in Adult
Paxbp1	7681.47	-3.75002	0.233434	-16.0636	4.59463e-58	1.28372e-55	up in Adult
Gm4846	32.1376	-3.74899	0.848189	-4.3164	1.58596e-05	0.000112963	up in Adult
Sult1b1	84.2411	-3.74298	0.587026	-6.32754	2.49101e-10	3.91997e-09	up in Adult
Tgfb1	24.1209	-3.73795	0.993464	-3.60007	0.000318135	0.00167769	up in Adult
Eif5	370.87	-3.73724	0.528091	-7.06186	1.6429e-12	3.34635e-11	up in Adult
Tnfsf11	26.921	-3.73036	0.917158	-3.9525	7.73402e-05	0.000473637	up in Adult
Iqcb1	147.028	-3.72113	0.638368	-5.79662	6.76637e-09	8.67502e-08	up in Adult
Mtap	367.302	-3.70706	0.693185	-5.32362	1.01722e-07	1.08212e-06	up in Adult
Syndig1	11718.2	-3.70454	0.248723	-14.8938	3.61817e-50	6.86896e-48	up in Adult
Pde5a	6841.68	-3.69447	0.198938	-18.5696	5.66586e-77	3.99524e-74	up in Adult
1700042G15Rik	49.1636	-3.69406	0.797183	-4.569	4.90064e-06	3.88068e-05	up in Adult
Cdc20	15.3438	-3.69164	1.28297	-3.1339	0.00172501	0.00738691	up in Adult
Wnt2	80.3916	-3.68974	0.558032	-6.56121	5.33746e-11	9.03281e-10	up in Adult
Mageh1	39.032	-3.68626	0.950774	-3.76628	0.0001657	0.000935805	up in Adult
Ntsr1	117.435	-3.68209	0.816759	-4.43998	8.99658e-06	6.77282e-05	up in Adult
Platr17	22.9269	-3.67776	0.966613	-3.68985	0.000224387	0.00123018	up in Adult
Apol8	42.5615	-3.67191	0.825538	-4.37762	1.19982e-05	8.79553e-05	up in Adult
Csad	4015.93	-3.66962	0.351389	-10.4413	1.60547e-25	9.10871e-24	up in Adult
Srms	11.484	-3.66793	1.12336	-3.03972	0.00236799	0.00973223	up in Adult
Pdzph1	181.912	-3.66718	0.423548	-8.62887	6.19595e-18	2.06643e-16	up in Adult
Mtss1	22034	-3.66637	0.268086	-13.6761	1.41053e-42	1.89883e-40	up in Adult
1700128A07Rik	16.9871	-3.66293	0.987307	-3.55238	0.000381765	0.00196564	up in Adult
Plxdc1	2332.85	-3.6577	0.638857	-5.73746	9.61057e-09	1.20605e-07	up in Adult
Erdr1	13972.3	-3.65104	0.2594	-14.0739	5.49352e-45	8.30082e-43	up in Adult
Tmem181c-ps	325.016	-3.64466	0.659887	-5.49282	3.9557e-08	4.46804e-07	up in Adult
Sox30	43.3628	-3.64362	0.80805	-4.44459	8.80588e-06	6.65973e-05	up in Adult
Rreb1	3647.47	-3.63908	0.365085	-9.96749	2.1151e-23	1.04055e-21	up in Adult
Zfp58	127.923	-3.63333	0.506147	-7.14243	9.16932e-13	1.93418e-11	up in Adult
Nlrp9c	34.4733	-3.62291	0.845074	-4.2056	2.60395e-05	0.000175829	up in Adult
Kcnmb4	568.921	-3.61939	0.283962	-12.7365	3.70674e-37	3.6593e-35	up in Adult
Nudt7	105.112	-3.6047	0.519546	-6.90144	5.14767e-12	9.95127e-11	up in Adult
Slc16a9	863.32	-3.60194	0.716027	-5.00474	5.59371e-07	5.2625e-06	up in Adult
Cacna1s	29.6537	-3.60049	0.91998	-3.83041	0.000127929	0.00074202	up in Adult
Nppc	16.7656	-3.58664	1.01558	-3.29653	0.000978884	0.00451427	up in Adult
Cd96	20.5251	-3.57478	0.955757	-3.62061	0.000293907	0.00155936	up in Adult
Lrfn5	605.73	-3.56736	0.592852	-6.00994	1.85592e-09	2.58294e-08	up in Adult
4930587E11Rik	156.619	-3.56664	1.29918	-3.67487	0.00023797	0.00129411	up in Adult
Tmprss11c	13.1077	-3.55963	1.04288	-3.2388	0.00120034	0.00537812	up in Adult
Mrfap1	50.1948	-3.55961	0.838596	-4.1897	2.7932e-05	0.000187581	up in Adult
Plekha6	301.408	-3.55471	0.477174	-7.43559	1.04102e-13	2.4049e-12	up in Adult
Pcgf5	111.215	-3.5542	0.561637	-6.29596	3.055e-10	4.75693e-09	up in Adult
Ywhah	931.451	-3.55272	0.343316	-10.3432	4.49156e-25	2.46337e-23	up in Adult
Gabrd	10.8282	-3.55231	1.22484	-3.10613	0.00189556	0.00801757	up in Adult
Rps12	12.3543	-3.54597	1.07222	-3.12756	0.00176262	0.00752839	up in Adult
Snhg20	253.764	-3.54116	0.423477	-8.3458	7.07364e-17	2.16418e-15	up in Adult
4930567K12Rik	28.0191	-3.53466	0.954933	-3.62119	0.000293246	0.00155641	up in Adult
Agxt2	36.5517	-3.52201	1.02874	-3.34654	0.000818257	0.00385884	up in Adult
B4galnt3	310.508	-3.51259	0.435702	-8.04927	8.32914e-16	2.34483e-14	up in Adult
Zfp979	29.1203	-3.51141	0.873512	-3.86226	0.000112344	0.000661993	up in Adult
Uaca	54.6867	-3.51079	0.820918	-4.2671	1.98027e-05	0.000138189	up in Adult
Acad11	159.664	-3.51052	0.544447	-6.42548	1.31451e-10	2.12736e-09	up in Adult
Kcnab1	25289.1	-3.50122	0.239972	-14.5899	3.25592e-48	5.5418e-46	up in Adult
Synpo2	239.302	-3.49834	0.354926	-9.83523	7.93877e-23	3.79217e-21	up in Adult
Rmdn3	633.829	-3.49815	0.507363	-6.89199	5.50169e-12	1.05942e-10	up in Adult
Cntnap5b	21446.7	-3.49643	0.267965	-13.0476	6.5582e-39	7.0886e-37	up in Adult
Glp2r	196.14	-3.49637	0.489974	-7.11751	1.09892e-12	2.29194e-11	up in Adult
Cyp2c38	23.4052	-3.4862	0.937732	-3.62909	0.00028442	0.00151663	up in Adult
AI450353	43.3718	-3.47451	0.977336	-3.54324	0.000395243	0.00202588	up in Adult
Pon2	60.2647	-3.46989	0.751868	-4.58077	4.63263e-06	3.69612e-05	up in Adult
Atp5g3	59.3877	-3.46864	0.644429	-5.33647	9.47715e-08	1.01108e-06	up in Adult
4930556N09Rik	14.3562	-3.45963	1.03821	-3.19408	0.00140278	0.00615479	up in Adult
Scel	150.727	-3.45853	0.523895	-6.57699	4.80063e-11	8.21778e-10	up in Adult
4930459C07Rik	435.073	-3.44739	0.566245	-6.07847	1.21336e-09	1.73599e-08	up in Adult
Gm12992	291.768	-3.44669	0.551887	-6.2464	4.20008e-10	6.41184e-09	up in Adult
Tpte	267.484	-3.44563	0.483205	-7.11759	1.09832e-12	2.29194e-11	up in Adult
Bcl2l15	62.1835	-3.44549	0.627908	-5.44076	5.30533e-08	5.85405e-07	up in Adult
Rab26os	66.955	-3.44356	0.796662	-4.26394	2.00854e-05	0.000139767	up in Adult
Rhod	72.8234	-3.44258	0.613435	-5.57101	2.53261e-08	2.97406e-07	up in Adult
Hhatl	52.1208	-3.43939	0.750096	-4.53161	5.85357e-06	4.55356e-05	up in Adult
Dab2	17.2478	-3.4385	0.995454	-3.36632	0.000761795	0.00363189	up in Adult
Tinf2	30.7751	-3.4326	0.972956	-3.45071	0.000559105	0.00275882	up in Adult
Hpcal1	4401.35	-3.42663	0.229774	-14.9117	2.76437e-50	5.3162e-48	up in Adult
Stxbp2	1314.21	-3.42628	0.311102	-11.0099	3.42203e-28	2.21282e-26	up in Adult
1700080N15Rik	905.911	-3.42494	0.350908	-9.75587	1.74101e-22	8.03141e-21	up in Adult
Adad2	24.3543	-3.41766	1.1742	-3.20304	0.00135986	0.00599844	up in Adult
AW822252	142.861	-3.41613	0.437417	-7.7839	7.03199e-15	1.81411e-13	up in Adult
1190028D05Rik	63.7063	-3.41581	0.722616	-4.68615	2.7839e-06	2.32641e-05	up in Adult
Cyb5r1	47.5477	-3.41457	0.861105	-3.92771	8.57587e-05	0.000521098	up in Adult
Plekhg1	1010.64	-3.41126	0.546063	-6.24064	4.35772e-10	6.61838e-09	up in Adult
Mreg	284.196	-3.40421	0.380631	-8.92525	4.44686e-19	1.6545e-17	up in Adult
2310034O05Rik	26.1546	-3.40311	0.994422	-3.36606	0.000762515	0.00363415	up in Adult
Ccdc178	276.408	-3.40195	0.388416	-8.74485	2.23307e-18	7.7989e-17	up in Adult
1110020A21Rik	52.2576	-3.39212	0.997027	-3.38849	0.000702786	0.00337556	up in Adult
Zfp160	162.375	-3.38849	0.787575	-4.31236	1.61524e-05	0.000114662	up in Adult
Topbp1	20.2025	-3.38834	1.28431	-3.15698	0.00159412	0.00688616	up in Adult
Clmn	6957.23	-3.38697	0.311944	-10.8578	1.83152e-27	1.13478e-25	up in Adult
Lipk	19.7739	-3.38425	0.906989	-3.63408	0.000278978	0.00149084	up in Adult
Tec	158.145	-3.38344	0.612788	-5.50306	3.73257e-08	4.23215e-07	up in Adult
Gm3604	1311.63	-3.38095	0.363042	-9.30957	1.28347e-20	5.30884e-19	up in Adult
Nefm	355.304	-3.38011	0.330184	-10.2235	1.55595e-24	8.22877e-23	up in Adult
Ndufa4	84.5997	-3.37842	0.720193	-4.6662	3.06818e-06	2.5453e-05	up in Adult
Vbp1	429.16	-3.37256	0.510632	-6.59804	4.1663e-11	7.21573e-10	up in Adult
Pik3r5	28.5491	-3.3709	0.977396	-3.38007	0.000724686	0.00347737	up in Adult
Npr1	138.459	-3.36958	0.553993	-6.06174	1.34659e-09	1.91733e-08	up in Adult
4930431P03Rik	15.5322	-3.36464	1.21063	-3.07613	0.00209704	0.00877201	up in Adult
Prkg1	97333.9	-3.35924	0.377698	-8.89396	5.89675e-19	2.16136e-17	up in Adult
Fem1c	807.805	-3.35838	0.390679	-8.5921	8.53928e-18	2.80999e-16	up in Adult
Setd1b	933.263	-3.35314	0.474537	-7.06118	1.65097e-12	3.35819e-11	up in Adult
Gabra4	133.359	-3.35264	0.463146	-7.21396	5.43461e-13	1.17483e-11	up in Adult
Pzp	28.9365	-3.35187	0.891158	-3.70119	0.000214589	0.00118172	up in Adult
Plcb3	611.502	-3.34818	0.58337	-5.74073	9.42691e-09	1.18601e-07	up in Adult
Twist2	92.1731	-3.34804	0.588937	-5.6573	1.53771e-08	1.87103e-07	up in Adult
Mbd4	102.07	-3.34585	0.621204	-5.36432	8.1253e-08	8.75687e-07	up in Adult
Epsti1	72.1606	-3.34542	0.721099	-4.61342	3.96106e-06	3.19474e-05	up in Adult
Cldn34d	54.4336	-3.34317	0.857147	-3.8492	0.000118504	0.000693122	up in Adult
Vmn2r60	24.0652	-3.3424	0.878426	-3.72721	0.000193612	0.00107742	up in Adult
Vax2	391.374	-3.33975	0.413255	-8.07298	6.86055e-16	1.94247e-14	up in Adult
Palld	790.778	-3.33404	0.361009	-9.23258	2.64182e-20	1.07473e-18	up in Adult
Fam98c	20.4026	-3.33097	1.02129	-3.11093	0.00186499	0.00790858	up in Adult
Cyp27a1	268.718	-3.32621	0.458195	-7.24848	4.21483e-13	9.18665e-12	up in Adult
Mylip	2044.92	-3.31916	0.569439	-5.82384	5.75099e-09	7.46369e-08	up in Adult
Cntn3	4821.63	-3.30895	0.328743	-10.0642	7.95527e-24	4.0343e-22	up in Adult
Zfp97	60.3822	-3.30234	0.779044	-4.21185	2.53285e-05	0.000171419	up in Adult
Kcnab2	2134.83	-3.30108	0.281086	-11.7421	7.74962e-32	5.97689e-30	up in Adult
Fhl5	338.6	-3.3001	0.43396	-7.59609	3.05206e-14	7.32494e-13	up in Adult
Trabd2b	5508.95	-3.29913	0.317063	-10.4054	2.34326e-25	1.31175e-23	up in Adult
Ablim2	3721.94	-3.29855	0.319871	-10.3116	6.24754e-25	3.41379e-23	up in Adult
Sorl1	9992.53	-3.2973	0.197076	-16.7305	7.85489e-63	2.90788e-60	up in Adult
Cers3	87.3924	-3.29371	0.734064	-4.46261	8.09666e-06	6.19294e-05	up in Adult
Pdzrn4	857.254	-3.28701	0.247914	-13.2526	4.35569e-40	5.11897e-38	up in Adult
Il16	151.141	-3.28489	0.938772	-3.45614	0.000547973	0.00271384	up in Adult
D3Ertd751e	178.795	-3.28465	0.64123	-5.11363	3.1603e-07	3.08896e-06	up in Adult
Homer3	989.075	-3.28428	0.461912	-7.1102	1.15877e-12	2.40997e-11	up in Adult
Sacs	3275.33	-3.28254	0.362415	-9.05696	1.34133e-19	5.19958e-18	up in Adult
Hemgn	21.1243	-3.28248	0.890516	-3.60517	0.000311948	0.00164741	up in Adult
Slc18b1	40108.9	-3.28205	0.509415	-6.44027	1.19261e-10	1.93642e-09	up in Adult
Naaa	546.608	-3.28023	0.551934	-5.94349	2.7902e-09	3.79057e-08	up in Adult
9330175M20Rik	487.647	-3.27874	0.529442	-6.18342	6.2726e-10	9.36337e-09	up in Adult
Aga	16.3766	-3.27433	1.04524	-3.04527	0.0023247	0.00958357	up in Adult
Tmbim6	1230.85	-3.27052	0.596618	-5.47394	4.40148e-08	4.93393e-07	up in Adult
Set	69.9966	-3.26998	0.570003	-5.6975	1.21575e-08	1.50274e-07	up in Adult
Srsf5	1577.17	-3.26139	0.43524	-7.49177	6.79518e-14	1.59466e-12	up in Adult
Rfwd3	197.247	-3.25918	0.55905	-5.82087	5.85432e-09	7.59114e-08	up in Adult
Hist1h2be	122.351	-3.25247	0.774367	-4.19941	2.6761e-05	0.00018029	up in Adult
Opn5	72.6961	-3.25054	0.806476	-4.02191	5.77289e-05	0.000362685	up in Adult
Rasal3	37.4782	-3.24508	0.843609	-3.80212	0.000143464	0.000822458	up in Adult
Cox14	27.5667	-3.2425	0.872131	-3.66324	0.000249047	0.00134841	up in Adult
Hsd17b2	278.1	-3.24185	0.53813	-6.01502	1.79865e-09	2.51743e-08	up in Adult
Fbxo4	156.697	-3.23599	0.621292	-5.19928	2.0006e-07	2.02494e-06	up in Adult
Gpr149	34.6575	-3.23374	0.818457	-3.9094	9.25265e-05	0.000556738	up in Adult
Ptchd4	8526.92	-3.23331	0.278489	-11.61	3.66624e-31	2.70098e-29	up in Adult
Fstl4	5687.98	-3.20971	0.217529	-14.7545	2.87824e-49	5.19767e-47	up in Adult
Grin2c	37.1592	-3.20749	0.898535	-3.52465	0.000424048	0.00215815	up in Adult
1700022A22Rik	19.5708	-3.20247	0.994222	-3.17011	0.00152383	0.00663089	up in Adult
Slc6a5	75.8641	-3.20232	0.644347	-4.94441	7.63767e-07	7.04664e-06	up in Adult
Bco1	45.7936	-3.19981	0.769556	-4.1224	3.74947e-05	0.000244053	up in Adult
Ly96	85.5894	-3.19965	0.529018	-6.0199	1.74521e-09	2.44495e-08	up in Adult
Ttc14	579.837	-3.19327	0.500999	-6.37008	1.88934e-10	3.00831e-09	up in Adult
Hapln1	105.345	-3.19091	0.590624	-5.38267	7.33875e-08	7.96717e-07	up in Adult
Zdhhc17	149.714	-3.18884	1.26245	-3.09409	0.0019742	0.00831833	up in Adult
Ptk2b	202.128	-3.18838	0.5947	-5.34455	9.06442e-08	9.67743e-07	up in Adult
Cap2	962.797	-3.1805	0.404265	-7.86554	3.67506e-15	9.77024e-14	up in Adult
Saxo1	29.683	-3.17896	0.801065	-3.91194	9.15571e-05	0.000551353	up in Adult
Sipa1l1	324.133	-3.17743	0.770069	-4.12148	3.76445e-05	0.000244814	up in Adult
Rel	79.5269	-3.17604	0.718925	-4.39353	1.11527e-05	8.23275e-05	up in Adult
Nr3c2	1290.69	-3.16954	0.465308	-6.8096	9.78679e-12	1.82522e-10	up in Adult
Wwtr1	224.683	-3.16808	0.349282	-9.05569	1.35708e-19	5.23323e-18	up in Adult
Rassf4	59.0328	-3.16043	0.706211	-4.45315	8.46198e-06	6.42261e-05	up in Adult
Tceal5	27.8769	-3.15979	0.928786	-3.33333	0.000858124	0.00402251	up in Adult
Ebna1bp2	53.2168	-3.14968	0.669999	-4.66301	3.11614e-06	2.57643e-05	up in Adult
Sec11c	120.639	-3.14939	0.667241	-4.70619	2.52387e-06	2.12712e-05	up in Adult
Opn3	265.014	-3.14787	0.430904	-7.29388	3.01147e-13	6.63599e-12	up in Adult
Zbtb16	170.731	-3.1404	0.751937	-4.15743	3.21848e-05	0.000213145	up in Adult
Mir124a-1hg	7485.31	-3.14013	0.231703	-13.5518	7.72847e-42	9.69858e-40	up in Adult
Gas7	2608.74	-3.14004	0.334806	-9.37843	6.6964e-21	2.81705e-19	up in Adult
Ccdc122	220.466	-3.13623	0.558208	-5.605	2.08249e-08	2.48805e-07	up in Adult
Il1rap	1569.72	-3.12901	0.351655	-8.89674	5.75135e-19	2.11856e-17	up in Adult
Frmpd3	1203.21	-3.12863	0.609046	-5.12585	2.96202e-07	2.91246e-06	up in Adult
St3gal6	347.576	-3.12522	0.546297	-5.71653	1.08723e-08	1.35178e-07	up in Adult
Il20ra	21.3127	-3.12216	0.893304	-3.43384	0.000595086	0.00291692	up in Adult
Smpx	1142.9	-3.11918	0.291681	-10.6905	1.12726e-26	6.81327e-25	up in Adult
Tbc1d8b	72.0786	-3.1151	0.589017	-5.26258	1.42044e-07	1.47488e-06	up in Adult
Rnf19b	804.591	-3.1121	0.367825	-8.45774	2.72612e-17	8.62571e-16	up in Adult
Dynlt3	34.3806	-3.10198	0.858356	-3.56817	0.000359486	0.00186324	up in Adult
Etfa	740.454	-3.1011	0.360281	-8.60358	7.7265e-18	2.55388e-16	up in Adult
Clic6	1029.15	-3.09949	0.396233	-7.81768	5.38049e-15	1.40519e-13	up in Adult
Gm14169	123.189	-3.09883	0.493936	-6.253	4.02648e-10	6.15955e-09	up in Adult
Abhd3	1275.92	-3.09828	0.24026	-12.8924	4.96752e-38	5.10826e-36	up in Adult
Wt1	34.8147	-3.09502	0.75181	-4.07495	4.60243e-05	0.000295161	up in Adult
Hnrnpu	838.496	-3.09463	0.342197	-9.03971	1.57087e-19	6.04195e-18	up in Adult
Ppef2	152.008	-3.09418	0.583805	-5.29196	1.21014e-07	1.26911e-06	up in Adult
Spag7	104.319	-3.08332	0.519688	-5.90941	3.43344e-09	4.59696e-08	up in Adult
Dusp10	606.951	-3.07936	0.45127	-6.82123	9.02662e-12	1.6877e-10	up in Adult
Hnrnpdl	173.452	-3.05434	0.506552	-6.01446	1.80491e-09	2.52381e-08	up in Adult
Mettl5	969.736	-3.05282	0.467779	-6.52289	6.89632e-11	1.15915e-09	up in Adult
Gm20300	34.2235	-3.0437	0.72713	-4.14126	3.45397e-05	0.000226914	up in Adult
Lsmem1	213.735	-3.03568	0.724177	-4.17457	2.98544e-05	0.000199767	up in Adult
Uqcr10	25.005	-3.03434	0.822481	-3.63944	0.000273228	0.00146662	up in Adult
Iars2	411.389	-3.03376	0.507403	-5.97676	2.27619e-09	3.1238e-08	up in Adult
Cndp1	36.127	-3.02994	0.808342	-3.70887	0.000208182	0.00115028	up in Adult
Pan2	487.312	-3.02231	0.426075	-7.08923	1.34858e-12	2.7813e-11	up in Adult
Ociad2	334.497	-3.01391	0.40063	-7.51638	5.63131e-14	1.32996e-12	up in Adult
Nelfcd	115.439	-3.01057	0.633944	-4.72921	2.25397e-06	1.92263e-05	up in Adult
Pmpcb	228.107	-3.01031	0.384574	-7.81701	5.40916e-15	1.41019e-13	up in Adult
Asph	6246.61	-3.00727	0.23977	-12.5419	4.40486e-36	4.10234e-34	up in Adult
Dhrs7	22.2953	-3.00691	0.945142	-3.14452	0.00166362	0.00714677	up in Adult
Cthrc1	118.1	-3.00679	0.743772	-4.03134	5.54593e-05	0.000349762	up in Adult
Gm826	36.2456	-3.00165	0.796574	-3.72947	0.000191886	0.00106861	up in Adult
Znhit1	562.158	-2.99737	0.62748	-4.77226	1.82174e-06	1.57204e-05	up in Adult
Cdrt4	259.814	-2.9941	0.601319	-4.97291	6.59563e-07	6.14265e-06	up in Adult
Magoh	94.6548	-2.98636	0.636721	-4.66708	3.05516e-06	2.53592e-05	up in Adult
Retn	57.8784	-2.98613	0.757906	-3.92358	8.72415e-05	0.000527809	up in Adult
Ninl	745.153	-2.98181	0.362799	-8.21613	2.10182e-16	6.22475e-15	up in Adult
Clvs1	8186.38	-2.97631	0.391854	-7.59523	3.07255e-14	7.36219e-13	up in Adult
Tspan11	3839.63	-2.97238	0.264158	-11.2518	2.26844e-29	1.56238e-27	up in Adult
Odr4	228.004	-2.96665	0.565026	-5.24422	1.56945e-07	1.61729e-06	up in Adult
Ncoa7	6805.93	-2.96358	0.281524	-10.5265	6.52349e-26	3.81817e-24	up in Adult
Bbs7	212.946	-2.95946	0.383532	-7.70679	1.29022e-14	3.24372e-13	up in Adult
Birc2	530.048	-2.95709	0.323085	-9.1479	5.80505e-20	2.30459e-18	up in Adult
Pcsk6	5260.03	-2.95697	0.223183	-13.2485	4.6022e-40	5.36609e-38	up in Adult
Card6	27.2563	-2.95638	0.882044	-3.3167	0.000910876	0.00423493	up in Adult
Dancr	31.4065	-2.95192	0.960023	-3.04591	0.00231979	0.00957399	up in Adult
Cdca2	34.4113	-2.94985	0.851235	-3.40105	0.000671284	0.00324108	up in Adult
Zfp367	27.2832	-2.94453	0.922272	-3.15066	0.00162902	0.00701642	up in Adult
Gtf2e1	92.2399	-2.94267	0.502778	-5.83374	5.41993e-09	7.07746e-08	up in Adult
St8sia5	4100.21	-2.94206	0.28861	-10.1936	2.11668e-24	1.09978e-22	up in Adult
Pcmtd2	592.673	-2.93996	0.357118	-8.22835	1.89808e-16	5.63261e-15	up in Adult
Cox6b1	2180.7	-2.93603	0.443367	-6.62185	3.54722e-11	6.22361e-10	up in Adult
Fbxl21	392.04	-2.93575	0.443831	-6.60814	3.89179e-11	6.78795e-10	up in Adult
Slc25a46	1283.5	-2.93325	0.226278	-12.9603	2.05492e-38	2.1581e-36	up in Adult
Pls3	255.735	-2.9308	0.556203	-5.25962	1.44351e-07	1.49584e-06	up in Adult
Mettl11b	56.2685	-2.91436	0.866465	-3.36281	0.000771541	0.00367363	up in Adult
Sox5	19849.8	-2.91115	0.296493	-9.81903	9.32351e-23	4.39689e-21	up in Adult
Eif3a	447.346	-2.906	0.357657	-8.12015	4.65594e-16	1.33099e-14	up in Adult
Gm6602	79.8953	-2.90335	0.56131	-5.15362	2.55504e-07	2.54097e-06	up in Adult
Selenos	431.747	-2.89963	0.452952	-6.3959	1.59601e-10	2.56331e-09	up in Adult
Zdhhc14	16392.1	-2.89759	0.320662	-9.03601	1.62494e-19	6.21762e-18	up in Adult
Wipf1	114.579	-2.89537	0.545304	-5.29364	1.19906e-07	1.25838e-06	up in Adult
Klf13	2391.52	-2.89055	0.542234	-5.3288	9.88649e-08	1.05323e-06	up in Adult
Lrrk2	1182.45	-2.87464	0.325213	-8.83689	9.84237e-19	3.52618e-17	up in Adult
Abcd2	183.746	-2.87288	0.593455	-4.83658	1.3209e-06	1.16915e-05	up in Adult
4930435E12Rik	43.3667	-2.87153	0.854712	-3.3274	0.000876614	0.00409234	up in Adult
Cldn12	124.914	-2.86981	0.718969	-3.97461	7.04932e-05	0.000435669	up in Adult
Rasl11b	65.4422	-2.86885	0.604027	-4.72812	2.26613e-06	1.93078e-05	up in Adult
Pik3c2g	64.438	-2.86312	0.606324	-4.70557	2.53158e-06	2.1324e-05	up in Adult
Clec2l	1977.55	-2.85696	0.487981	-5.85692	4.71531e-09	6.2232e-08	up in Adult
Sybu	6137.99	-2.85296	0.217857	-13.0952	3.50783e-39	3.90556e-37	up in Adult
Dgkz	4113.03	-2.8521	0.370193	-7.70458	1.31276e-14	3.29481e-13	up in Adult
Gm14827	152.39	-2.84407	0.397159	-7.14823	8.79024e-13	1.86484e-11	up in Adult
Skint5	216.992	-2.84402	0.62079	-4.57327	4.8017e-06	3.81048e-05	up in Adult
Tmx1	143.277	-2.84304	0.492712	-5.75723	8.55045e-09	1.08033e-07	up in Adult
4930432J09Rik	21.9126	-2.84206	0.834259	-3.35312	0.000799066	0.003784	up in Adult
F2r	173.297	-2.83917	0.550342	-5.14873	2.62258e-07	2.60289e-06	up in Adult
Srp9	29.1638	-2.83881	0.759033	-3.70345	0.000212686	0.00117167	up in Adult
Ppp1r16b	9920.37	-2.83759	0.301672	-9.40672	5.11849e-21	2.17177e-19	up in Adult
Ndrg4	2348.27	-2.83278	0.389416	-7.27423	3.48394e-13	7.6657e-12	up in Adult
Slc22a19	49.2037	-2.83105	0.687133	-4.09762	4.17425e-05	0.000269569	up in Adult
Twf2	65.6266	-2.82916	0.830061	-3.37163	0.000747247	0.00357419	up in Adult
Zfp322a	237.798	-2.82814	0.621758	-4.53612	5.72984e-06	4.47036e-05	up in Adult
Grid2	500881	-2.82588	0.216126	-13.0752	4.56121e-39	4.96636e-37	up in Adult
Eva1c	151.549	-2.81888	0.640375	-4.39935	1.08573e-05	8.03475e-05	up in Adult
Gm15446	450.524	-2.81521	0.410345	-6.85662	7.05089e-12	1.33687e-10	up in Adult
Arhgap31	2803.74	-2.811	0.284572	-9.87749	5.21224e-23	2.52232e-21	up in Adult
Dnajc7	1079.27	-2.80773	0.449573	-6.24482	4.24287e-10	6.46383e-09	up in Adult
Metap1	329.699	-2.80472	0.412942	-6.78656	1.14835e-11	2.1256e-10	up in Adult
Zfp874b	29.6211	-2.79905	0.841535	-3.28256	0.00102867	0.00471233	up in Adult
Dbndd2	166.664	-2.79794	0.589972	-4.73704	2.16858e-06	1.85513e-05	up in Adult
Ofcc1	91.0849	-2.79531	0.529307	-5.27009	1.36358e-07	1.41797e-06	up in Adult
Ttll5	23939.3	-2.78652	0.22171	-12.5683	3.1536e-36	3.01281e-34	up in Adult
Atf4	95.9587	-2.77722	0.879559	-3.16629	0.00154395	0.00669764	up in Adult
6720489N17Rik	72.4572	-2.77663	0.602407	-4.59285	4.37233e-06	3.51114e-05	up in Adult
Ar	390.373	-2.77603	0.312962	-8.8647	7.67136e-19	2.76393e-17	up in Adult
Ncl	244.923	-2.77413	0.500205	-5.53869	3.04735e-08	3.50079e-07	up in Adult
Grm1	42912.8	-2.77243	0.242646	-11.4259	3.10368e-30	2.19901e-28	up in Adult
Cpeb4	3361.03	-2.77103	0.203654	-13.6056	3.70784e-42	4.77441e-40	up in Adult
Gm10125	1010.01	-2.76092	0.32756	-8.42649	3.56182e-17	1.11745e-15	up in Adult
Syt12	204.884	-2.75605	0.592027	-4.65345	3.26435e-06	2.68696e-05	up in Adult
Rab43	710.434	-2.75214	0.503481	-5.46486	4.63266e-08	5.17315e-07	up in Adult
Scg2	130.263	-2.75061	0.630827	-4.34351	1.40221e-05	0.000101287	up in Adult
Vmn2r-ps54	39.5901	-2.74707	0.834764	-3.26835	0.00108176	0.00491976	up in Adult
Ttbk1	1595.82	-2.74689	0.302291	-9.08576	1.02978e-19	4.04481e-18	up in Adult
Rgs13	29.1779	-2.74508	0.806572	-3.37162	0.000747278	0.00357419	up in Adult
Hbegf	142.847	-2.7433	0.566027	-4.83754	1.31457e-06	1.16494e-05	up in Adult
Myo6	1142.22	-2.7404	0.596614	-4.59502	4.32702e-06	3.47853e-05	up in Adult
Cwf19l2	779.025	-2.74013	0.299924	-9.13398	6.60282e-20	2.61429e-18	up in Adult
Slc25a37	487.389	-2.73828	0.383237	-7.14279	9.1457e-13	1.93388e-11	up in Adult
Zfp365	36.3617	-2.73404	0.733579	-3.71264	0.00020511	0.0011363	up in Adult
Ddx5	815.077	-2.7301	0.413304	-6.60218	4.05154e-11	7.04169e-10	up in Adult
Gm765	125.934	-2.72936	0.442933	-6.15061	7.71831e-10	1.13611e-08	up in Adult
Crispld2	60.4639	-2.72697	0.683673	-3.97654	6.99253e-05	0.000432521	up in Adult
Galnt13	6679.96	-2.72668	0.193093	-14.1206	2.83763e-45	4.33192e-43	up in Adult
Zfp78	52.9498	-2.72598	0.834506	-3.24661	0.00116788	0.00524855	up in Adult
Prodh2	68.7312	-2.72555	0.81967	-3.33398	0.00085614	0.00401448	up in Adult
Coq3	122.432	-2.72521	0.462309	-5.88327	4.02248e-09	5.34215e-08	up in Adult
Ppp4r4	3306.91	-2.72405	0.287702	-9.46765	2.8621e-21	1.23203e-19	up in Adult
Ccar1	2183.89	-2.72133	0.266716	-10.202	1.94248e-24	1.0164e-22	up in Adult
Cep19	45.8595	-2.72021	0.885178	-3.07657	0.00209399	0.00876422	up in Adult
Seh1l	99.8318	-2.71489	0.582474	-4.64994	3.3203e-06	2.72999e-05	up in Adult
Ano3	859.872	-2.71365	0.275235	-9.85691	6.39862e-23	3.07632e-21	up in Adult
1700028M03Rik	19.063	-2.70734	0.877177	-3.05045	0.00228496	0.00944866	up in Adult
Nell1	32342.7	-2.70536	0.264858	-10.2144	1.70921e-24	9.0071e-23	up in Adult
Sag	66.0495	-2.69674	0.709662	-3.79376	0.000148383	0.000847281	up in Adult
Pcsk1	124.669	-2.69624	0.470504	-5.7207	1.06087e-08	1.32457e-07	up in Adult
Rpgrip1	1733.72	-2.69417	0.527494	-5.10886	3.24113e-07	3.16015e-06	up in Adult
Cntnap5c	9437.67	-2.6936	0.296918	-9.07166	1.17214e-19	4.56763e-18	up in Adult
Higd1a	141.852	-2.69019	0.585152	-4.59041	4.4238e-06	3.54862e-05	up in Adult
Ccdc107	88.0293	-2.68909	0.624187	-4.2938	1.75642e-05	0.000123853	up in Adult
Paqr8	367.305	-2.68621	0.595959	-4.50737	6.56351e-06	5.07003e-05	up in Adult
Tug1	362.939	-2.68177	0.456011	-5.87648	4.19079e-09	5.55571e-08	up in Adult
Crebzf	274.188	-2.67833	0.512358	-5.22264	1.76387e-07	1.79638e-06	up in Adult
6030498E09Rik	39.8402	-2.67493	0.664844	-3.99769	6.3963e-05	0.000397995	up in Adult
Gnai1	1110.99	-2.67425	0.312353	-8.56017	1.12697e-17	3.66773e-16	up in Adult
Ccdc83	51.3769	-2.67284	0.762913	-3.47651	0.000507979	0.00253187	up in Adult
Col4a6	240.805	-2.66761	0.37088	-7.18582	6.68074e-13	1.43374e-11	up in Adult
Ptprr	11604.6	-2.66695	0.233248	-11.4338	2.83281e-30	2.01674e-28	up in Adult
Stab2	213.542	-2.66165	0.380155	-6.99755	2.60474e-12	5.18426e-11	up in Adult
A330023F24Rik	1102.02	-2.66108	0.409669	-6.49616	8.23942e-11	1.36629e-09	up in Adult
Zmat5	127.538	-2.65981	0.639486	-4.1567	3.22877e-05	0.000213635	up in Adult
Tef	289.537	-2.65523	0.53361	-4.97364	6.57076e-07	6.12334e-06	up in Adult
Repin1	321.34	-2.65303	0.806332	-3.26754	0.00108487	0.00493237	up in Adult
Fam160b2	276.053	-2.65294	0.362968	-7.30285	2.81737e-13	6.24245e-12	up in Adult
2020-09-11	5301.75	-2.648	0.221627	-11.9476	6.68432e-33	5.37943e-31	up in Adult
Slc1a6	14327.5	-2.64776	0.293425	-9.02389	1.81518e-19	6.92764e-18	up in Adult
Med8	76.0071	-2.64509	0.814827	-3.24691	0.00116666	0.00524625	up in Adult
Asb12	31.4528	-2.6446	0.852731	-3.09687	0.00195576	0.00825332	up in Adult
Adamts9	774.603	-2.64419	0.48526	-5.44876	5.07213e-08	5.61823e-07	up in Adult
Tiam2	2945.62	-2.64413	0.399166	-6.62343	3.50965e-11	6.16499e-10	up in Adult
Gm13629	467.307	-2.64105	0.421049	-6.2694	3.62441e-10	5.58483e-09	up in Adult
Calm2	2078.65	-2.63885	0.355328	-7.42522	1.12593e-13	2.58093e-12	up in Adult
Hs3st1	468.796	-2.63541	0.671999	-3.92177	8.79004e-05	0.000531494	up in Adult
Socs6	741.388	-2.62472	0.524081	-5.00699	5.52888e-07	5.20481e-06	up in Adult
Mdfi	403.84	-2.61872	0.440724	-5.94084	2.83559e-09	3.84871e-08	up in Adult
Ifi202b	34.5656	-2.61657	0.733349	-3.5429	0.00039575	0.00202707	up in Adult
Cep126	1964.49	-2.61626	0.368778	-7.09355	1.30715e-12	2.70717e-11	up in Adult
Xirp2	136.962	-2.61272	0.473927	-5.50718	3.64631e-08	4.13751e-07	up in Adult
Glt28d2	407.21	-2.61205	0.425606	-6.13464	8.53542e-10	1.25017e-08	up in Adult
Pcx	475.357	-2.61106	0.285213	-9.15021	5.68239e-20	2.26196e-18	up in Adult
Emc7	131.355	-2.60982	0.484267	-5.37864	7.50511e-08	8.1299e-07	up in Adult
Umad1	249.624	-2.60763	0.394876	-6.59858	4.15114e-11	7.1979e-10	up in Adult
4930453N24Rik	37.4408	-2.60724	0.810665	-3.1977	0.00138527	0.00609186	up in Adult
Rabggtb	58.3312	-2.60404	0.585198	-4.43388	9.25503e-06	6.94268e-05	up in Adult
Tial1	904.813	-2.60345	0.359081	-7.24836	4.21861e-13	9.18665e-12	up in Adult
LOC108168459	43.6238	-2.5993	0.696792	-3.72698	0.00019379	0.001078	up in Adult
Ttc4	378.303	-2.59808	0.293923	-8.83506	1.00048e-18	3.56021e-17	up in Adult
Ccdc50	3435.44	-2.59073	0.214724	-12.0649	1.6184e-33	1.36166e-31	up in Adult
Serpina10	45.736	-2.58706	0.809968	-3.18424	0.00145134	0.00635089	up in Adult
Zfp946	224.29	-2.58443	0.53388	-4.83349	1.34163e-06	1.18608e-05	up in Adult
Armcx3	50.8463	-2.58196	0.786041	-3.26545	0.00109292	0.00496594	up in Adult
4931429P17Rik	43.5885	-2.58101	0.7143	-3.5992	0.000319201	0.00168211	up in Adult
4930515L19Rik	36.8766	-2.57986	0.714205	-3.59369	0.000326026	0.00171017	up in Adult
Abca7	174.304	-2.57944	0.427297	-6.03363	1.60313e-09	2.25443e-08	up in Adult
Vps13a	1786.08	-2.5779	0.503979	-5.11388	3.15612e-07	3.08715e-06	up in Adult
Ccdc172	128.672	-2.57599	0.54791	-4.69422	2.67627e-06	2.24153e-05	up in Adult
Met	68.9311	-2.57527	0.641441	-3.99768	6.39673e-05	0.000397995	up in Adult
Asb18	46.9664	-2.57223	0.70156	-3.65339	0.000258803	0.00139358	up in Adult
Ajap1	1086.34	-2.568	0.504511	-5.09028	3.57542e-07	3.46952e-06	up in Adult
Gabrb1	1613.28	-2.56756	0.414778	-6.18844	6.0763e-10	9.0795e-09	up in Adult
Rsrp1	715.023	-2.56712	0.424758	-6.04072	1.53425e-09	2.16373e-08	up in Adult
1700124L16Rik	117.994	-2.56688	0.730061	-3.50413	0.000458096	0.00231783	up in Adult
Slc25a21	286.628	-2.56422	0.442151	-5.79542	6.81507e-09	8.72235e-08	up in Adult
Snhg1	56.5491	-2.56267	0.681297	-3.74241	0.000182261	0.00102116	up in Adult
Nudt14	120.794	-2.56113	0.579782	-4.40603	1.05282e-05	7.81461e-05	up in Adult
Tspoap1	2989.2	-2.55215	0.438022	-5.82604	5.67578e-09	7.37901e-08	up in Adult
Cdh6	35.7223	-2.55158	0.755322	-3.36151	0.000775176	0.00368738	up in Adult
Frem3	41.4096	-2.55002	0.829738	-3.06152	0.00220219	0.00915754	up in Adult
Mtx3	350.319	-2.5471	0.391988	-6.49386	8.36625e-11	1.38577e-09	up in Adult
Exph5	337.248	-2.54667	0.466279	-5.45947	4.77554e-08	5.32128e-07	up in Adult
Pigm	79.8714	-2.54425	0.639067	-3.97069	7.16658e-05	0.000442178	up in Adult
Otud7b	1376.81	-2.54188	0.330178	-7.6978	1.38426e-14	3.46837e-13	up in Adult
Tshb	73.448	-2.5418	0.814213	-3.12152	0.00179921	0.00766034	up in Adult
Pabpn1	1128.97	-2.53856	0.414617	-6.12058	9.32342e-10	1.35887e-08	up in Adult
Luc7l2	5735.47	-2.53662	0.261159	-9.71252	2.66663e-22	1.20757e-20	up in Adult
Rgs7bp	3627.83	-2.52458	0.240647	-10.4904	9.56185e-26	5.50941e-24	up in Adult
Pde7b	1056.66	-2.52456	0.351494	-7.18143	6.89869e-13	1.47838e-11	up in Adult
Prpf38b	650.832	-2.51688	0.595233	-4.22582	2.38073e-05	0.00016261	up in Adult
Tox4	350.923	-2.51164	0.340025	-7.38319	1.54539e-13	3.50445e-12	up in Adult
4930483O08Rik	61.0591	-2.51163	0.689421	-3.62556	0.000288338	0.00153601	up in Adult
Ptprb	479.144	-2.50979	0.324916	-7.72185	1.1465e-14	2.90709e-13	up in Adult
Ythdf1	93.9339	-2.50494	0.680809	-3.67349	0.000239261	0.00129987	up in Adult
Nup35	97.8504	-2.50474	0.701918	-3.56444	0.000364633	0.00188661	up in Adult
Upf3b	191.752	-2.50209	0.52512	-4.75919	1.9437e-06	1.67145e-05	up in Adult
Rtel1	626.414	-2.50201	0.450511	-5.55193	2.82541e-08	3.26609e-07	up in Adult
B3gnt5	252.44	-2.50108	0.469456	-5.32318	1.01968e-07	1.08395e-06	up in Adult
Commd1	948.552	-2.50051	0.391909	-6.37884	1.78439e-10	2.8504e-09	up in Adult
Pebp4	106.635	-2.49858	0.627895	-3.9789	6.92363e-05	0.000428796	up in Adult
Gm15417	55.9392	-2.49764	0.675066	-3.69541	0.000219534	0.00120581	up in Adult
Ugt8a	200.048	-2.49669	0.539098	-4.62544	3.73799e-06	3.03398e-05	up in Adult
Cacnb2	9015.66	-2.49172	0.249378	-9.99168	1.65754e-23	8.23652e-22	up in Adult
Mob3b	181.942	-2.48052	0.668288	-3.70734	0.00020945	0.00115686	up in Adult
4930586N03Rik	99.635	-2.47883	0.546538	-4.52748	5.96912e-06	4.6375e-05	up in Adult
Large1	23432.7	-2.47579	0.42752	-5.79204	6.95351e-09	8.86123e-08	up in Adult
Fam19a4	62.3095	-2.47197	0.605739	-4.06947	4.71199e-05	0.000301276	up in Adult
Ccdc81	87.2565	-2.46419	0.605055	-4.06202	4.86491e-05	0.000310248	up in Adult
Ccdc63	31.6432	-2.46377	0.79082	-3.09709	0.00195433	0.00824964	up in Adult
Rhobtb2	292.939	-2.46285	0.462675	-5.32113	1.03125e-07	1.09389e-06	up in Adult
4930590A17Rik	1613.71	-2.46215	0.44245	-5.55595	2.76107e-08	3.20171e-07	up in Adult
Rfc1	312.484	-2.46067	0.495338	-4.96509	6.86675e-07	6.3791e-06	up in Adult
Scn7a	36.5839	-2.45461	0.705256	-3.46002	0.000540132	0.0026768	up in Adult
Pira1	51.982	-2.45432	0.708464	-3.45555	0.000549171	0.00271795	up in Adult
Igbp1	181.298	-2.45381	0.417698	-5.8713	4.32381e-09	5.72692e-08	up in Adult
Prpf4b	541.875	-2.4504	0.360564	-6.79377	1.09243e-11	2.0297e-10	up in Adult
Brd7	213.036	-2.44378	0.403189	-6.05939	1.36639e-09	1.94366e-08	up in Adult
0610040F04Rik	69.9681	-2.44261	0.711451	-3.41887	0.000628828	0.00306003	up in Adult
Akirin2	246.992	-2.4422	0.409501	-5.95975	2.52621e-09	3.44457e-08	up in Adult
Lamb3	225.802	-2.44198	0.639783	-3.82384	0.00013139	0.000759714	up in Adult
Hsph1	143.955	-2.44182	0.462922	-5.26595	1.39466e-07	1.44928e-06	up in Adult
Amot	269.882	-2.43923	0.47611	-5.12236	3.01733e-07	2.96487e-06	up in Adult
Max	661.059	-2.43214	0.497323	-4.88533	1.03255e-06	9.31751e-06	up in Adult
Pnrc2	36.7508	-2.43198	0.745192	-3.24504	0.00117436	0.00527606	up in Adult
Eif4g3	11686.9	-2.42448	0.254661	-9.52016	1.72915e-21	7.50887e-20	up in Adult
Hnrnph3	151.058	-2.42366	0.498763	-4.8512	1.2272e-06	1.0934e-05	up in Adult
Mical2	408.556	-2.42263	0.596935	-4.0641	4.82173e-05	0.000308025	up in Adult
Prkdc	1443.94	-2.41794	0.314684	-7.68342	1.54901e-14	3.84861e-13	up in Adult
Rbm12b2	127.326	-2.41203	0.49143	-4.90035	9.56668e-07	8.68568e-06	up in Adult
Skint11	135.93	-2.41022	0.527907	-4.55729	5.18185e-06	4.06855e-05	up in Adult
Inpp5a	24217.4	-2.40905	0.247762	-9.72341	2.39627e-22	1.09519e-20	up in Adult
Odc1	46.7613	-2.408	0.692222	-3.46864	0.000523092	0.00260106	up in Adult
Rtkn	329.32	-2.40765	0.744313	-3.22915	0.00124158	0.00553608	up in Adult
Ntpcr	120.796	-2.4051	0.515012	-4.66062	3.15256e-06	2.60509e-05	up in Adult
Pdzrn3	459.631	-2.4028	0.499006	-4.80954	1.51276e-06	1.32393e-05	up in Adult
Ndufb4	38.5278	-2.40224	0.684311	-3.49434	0.000475231	0.0023928	up in Adult
Tshz1	127.101	-2.4005	0.674078	-3.55318	0.000380608	0.00196036	up in Adult
Ush2a	74.8973	-2.39809	0.626427	-3.81995	0.000133481	0.000770901	up in Adult
Akr1e1	99.815	-2.39465	0.635903	-3.75992	0.000169967	0.000956619	up in Adult
Efr3a	3128	-2.39381	0.284917	-8.40137	4.4131e-17	1.37001e-15	up in Adult
Bace2	35.8133	-2.392	0.747549	-3.18798	0.00143269	0.00627484	up in Adult
Runx2	209.989	-2.39009	0.460995	-5.18057	2.21214e-07	2.22537e-06	up in Adult
Uqcrb	44.9519	-2.38688	0.64183	-3.70417	0.000212084	0.00116879	up in Adult
Hopx	226.803	-2.38157	0.758081	-3.16109	0.0015718	0.00680361	up in Adult
Lrp8os2	367.055	-2.37297	0.658018	-3.60874	0.000307687	0.00162606	up in Adult
Uqcrh	150.506	-2.37113	0.439033	-5.39582	6.82099e-08	7.45425e-07	up in Adult
Pkib	81.1213	-2.36488	0.530262	-4.45222	8.49863e-06	6.44052e-05	up in Adult
Tdrkh	307.55	-2.35926	0.557421	-4.22951	2.34196e-05	0.000160184	up in Adult
Cmc4	96.1232	-2.35516	0.494738	-4.75083	2.02586e-06	1.73806e-05	up in Adult
Add3	1845.93	-2.35401	0.262723	-8.95961	3.25831e-19	1.21841e-17	up in Adult
Ppm1k	194.249	-2.35327	0.495923	-4.74395	2.09595e-06	1.79611e-05	up in Adult
Cerk	1880.84	-2.3526	0.321398	-7.31975	2.48426e-13	5.55693e-12	up in Adult
Gm19303	34.5805	-2.34781	0.759142	-3.07547	0.00210169	0.00878898	up in Adult
Smox	830.409	-2.34683	0.490839	-4.77941	1.75813e-06	1.52337e-05	up in Adult
Lair1	351.215	-2.34569	0.370881	-6.3224	2.5753e-10	4.03974e-09	up in Adult
1700018B08Rik	41.4633	-2.34315	0.709759	-3.29358	0.000989218	0.00455625	up in Adult
Cdc42bpa	13049.5	-2.34209	0.278543	-8.40821	4.16308e-17	1.30057e-15	up in Adult
Phtf2	2890.61	-2.33884	0.281949	-8.29491	1.08667e-16	3.29068e-15	up in Adult
Ssxb9	168.45	-2.33628	0.564737	-4.13302	3.58026e-05	0.000234172	up in Adult
Mrpl50	52.467	-2.33084	0.647082	-3.58523	0.000336777	0.00175543	up in Adult
Akain1	1395.62	-2.32731	0.391855	-5.93963	2.85662e-09	3.8737e-08	up in Adult
Pax1	75.1601	-2.32225	0.644202	-3.59721	0.000321648	0.00169259	up in Adult
Dmd	48197.8	-2.3217	0.217251	-10.6866	1.17566e-26	7.07689e-25	up in Adult
Calm1	435.314	-2.32016	0.44074	-5.26247	1.4213e-07	1.47488e-06	up in Adult
Zfp641	197.373	-2.31663	0.642682	-3.59946	0.000318876	0.001681	up in Adult
Pacsin2	457.366	-2.31571	0.290841	-7.95987	1.72219e-15	4.69655e-14	up in Adult
Slc39a1	55.7172	-2.31549	0.716389	-3.22515	0.00125907	0.00560732	up in Adult
Zcchc18	85.23	-2.31328	0.611134	-3.77298	0.000161309	0.000914497	up in Adult
Pigs	170.732	-2.31027	0.458299	-5.0381	4.70164e-07	4.46294e-06	up in Adult
Rsrc2	419.902	-2.30773	0.409426	-5.63382	1.76266e-08	2.13073e-07	up in Adult
Trappc13	405.375	-2.30644	0.521931	-4.41709	1.00039e-05	7.45913e-05	up in Adult
Aifm3	200.085	-2.30523	0.523592	-4.40196	1.07279e-05	7.95092e-05	up in Adult
4930578E11Rik	40.1547	-2.30498	0.733046	-3.12853	0.00175684	0.007508	up in Adult
Shmt1	40.2266	-2.29968	0.678791	-3.37043	0.0007505	0.00358728	up in Adult
Srek1	1779.92	-2.29521	0.33957	-6.75814	1.39779e-11	2.56169e-10	up in Adult
Cox7c	39.8093	-2.29519	0.665411	-3.43326	0.000596375	0.00292131	up in Adult
Samd5	293.351	-2.29156	0.694294	-3.30058	0.000964855	0.00446347	up in Adult
Fam214a	1142.09	-2.29019	0.632201	-3.62049	0.000294047	0.00155954	up in Adult
Sh2d4b	1482.16	-2.29014	0.359053	-6.37842	1.78927e-10	2.85512e-09	up in Adult
Creg1	215.317	-2.28701	0.576905	-3.96619	7.30307e-05	0.000449663	up in Adult
Fam174b	502.509	-2.28397	0.298746	-7.64334	2.11655e-14	5.18904e-13	up in Adult
Fam160a1	200.729	-2.28362	0.402452	-5.67021	1.42623e-08	1.74687e-07	up in Adult
Hspd1	136.553	-2.28265	0.547731	-4.163	3.14097e-05	0.000208571	up in Adult
Hspa14	224.427	-2.27473	0.512073	-4.43842	9.0622e-06	6.81529e-05	up in Adult
Unc80	4987.66	-2.2718	0.437894	-5.18823	2.12301e-07	2.14152e-06	up in Adult
Slc3a1	248.507	-2.27139	0.423771	-5.35715	8.45461e-08	9.07216e-07	up in Adult
Tmem191c	203.88	-2.26817	0.478796	-4.73358	2.20597e-06	1.88603e-05	up in Adult
Atp5h	158.947	-2.26396	0.489357	-4.62064	3.82565e-06	3.09733e-05	up in Adult
Upk3bl	336.026	-2.26087	0.549461	-4.11246	3.9146e-05	0.000253909	up in Adult
Impg1	58.6398	-2.25963	0.702237	-3.21024	0.00132624	0.00586936	up in Adult
Gm12610	43.3815	-2.25665	0.697082	-3.22647	0.00125327	0.00558359	up in Adult
Gm2762	239.292	-2.25623	0.455549	-4.95051	7.40189e-07	6.85045e-06	up in Adult
Zranb2	1203.39	-2.25225	0.405956	-5.5467	2.91118e-08	3.35477e-07	up in Adult
Impact	657.722	-2.25116	0.437937	-5.13903	2.76162e-07	2.72809e-06	up in Adult
Dcaf12	154.572	-2.24939	0.420516	-5.34498	9.04289e-08	9.66141e-07	up in Adult
Gm27162	102.843	-2.24753	0.658693	-3.41036	0.000648764	0.00314671	up in Adult
St8sia3os	37.3854	-2.24644	0.710882	-3.14516	0.00165998	0.00714088	up in Adult
1700113H08Rik	36.9715	-2.24606	0.703388	-3.17107	0.00151878	0.00661279	up in Adult
Fkbp2	63.1495	-2.24068	0.580535	-3.85097	0.000117649	0.000689915	up in Adult
Hepacam2	38.6231	-2.23902	0.721383	-3.09068	0.00199697	0.00839613	up in Adult
Coq8a	58.1878	-2.23502	0.676669	-3.29401	0.000987704	0.00455069	up in Adult
Tmco1	102.992	-2.23478	0.621897	-3.5865	0.000335149	0.00174934	up in Adult
Scn2b	104.891	-2.23286	0.445641	-5.00388	5.61874e-07	5.28269e-06	up in Adult
Dlc1	1073.88	-2.2326	0.424641	-5.2574	1.46105e-07	1.50979e-06	up in Adult
Prkag3	100.259	-2.22889	0.559074	-3.98189	6.83699e-05	0.000423785	up in Adult
Clk4	1147.52	-2.22679	0.303766	-7.32952	2.30976e-13	5.19012e-12	up in Adult
Strn3	9868.88	-2.22521	0.253717	-8.77034	1.78132e-18	6.25065e-17	up in Adult
Esf1	268.694	-2.21879	0.479053	-4.62845	3.68412e-06	2.99585e-05	up in Adult
Crot	199.288	-2.21672	0.436327	-5.07756	3.82314e-07	3.69055e-06	up in Adult
Rragb	222.657	-2.21215	0.415776	-5.31674	1.05642e-07	1.11899e-06	up in Adult
Usp46	969.436	-2.211	0.309512	-7.14265	9.15483e-13	1.93388e-11	up in Adult
Tdrp	169.576	-2.21081	0.398657	-5.54227	2.98578e-08	3.43538e-07	up in Adult
Meg3	41128.7	-2.20782	0.331166	-6.66678	2.61479e-11	4.65942e-10	up in Adult
Tmx3	476.838	-2.20678	0.292298	-7.54755	4.43527e-14	1.05421e-12	up in Adult
Cbx6	181.168	-2.20553	0.679788	-3.24281	0.00118359	0.0053143	up in Adult
Trp63	84.5448	-2.19945	0.641641	-3.42634	0.000611765	0.00298583	up in Adult
Ice2	296.668	-2.19821	0.668293	-3.29103	0.00099822	0.00459057	up in Adult
Arhgef37	522.914	-2.19668	0.45203	-4.85971	1.17557e-06	1.05119e-05	up in Adult
Rpa1	341.206	-2.19244	0.330291	-6.63541	3.23601e-11	5.70463e-10	up in Adult
Zw10	70.4315	-2.1882	0.612852	-3.56628	0.000362089	0.0018741	up in Adult
Cbr3	12644.3	-2.18712	0.525256	-4.16284	3.1432e-05	0.000208626	up in Adult
Tns1	274.429	-2.18301	0.657424	-3.31023	0.000932181	0.00432646	up in Adult
Tmcc3	2803.93	-2.18128	0.340709	-6.40202	1.53331e-10	2.46796e-09	up in Adult
Ppp1r1b	136.579	-2.18116	0.627866	-3.47511	0.000510647	0.00254344	up in Adult
D6Ertd474e	119.048	-2.17605	0.502686	-4.32525	1.52359e-05	0.000109098	up in Adult
Wdr3	63.2996	-2.17539	0.558416	-3.88463	0.000102485	0.00060899	up in Adult
Fech	210.619	-2.1751	0.559877	-3.88149	0.000103819	0.000616418	up in Adult
Col16a1	142.167	-2.1731	0.543142	-4.00222	6.27519e-05	0.000391255	up in Adult
D1Ertd622e	135.085	-2.17054	0.410801	-5.27774	1.30788e-07	1.3658e-06	up in Adult
Kif21a	6438.33	-2.16993	0.298952	-7.25806	3.92674e-13	8.57629e-12	up in Adult
Tpcn2	230.748	-2.16775	0.526383	-4.11673	3.84288e-05	0.000249585	up in Adult
Tmem164	2083.41	-2.16723	0.319825	-6.77618	1.23398e-11	2.2699e-10	up in Adult
Hsp90ab1	308.403	-2.16699	0.425139	-5.09294	3.52552e-07	3.42558e-06	up in Adult
Mtm1	598.853	-2.16446	0.52867	-4.09512	4.21955e-05	0.000272376	up in Adult
Ptma	83.377	-2.16137	0.661768	-3.26071	0.00111133	0.00503567	up in Adult
Cdk5r1	104.209	-2.16132	0.654111	-3.29546	0.000982614	0.00453006	up in Adult
Dolpp1	104.509	-2.16117	0.547658	-3.94233	8.06941e-05	0.00049275	up in Adult
Syt4	284.944	-2.15921	0.560641	-3.84684	0.000119653	0.00069834	up in Adult
Ifngr2	170.334	-2.15806	0.426982	-5.05029	4.41137e-07	4.20358e-06	up in Adult
Mpzl1	1499.25	-2.15806	0.420913	-5.12686	2.94611e-07	2.89874e-06	up in Adult
Galnt9	2415.15	-2.15583	0.363764	-5.92589	3.10606e-09	4.18132e-08	up in Adult
Mpc2	217.386	-2.15391	0.456631	-4.71485	2.4189e-06	2.04681e-05	up in Adult
Fbxo3	673.051	-2.15242	0.361497	-5.95333	2.62742e-09	3.57928e-08	up in Adult
Prr5l	182.668	-2.14927	0.482572	-4.45147	8.52837e-06	6.45975e-05	up in Adult
Afg3l2	894.216	-2.14716	0.390638	-5.49573	3.89095e-08	4.39826e-07	up in Adult
Lrrc69	78.3742	-2.14638	0.577183	-3.71197	0.000205655	0.00113802	up in Adult
Gprc5b	568.123	-2.14389	0.460856	-4.65352	3.26322e-06	2.68696e-05	up in Adult
Osbp2	1344.95	-2.14197	0.466362	-4.59251	4.37945e-06	3.51495e-05	up in Adult
A330033J07Rik	344.618	-2.14165	0.325456	-6.57861	4.74862e-11	8.14804e-10	up in Adult
Lrpprc	1647.92	-2.13943	0.273582	-7.81959	5.29963e-15	1.38652e-13	up in Adult
2310022B05Rik	598.057	-2.13757	0.365332	-5.8495	4.93062e-09	6.48425e-08	up in Adult
Immp2l	6240.3	-2.13464	0.258739	-8.25004	1.58339e-16	4.73674e-15	up in Adult
Il12rb2	142.703	-2.1223	0.583594	-3.63714	0.000275686	0.00147644	up in Adult
Srp54a	248.136	-2.12228	0.349876	-6.06279	1.33782e-09	1.90852e-08	up in Adult
Ythdc1	598.638	-2.12157	0.421704	-5.0305	4.89196e-07	4.63765e-06	up in Adult
Fbxw7	1391.44	-2.11473	0.364197	-5.80635	6.38509e-09	8.21464e-08	up in Adult
Pparg	384.775	-2.11308	0.376492	-5.61145	2.00644e-08	2.39995e-07	up in Adult
Lztfl1	354.029	-2.11213	0.482074	-4.37988	1.18745e-05	8.7264e-05	up in Adult
Ppip5k1	900.998	-2.11147	0.233134	-9.05599	1.35334e-19	5.23246e-18	up in Adult
Serinc2	1025.45	-2.10952	0.472832	-4.46181	8.12692e-06	6.20967e-05	up in Adult
Prr13	55.8273	-2.10914	0.594484	-3.53447	0.000408598	0.00208855	up in Adult
Dnmbp	971.938	-2.10683	0.458319	-4.5979	4.26777e-06	3.43276e-05	up in Adult
Hpn	125.181	-2.10591	0.618082	-3.40675	0.000657419	0.00318139	up in Adult
Inpp5b	1564.45	-2.10388	0.326397	-6.44568	1.15083e-10	1.87682e-09	up in Adult
Rbm39	114.844	-2.10185	0.497179	-4.22255	2.41558e-05	0.000164611	up in Adult
Ryr2	2822.02	-2.10156	0.439217	-4.78565	1.70434e-06	1.48284e-05	up in Adult
Npm1	175.545	-2.0995	0.576784	-3.63595	0.000276961	0.00148166	up in Adult
Gpr180	728.094	-2.09783	0.318931	-6.57683	4.80591e-11	8.21778e-10	up in Adult
Thoc2	2265.18	-2.09646	0.225767	-9.28552	1.60913e-20	6.60057e-19	up in Adult
Wdr37	2097.13	-2.09394	0.305921	-6.84471	7.66292e-12	1.44816e-10	up in Adult
Nox1	97.4858	-2.09321	0.518953	-4.02717	5.64523e-05	0.00035557	up in Adult
Clk1	569.766	-2.09017	0.391943	-5.33103	9.7658e-08	1.04112e-06	up in Adult
Loxhd1	91.8617	-2.08337	0.575968	-3.61021	0.000305944	0.00161974	up in Adult
Col19a1	868.442	-2.0827	0.341893	-6.0914	1.1193e-09	1.61075e-08	up in Adult
4930474G06Rik	150.296	-2.07925	0.498243	-4.1682	3.07008e-05	0.000204782	up in Adult
Dnmt1	240.002	-2.07895	0.466741	-4.45391	8.43222e-06	6.4033e-05	up in Adult
Snhg14	2458.79	-2.07876	0.246523	-8.43187	3.40175e-17	1.06949e-15	up in Adult
Zfp839	169.081	-2.07664	0.531325	-3.90803	9.30503e-05	0.000559662	up in Adult
Slc16a1	185.616	-2.0751	0.666073	-3.11947	0.00181178	0.00770943	up in Adult
Fam135b	3560.57	-2.06881	0.262722	-7.87432	3.42597e-15	9.15736e-14	up in Adult
Stard7	643.777	-2.06829	0.42985	-4.81116	1.50055e-06	1.31403e-05	up in Adult
Ssb	286.648	-2.06633	0.362682	-5.69472	1.23575e-08	1.52492e-07	up in Adult
Calr	302.809	-2.06244	0.489413	-4.21151	2.53668e-05	0.0001716	up in Adult
Ints6	2085.4	-2.06071	0.266431	-7.73416	1.04089e-14	2.64383e-13	up in Adult
Flvcr1	328.326	-2.06029	0.556096	-3.70484	0.000211521	0.00116659	up in Adult
Ttll4	2025.13	-2.05824	0.332337	-6.19315	5.89723e-10	8.82974e-09	up in Adult
H2-D1	310.047	-2.05687	0.444139	-4.63121	3.63535e-06	2.95944e-05	up in Adult
Cecr2	294.781	-2.05678	0.593495	-3.46791	0.000524519	0.00260728	up in Adult
Zfp715	199.631	-2.05671	0.653681	-3.14494	0.0016612	0.00714256	up in Adult
Kcna1	460.228	-2.05669	0.437133	-4.70516	2.53664e-06	2.13545e-05	up in Adult
Pigf	201.877	-2.05565	0.442749	-4.64003	3.48361e-06	2.8453e-05	up in Adult
Prkar1a	399.587	-2.04866	0.362358	-5.65147	1.59082e-08	1.92931e-07	up in Adult
Snrnp48	275.185	-2.04674	0.480028	-4.2622	2.02422e-05	0.000140726	up in Adult
Prmt8	7531.71	-2.04153	0.339809	-6.00802	1.87801e-09	2.61123e-08	up in Adult
Phkg1	986.175	-2.04104	0.433589	-4.70681	2.51625e-06	2.12432e-05	up in Adult
Atp6v1b1	181.045	-2.03507	0.433709	-4.69048	2.72568e-06	2.28162e-05	up in Adult
Oas2	199.01	-2.03349	0.569804	-3.57102	0.000355596	0.0018439	up in Adult
Tra2a	1041.68	-2.03327	0.399493	-5.08919	3.59599e-07	3.48719e-06	up in Adult
Sphkap	3071.88	-2.03174	0.331912	-6.12128	9.28261e-10	1.35559e-08	up in Adult
Ptpn13	2060.5	-2.02912	0.309498	-6.5563	5.51592e-11	9.32418e-10	up in Adult
Nek7	222.64	-2.02878	0.579528	-3.4937	0.000476369	0.00239771	up in Adult
Zfp758	98.1405	-2.02851	0.557594	-3.63572	0.000277201	0.00148241	up in Adult
Nfatc2	1247.25	-2.02644	0.254958	-7.94766	1.90065e-15	5.15472e-14	up in Adult
Cemip	860.278	-2.02499	0.424891	-4.76982	1.84392e-06	1.58841e-05	up in Adult
Sfxn5	1718.01	-2.02406	0.31093	-6.50971	7.52951e-11	1.25701e-09	up in Adult
Srek1ip1	119.229	-2.02286	0.467302	-4.32453	1.52861e-05	0.000109404	up in Adult
Fgd3	2214.45	-2.02276	0.233914	-8.64712	5.28154e-18	1.77345e-16	up in Adult
Kcnd3	8962.94	-2.01883	0.262361	-7.69478	1.41742e-14	3.5395e-13	up in Adult
Laptm4b	544.954	-2.01737	0.27091	-7.44576	9.63873e-14	2.23365e-12	up in Adult
Hmgb1	46.6931	-2.01583	0.625656	-3.2133	0.00131217	0.00581581	up in Adult
Haao	157.145	-2.01439	0.450908	-4.46522	7.99875e-06	6.12438e-05	up in Adult
Mtx2	752.893	-2.00956	0.29611	-6.78605	1.15243e-11	2.12783e-10	up in Adult
Rhoq	507.705	-2.00944	0.269554	-7.45305	9.12036e-14	2.1235e-12	up in Adult
Ppig	943.463	-2.00672	0.496047	-4.0428	5.28169e-05	0.000334952	up in Adult
Abhd6	1008.55	-2.00645	0.452455	-4.43407	9.24723e-06	6.94034e-05	up in Adult
Taf11	92.1049	-2.00394	0.603183	-3.32075	0.000897748	0.00417783	up in Adult
Rnf146	337.126	-2.00316	0.484341	-4.13415	3.56264e-05	0.000233123	up in Adult
Tpk1	959.369	-2.00288	0.300337	-6.66801	2.59294e-11	4.63164e-10	up in Adult
Tcp1	67.0973	-2.00046	0.651109	-3.06636	0.00216683	0.00903843	up in Adult
Tbkbp1	223.226	2.00221	0.522066	3.83524	0.000125439	0.000728148	up in P0
Itga5	334.224	2.00402	0.417414	4.80265	1.56578e-06	1.3663e-05	up in P0
Rapgef6	2300.12	2.00612	0.520496	3.85259	0.000116876	0.000685697	up in P0
Ttc39a	144.223	2.00884	0.535502	3.75104	0.000176106	0.000988167	up in P0
Abtb2	166.507	2.00919	0.45303	4.43518	9.19956e-06	6.91157e-05	up in P0
Tmem163	556.733	2.00956	0.359279	5.5922	2.2421e-08	2.66461e-07	up in P0
Fam83h	50.7634	2.01083	0.660347	3.04466	0.00232944	0.00959777	up in P0
Pomt1	134.154	2.01099	0.494443	4.0639	4.82601e-05	0.000308165	up in P0
Scrt1	145.973	2.01353	0.617866	3.25939	0.00111652	0.00505765	up in P0
9530026P05Rik	106.789	2.01375	0.57038	3.52382	0.000425369	0.00216307	up in P0
Gabra5	115.272	2.01579	0.613615	3.27761	0.0010469	0.00478031	up in P0
Hdac1	193.901	2.01619	0.470734	4.28222	1.85038e-05	0.000130045	up in P0
Natd1	53.3251	2.0169	0.591569	3.40457	0.000662679	0.00320475	up in P0
Gm27021	183.127	2.01783	0.454152	4.442	8.91257e-06	6.72325e-05	up in P0
Adamts19	192.634	2.01816	0.413892	4.87382	1.09458e-06	9.82336e-06	up in P0
Rfx1	322.847	2.01847	0.399915	5.04578	4.51685e-07	4.29856e-06	up in P0
Rerg	108.224	2.0188	0.466155	4.32605	1.51806e-05	0.000108806	up in P0
Sec16a	450.571	2.02076	0.443079	4.56003	5.11467e-06	4.03721e-05	up in P0
Gps1	59.3789	2.02094	0.642107	3.14173	0.00167952	0.00721088	up in P0
Adgrl2	6469.07	2.02127	0.375722	5.37968	7.46185e-08	8.09487e-07	up in P0
Ntrk2	542.369	2.02339	0.467371	4.32742	1.50868e-05	0.000108291	up in P0
Zc3h7b	439.342	2.02543	0.55627	3.64078	0.000271812	0.00146045	up in P0
Myo16	4646.49	2.02845	0.227442	8.91858	4.7231e-19	1.74849e-17	up in P0
Ppp1r14c	764.108	2.02933	0.303281	6.69048	2.22439e-11	3.99257e-10	up in P0
Slc39a6	102.406	2.03336	0.627077	3.24121	0.00119022	0.0053376	up in P0
B3gat1	1418.95	2.03367	0.380078	5.35098	8.7479e-08	9.35395e-07	up in P0
Abcb9	116.43	2.03548	0.537898	3.78451	0.000154012	0.000876149	up in P0
Nipa1	643.962	2.03958	0.35085	5.81234	6.16065e-09	7.9466e-08	up in P0
Ssbp4	85.5321	2.04154	0.585018	3.48779	0.000487037	0.00244476	up in P0
Rec114	495.699	2.04197	0.500447	4.08123	4.47981e-05	0.000288046	up in P0
Prkar2b	776.241	2.04247	0.281876	7.24522	4.31728e-13	9.37395e-12	up in P0
Igsf21	156.574	2.04259	0.524247	3.89322	9.89215e-05	0.000590895	up in P0
Efcab12	65.5122	2.04316	0.648634	3.13642	0.00171027	0.0073344	up in P0
Bcl11b	87.6205	2.04394	0.567756	3.59068	0.000329814	0.0017282	up in P0
Gm14634	260.062	2.04679	0.452918	4.51889	6.21637e-06	4.81695e-05	up in P0
Scrib	249.78	2.04696	0.485842	4.21313	2.5186e-05	0.000170689	up in P0
Csf2ra	239.531	2.04758	0.45868	4.46227	8.10962e-06	6.19965e-05	up in P0
Ralyl	10225.5	2.05066	0.218069	9.40373	5.26637e-21	2.22813e-19	up in P0
Ezh1	275.018	2.05229	0.367338	5.5853	2.33292e-08	2.76589e-07	up in P0
Pdzd4	798.174	2.05276	0.294381	6.97241	3.11559e-12	6.15142e-11	up in P0
Lrig1	196.731	2.05321	0.48678	4.2171	2.47459e-05	0.000168014	up in P0
Sbf1	465.614	2.05379	0.396601	5.17781	2.24503e-07	2.25233e-06	up in P0
Crb1	245.948	2.05384	0.468474	4.37906	1.19191e-05	8.74618e-05	up in P0
Wdfy3	3277.13	2.05486	0.344017	5.97313	2.32739e-09	3.19111e-08	up in P0
Gtdc1	5345.18	2.05678	0.280915	7.3217	2.44854e-13	5.48531e-12	up in P0
Asap2	987.716	2.05681	0.29968	6.86277	6.75367e-12	1.28545e-10	up in P0
1700123O12Rik	217.712	2.05775	0.593157	3.46753	0.000525261	0.00260921	up in P0
Robo2	13194.4	2.05789	0.287398	7.16026	8.05226e-13	1.71319e-11	up in P0
Lrrc4c	22856	2.05887	0.244997	8.40356	4.33158e-17	1.34752e-15	up in P0
Grik2	1202.91	2.06076	0.232167	8.87547	6.96395e-19	2.52133e-17	up in P0
Ppfibp2	61.3664	2.06237	0.654449	3.1301	0.00174746	0.00747441	up in P0
Lca5	378.165	2.06278	0.455235	4.5311	5.86785e-06	4.56121e-05	up in P0
Alk	475.404	2.06357	0.333899	6.17869	6.46344e-10	9.63853e-09	up in P0
Zeb2	380.77	2.06386	0.640334	3.22793	0.0012469	0.00555814	up in P0
Enox1	7233.32	2.0654	0.199303	10.363	3.65373e-25	2.034e-23	up in P0
Dbndd1	157.067	2.06858	0.479271	4.31409	1.60265e-05	0.000113932	up in P0
Dhx57	1333.84	2.071	0.24904	8.31538	9.14614e-17	2.77533e-15	up in P0
Rtl4	425.841	2.07258	0.301831	6.86462	6.66668e-12	1.27217e-10	up in P0
Acaa2	107.738	2.07319	0.6169	3.35988	0.000779756	0.00370498	up in P0
Sh3bgrl	374.532	2.07591	0.609601	3.40229	0.000668241	0.00322744	up in P0
Arhgef4	436.973	2.07593	0.358384	5.79235	6.94094e-09	8.85284e-08	up in P0
Lpcat3	176.86	2.07744	0.396804	5.23292	1.66852e-07	1.70868e-06	up in P0
1110008L16Rik	412.736	2.07862	0.66516	3.12641	0.00176956	0.00755148	up in P0
Gpaa1	59.0022	2.08124	0.681809	3.04947	0.00229243	0.00947425	up in P0
Glipr2	42.6891	2.08344	0.636959	3.26249	0.00110437	0.00500805	up in P0
Tnrc18	2468.87	2.08359	0.381069	5.46777	4.55733e-08	5.09321e-07	up in P0
Xkr7	201.771	2.08453	0.470804	4.42599	9.60003e-06	7.18329e-05	up in P0
Gm15997	108.835	2.08619	0.578152	3.60897	0.000307411	0.00162576	up in P0
Alg2	164.13	2.08737	0.542364	3.84603	0.000120048	0.000700146	up in P0
Zfp354c	244.273	2.08793	0.638035	3.27002	0.00107539	0.00489584	up in P0
Csmd1	2236.76	2.08863	0.333656	6.26017	3.84569e-10	5.90736e-09	up in P0
Fgf3	181.699	2.09049	1.29768	3.53489	0.00040794	0.00208663	up in P0
Nectin2	128.965	2.09111	0.535258	3.90542	9.40616e-05	0.000565056	up in P0
A530058N18Rik	201.718	2.09129	0.616638	3.39108	0.000696177	0.00334925	up in P0
Tmem240	61.0924	2.09304	0.654978	3.19482	0.00139917	0.00614438	up in P0
Ddx41	147.59	2.09414	0.53855	3.88768	0.000101208	0.000602365	up in P0
Caly	82.907	2.09465	0.555851	3.76433	0.000166994	0.000941319	up in P0
Smad5	416.768	2.09486	0.456843	4.58339	4.57494e-06	3.65403e-05	up in P0
Dnaaf5	153.677	2.09623	0.402499	5.20464	1.94377e-07	1.96876e-06	up in P0
Rab3ip	58.9727	2.09627	0.644865	3.24127	0.00118998	0.0053376	up in P0
Dot1l	523.078	2.09849	0.581623	3.61158	0.000304339	0.00161182	up in P0
Tgfbr2	184.738	2.09939	0.462303	4.53517	5.7558e-06	4.48825e-05	up in P0
Dpp6	14862.8	2.10034	0.209256	10.0372	1.04653e-23	5.25322e-22	up in P0
Usp22	248.801	2.10073	0.474077	4.42928	9.45461e-06	7.08163e-05	up in P0
Lzts3	149.511	2.10082	0.529209	3.96701	7.2781e-05	0.000448498	up in P0
Mcrs1	102.001	2.1011	0.675685	3.11134	0.00186243	0.00789999	up in P0
Gcn1l1	270.373	2.10344	0.446961	4.70427	2.54772e-06	2.14325e-05	up in P0
Cpd	177.622	2.10411	0.408826	5.14296	2.70445e-07	2.67518e-06	up in P0
Impdh1	112.43	2.10722	0.59155	3.55962	0.000371395	0.00191671	up in P0
Xxylt1	315.73	2.10759	0.553017	3.81281	0.000137394	0.000791031	up in P0
Fam69b	404.765	2.10894	0.517737	4.07531	4.59523e-05	0.000294912	up in P0
Cyp4f17	105.167	2.10918	0.583417	3.60989	0.000306322	0.00162084	up in P0
Grm4	403.055	2.11009	0.492441	4.28517	1.82601e-05	0.000128393	up in P0
Gpr45	264.17	2.1105	0.487424	4.32795	1.50503e-05	0.000108082	up in P0
Nme6	90.0506	2.11088	0.509765	4.13712	3.51698e-05	0.000230338	up in P0
Katnb1	94.1768	2.11541	0.582222	3.62942	0.000284062	0.00151527	up in P0
Abcd1	137.571	2.11555	0.414318	5.10274	3.34775e-07	3.25927e-06	up in P0
2700054A10Rik	213.004	2.11656	0.388096	5.45192	4.98283e-08	5.5293e-07	up in P0
Tiam1	818.426	2.11788	0.418298	5.06403	4.10478e-07	3.94187e-06	up in P0
Foxp2	25679.5	2.11818	0.277591	7.63049	2.33858e-14	5.66771e-13	up in P0
Pcbp3	878.879	2.11977	0.437225	4.84792	1.24766e-06	1.1103e-05	up in P0
Tnk2	514.844	2.12005	0.488394	4.34256	1.40833e-05	0.000101631	up in P0
Prex1	111.334	2.12075	0.516038	4.10862	3.98024e-05	0.000257941	up in P0
Rbck1	408.952	2.12085	0.304364	6.96655	3.24813e-12	6.40456e-11	up in P0
Atp11a	795.499	2.12258	0.399076	5.3183	1.04742e-07	1.11025e-06	up in P0
Fam129b	153.669	2.12267	0.560231	3.78548	0.000153413	0.000873074	up in P0
B4galnt1	138.611	2.12346	0.566906	3.74416	0.000181001	0.00101487	up in P0
Pik3r1	476.339	2.12708	0.370489	5.73992	9.47236e-09	1.19072e-07	up in P0
Zdbf2	189.338	2.13335	0.616177	3.46168	0.000536805	0.00266222	up in P0
Arhgef3	215.779	2.1335	0.451814	4.72207	2.33455e-06	1.98109e-05	up in P0
Pgap1	538.747	2.13391	0.495317	4.30864	1.64261e-05	0.000116437	up in P0
Tpra1	221.324	2.13589	0.488238	4.37386	1.22069e-05	8.9352e-05	up in P0
Osbpl10	1745.13	2.13674	0.24561	8.69935	3.33781e-18	1.13886e-16	up in P0
Pik3r2	52.5168	2.13693	0.652588	3.27319	0.0010634	0.00484516	up in P0
Ica1l	320.84	2.13737	0.371921	5.74511	9.18639e-09	1.15871e-07	up in P0
Gprin3	459.106	2.13747	0.390648	5.47079	4.48034e-08	5.01473e-07	up in P0
Gm20754	397.915	2.13848	0.398558	5.36305	8.18292e-08	8.81255e-07	up in P0
Sema5a	397.266	2.13861	0.30479	7.01525	2.29536e-12	4.59345e-11	up in P0
Anks6	568.736	2.14131	0.31569	6.78237	1.1822e-11	2.18008e-10	up in P0
Rora	102722	2.14171	0.285025	7.51403	5.73323e-14	1.35187e-12	up in P0
Prune2	121.649	2.14463	0.609892	3.5106	0.000447093	0.00226498	up in P0
Tmem108	660.873	2.14863	0.256932	8.36093	6.22251e-17	1.91168e-15	up in P0
Wdr20	338.117	2.14917	0.587724	3.65407	0.000258112	0.00139087	up in P0
Chn2	203.805	2.14961	0.551749	3.89071	9.99533e-05	0.000595857	up in P0
Pex6	112.866	2.15009	0.570989	3.76516	0.000166443	0.00093893	up in P0
Lamtor1	51.7201	2.15464	0.678401	3.16829	0.0015334	0.00666273	up in P0
Dnajc21	431.782	2.15576	0.415889	5.184	2.17177e-07	2.18921e-06	up in P0
Rapgef1	1589.48	2.15744	0.241818	8.9215	4.60017e-19	1.70725e-17	up in P0
Fam124a	446.272	2.16155	0.387172	5.58177	2.38079e-08	2.81486e-07	up in P0
Pdia5	142.514	2.16552	0.590093	3.669	0.000243505	0.00132033	up in P0
Zdhhc23	172.381	2.16897	0.424781	5.10318	3.33992e-07	3.25379e-06	up in P0
Nova2	1481.58	2.16934	0.408038	5.31657	1.05744e-07	1.11927e-06	up in P0
Esrrb	2544.98	2.17056	0.306099	7.09125	1.3291e-12	2.74879e-11	up in P0
C2cd2	672.01	2.17131	0.462989	4.68995	2.73272e-06	2.28622e-05	up in P0
BC024978	160.563	2.17482	0.665366	3.2752	0.00105588	0.00481535	up in P0
Zfp523	452.581	2.17485	0.396951	5.47763	4.31055e-08	4.84209e-07	up in P0
Crtac1	89.7283	2.17676	0.591711	3.67672	0.000236249	0.0012863	up in P0
Obscn	62.1306	2.17855	0.604739	3.59674	0.000322227	0.00169444	up in P0
Tmem266	128.626	2.18025	0.441443	4.93372	8.06801e-07	7.40676e-06	up in P0
Usp30	199.857	2.18173	0.599436	3.64157	0.000270982	0.00145651	up in P0
Ncdn	158.267	2.18249	0.463514	4.70626	2.52302e-06	2.12712e-05	up in P0
Pla2g15	73.5625	2.18261	0.632027	3.45103	0.000558448	0.0027565	up in P0
Zc3hav1l	53.0275	2.18325	0.611685	3.56144	0.000368829	0.00190632	up in P0
Dtna	4802.74	2.18364	0.26523	8.23293	1.8269e-16	5.43226e-15	up in P0
Slc7a5	35.8474	2.18515	0.698529	3.11899	0.00181471	0.00771884	up in P0
Gckr	1327.08	2.18589	0.259961	8.40845	4.15458e-17	1.30057e-15	up in P0
Adgrb1	428.293	2.18601	0.429582	5.08906	3.59848e-07	3.48732e-06	up in P0
Mcc	980.689	2.1867	0.253116	8.63869	5.68603e-18	1.90495e-16	up in P0
Sh3pxd2b	124.486	2.18674	0.534056	4.08678	4.37407e-05	0.000281614	up in P0
Smurf1	727.791	2.18902	0.272594	8.02922	9.80931e-16	2.73038e-14	up in P0
2010300C02Rik	125.735	2.18932	0.424381	5.15587	2.52449e-07	2.51228e-06	up in P0
Zcchc14	555.685	2.19409	0.592451	3.70484	0.000211527	0.00116659	up in P0
Lpcat1	154.289	2.19436	0.433401	5.0589	4.21692e-07	4.02866e-06	up in P0
Elavl3	3536.52	2.19438	0.307066	7.14639	8.90913e-13	1.88736e-11	up in P0
Gm5916	114.016	2.19534	0.519824	4.2199	2.44408e-05	0.000166247	up in P0
Arl8a	594.853	2.19597	0.374993	5.85548	4.75622e-09	6.2716e-08	up in P0
Sipa1l3	964.877	2.19617	0.546533	4.0188	5.84956e-05	0.000366414	up in P0
Tcf4	278.997	2.1971	0.578553	3.79489	0.000147709	0.000844505	up in P0
Olfm1	498.674	2.19769	0.446975	4.91653	8.8091e-07	8.04721e-06	up in P0
Klc2	282.764	2.19816	0.438456	5.01218	5.38172e-07	5.07595e-06	up in P0
Nav3	5929.99	2.19919	0.251954	8.72839	2.58318e-18	8.93733e-17	up in P0
Bcl11a	12334	2.20043	0.229502	9.58794	8.98601e-22	3.96026e-20	up in P0
Nadk2	83.4824	2.20212	0.635086	3.46167	0.000536831	0.00266222	up in P0
Arpc5	121.542	2.20515	0.522367	4.21744	2.47088e-05	0.000167839	up in P0
Abcb10	175.371	2.20544	0.509828	4.32296	1.53952e-05	0.000110025	up in P0
Plcl2	276.756	2.20655	0.402872	5.47324	4.41886e-08	4.94965e-07	up in P0
Zbtb7c	304.328	2.20733	0.461498	4.78165	1.73859e-06	1.50821e-05	up in P0
Slc16a7	184.891	2.21409	0.40876	5.41205	6.23065e-08	6.82123e-07	up in P0
Vasn	482.066	2.21601	0.330486	6.70418	2.02536e-11	3.65305e-10	up in P0
Pard3	2418.95	2.21674	0.515782	4.29643	1.7357e-05	0.000122524	up in P0
Rdx	462.742	2.22256	0.390565	5.69057	1.26614e-08	1.55982e-07	up in P0
Cog1	269.622	2.22858	0.668232	3.34232	0.000830825	0.00390939	up in P0
Cttnbp2nl	367.007	2.2287	0.366059	6.0866	1.15331e-09	1.65647e-08	up in P0
Cfap300	155.165	2.22951	0.501977	4.43793	9.08294e-06	6.82742e-05	up in P0
Nphp1	125.248	2.23519	0.731571	3.05718	0.00223433	0.00926518	up in P0
Slc25a22	141.299	2.23543	0.586216	3.81229	0.000137688	0.000792414	up in P0
Map2k6	517.61	2.23897	0.301589	7.42248	1.14944e-13	2.62668e-12	up in P0
Zfp653	188.409	2.24414	0.578504	3.87873	0.000105005	0.000622461	up in P0
Ikzf4	234.527	2.24491	0.362502	6.18982	6.02338e-10	9.00951e-09	up in P0
Pam	161.404	2.24656	0.67471	3.32693	0.000878084	0.00409791	up in P0
Slc6a9	52.9597	2.24659	0.628734	3.56767	0.00036017	0.00186613	up in P0
Atp2b4	47.3216	2.25104	0.718649	3.1146	0.00184194	0.00782428	up in P0
Adamtsl3	189.603	2.25363	0.534186	4.21537	2.49368e-05	0.000169154	up in P0
Ppm1f	148.89	2.25749	0.427412	5.27811	1.30525e-07	1.36402e-06	up in P0
4933405E24Rik	263.903	2.2576	0.360388	6.26247	3.78932e-10	5.83287e-09	up in P0
Tmem258	58.1984	2.25827	0.710261	3.16683	0.00154108	0.0066899	up in P0
Grk2	209.528	2.25885	0.715491	3.16358	0.0015584	0.00675552	up in P0
Bcl7b	166.576	2.26078	0.583491	3.8748	0.000106711	0.000631063	up in P0
Parva	175.791	2.26285	0.589765	3.83241	0.000126896	0.000736318	up in P0
Fkbp5	275.281	2.26332	0.589126	3.83973	0.00012317	0.000716382	up in P0
Zfp647	41.2579	2.26351	0.725434	3.1067	0.00189191	0.0080067	up in P0
Deaf1	777.086	2.26407	0.354068	6.39382	1.61791e-10	2.59567e-09	up in P0
Mib2	201.349	2.26676	0.455577	4.97266	6.60407e-07	6.14664e-06	up in P0
Dennd6b	1107.91	2.2669	0.277505	8.1685	3.12258e-16	9.07781e-15	up in P0
Foxred2	62.3816	2.26744	0.664182	3.39778	0.000679358	0.00327579	up in P0
Rmst	92.9061	2.26826	0.530564	4.26289	2.01798e-05	0.000140358	up in P0
Npdc1	664.299	2.27022	0.26326	8.6218	6.59093e-18	2.19322e-16	up in P0
Hsf1	658.691	2.27157	0.434559	5.22817	1.71194e-07	1.74951e-06	up in P0
Mtch2	333.602	2.27183	0.352739	6.44073	1.18901e-10	1.9327e-09	up in P0
Ppp1r10	347.965	2.2732	0.383148	5.93134	3.0047e-09	4.05593e-08	up in P0
Bscl2	107.083	2.27386	0.681436	3.3318	0.00086286	0.00403997	up in P0
Kcnq4	182.606	2.27595	0.521442	4.36283	1.28389e-05	9.34699e-05	up in P0
Shroom3	862.997	2.28565	0.330766	6.90983	4.85245e-12	9.40511e-11	up in P0
Robo1	346.796	2.28609	0.487887	4.68149	2.84792e-06	2.37856e-05	up in P0
Luzp2	973.535	2.28653	0.312841	7.30816	2.7082e-13	6.02148e-12	up in P0
Rell2	377.105	2.28822	0.3987	5.73834	9.5608e-09	1.20082e-07	up in P0
Gtf2ird2	315.685	2.29279	0.420987	5.44447	5.1959e-08	5.73758e-07	up in P0
Tesk1	60.9465	2.29316	0.620067	3.6899	0.000224341	0.00123018	up in P0
Dcakd	211.969	2.29318	0.59638	3.84916	0.000118522	0.000693122	up in P0
2810429I04Rik	120.539	2.29633	0.538323	4.26507	1.99837e-05	0.00013919	up in P0
Tmod3	611.042	2.30027	0.58943	3.90288	9.50537e-05	0.000570091	up in P0
Gpr137b-ps	86.7128	2.30118	0.59333	3.8697	0.00010897	0.000643395	up in P0
Cep170	1954.7	2.30221	0.444719	5.17575	2.26993e-07	2.27577e-06	up in P0
Tex15	57.1777	2.3037	0.652794	3.52547	0.000422725	0.00215332	up in P0
Fnbp1	504.618	2.30376	0.583114	3.95099	7.78291e-05	0.000476237	up in P0
Trabd	98.5444	2.30433	0.510272	4.51031	6.47339e-06	5.00825e-05	up in P0
Sema6a	586.038	2.30457	0.453801	5.07963	3.78169e-07	3.65292e-06	up in P0
Rab6b	409.315	2.30573	0.2942	7.83457	4.70436e-15	1.23734e-13	up in P0
Pdlim7	1130.35	2.30684	0.356386	6.47341	9.58125e-11	1.57644e-09	up in P0
Ttc7	558.479	2.3072	0.379007	6.08727	1.14853e-09	1.65121e-08	up in P0
Pifo	68.1162	2.3082	0.641842	3.59	0.000330678	0.00173089	up in P0
Rab1b	216.198	2.30978	0.488226	4.7283	2.26411e-06	1.93016e-05	up in P0
Arl5b	403.547	2.31176	0.510033	4.53156	5.85492e-06	4.55356e-05	up in P0
Chrm2	37.5725	2.31186	0.738676	3.10653	0.00189299	0.00800899	up in P0
Prkd2	87.3038	2.31576	0.540712	4.27855	1.88118e-05	0.000131959	up in P0
Zfp444	272.597	2.31672	0.435764	5.31516	1.06565e-07	1.12555e-06	up in P0
Flot1	235.857	2.31752	0.529783	4.37463	1.21637e-05	8.90799e-05	up in P0
Sarm1	219.496	2.31818	0.443849	5.22106	1.77899e-07	1.81054e-06	up in P0
Brsk2	677.496	2.31835	0.42485	5.45696	4.84358e-08	5.38871e-07	up in P0
Tspan33	84.566	2.32076	0.520775	4.44886	8.63271e-06	6.53544e-05	up in P0
Zdhhc8	248.562	2.32128	0.399038	5.81548	6.04607e-09	7.81923e-08	up in P0
2210016L21Rik	91.2077	2.32248	0.559514	4.14566	3.38836e-05	0.000222999	up in P0
Rcbtb2	766.158	2.32452	0.452815	5.13279	2.85479e-07	2.81638e-06	up in P0
Apba1	7124.26	2.3262	0.325748	7.14136	9.24089e-13	1.9465e-11	up in P0
Kcnh5	224.868	2.32686	0.367009	6.33651	2.35031e-10	3.70643e-09	up in P0
Bmp8b	57.5512	2.33004	0.597735	3.89212	9.93724e-05	0.000592871	up in P0
Src	749.013	2.33009	0.320893	7.26058	3.85443e-13	8.43079e-12	up in P0
Myt1l	5762.94	2.33099	0.309335	7.53538	4.86913e-14	1.15363e-12	up in P0
Kcnh6	45.5273	2.33182	0.647795	3.58759	0.000333752	0.00174519	up in P0
Slc24a5	205	2.33213	0.620172	3.75817	0.000171162	0.000962247	up in P0
Phykpl	248.135	2.33238	0.373574	6.24071	4.35592e-10	6.61838e-09	up in P0
H2afy2	349.022	2.33574	0.348874	6.69272	2.19054e-11	3.94137e-10	up in P0
Mb21d2	1397.39	2.33662	0.229168	10.1952	2.08416e-24	1.0867e-22	up in P0
Cdc42bpb	1268.77	2.34172	0.482388	4.8561	1.1972e-06	1.06925e-05	up in P0
2610316D01Rik	238.43	2.34596	0.422205	5.55219	2.82106e-08	3.26361e-07	up in P0
Zfp711	592.562	2.34809	0.327179	7.17573	7.19213e-13	1.53681e-11	up in P0
Ophn1	880.68	2.34917	0.340131	6.90555	5.00108e-12	9.68052e-11	up in P0
Grina	149.3	2.34978	0.502647	4.67108	2.99618e-06	2.49255e-05	up in P0
Ttc9	149.864	2.35257	0.564693	4.1643	3.12311e-05	0.000207572	up in P0
Anks1	811.441	2.3562	0.242547	9.7135	2.64112e-22	1.19968e-20	up in P0
Rgl3	170.898	2.35732	0.574378	4.10574	4.03026e-05	0.000260953	up in P0
Slco3a1	127.279	2.35796	0.554292	4.24752	2.16154e-05	0.000148667	up in P0
4930511M06Rik	125.528	2.35818	0.63657	3.69463	0.000220207	0.00120906	up in P0
Cldn10	98.9048	2.35889	0.534095	4.41425	1.01362e-05	7.54256e-05	up in P0
Kcnt2	447.61	2.35978	0.406007	5.80974	6.25693e-09	8.06376e-08	up in P0
Morn4	129.494	2.36033	0.517081	4.55806	5.16275e-06	4.05785e-05	up in P0
Crmp1	5081.33	2.36113	0.289804	8.14747	3.71615e-16	1.07228e-14	up in P0
Psd	205.675	2.36185	0.423828	5.56935	2.55695e-08	2.99315e-07	up in P0
Idnk	67.8626	2.36329	0.681033	3.46119	0.000537801	0.00266614	up in P0
Ddx39b	1416.05	2.36465	0.444484	5.32158	1.02869e-07	1.09196e-06	up in P0
Ctsa	56.8067	2.36533	0.732107	3.21801	0.00129084	0.00572815	up in P0
Fam207a	289.854	2.36776	0.518989	4.55921	5.13475e-06	4.04229e-05	up in P0
Arhgap10	152.438	2.3681	0.500282	4.72931	2.25283e-06	1.92263e-05	up in P0
Ppp1r9a	2536.58	2.37389	0.629509	3.76943	0.000163624	0.00092691	up in P0
Zfp39	92.1375	2.37396	0.68442	3.46235	0.000535477	0.00265729	up in P0
Map1b	5230.07	2.37489	0.257155	9.23491	2.58507e-20	1.05454e-18	up in P0
2020-09-09	85.8463	2.37572	0.644967	3.6767	0.000236274	0.0012863	up in P0
Pom121	246.415	2.3798	0.552425	4.30657	1.65804e-05	0.000117307	up in P0
Itgb5	212.107	2.3819	0.560935	4.24757	2.16099e-05	0.000148667	up in P0
Atp13a2	359.318	2.38503	0.436326	5.46474	4.63585e-08	5.17315e-07	up in P0
Zfp704	1084.21	2.38642	0.240082	9.93871	2.8246e-23	1.38042e-21	up in P0
Sgsm1	319.33	2.38742	0.332293	7.18094	6.92327e-13	1.4815e-11	up in P0
Rtn2	521.635	2.38904	0.651413	3.67255	0.000240143	0.00130401	up in P0
Pin1	597.664	2.3892	0.363536	6.57191	4.9673e-11	8.45469e-10	up in P0
Wdfy1	1586.89	2.3893	0.342474	6.97693	3.01697e-12	5.96465e-11	up in P0
Agbl5	261.445	2.39289	0.456176	5.24202	1.58832e-07	1.63559e-06	up in P0
Ecm1	71.9652	2.39412	0.593717	4.02574	5.67954e-05	0.000357427	up in P0
Igsf3	422.547	2.39488	0.298517	8.01986	1.05862e-15	2.94111e-14	up in P0
Cabp1	59.9381	2.40177	0.685383	3.50069	0.000464061	0.00234293	up in P0
Tro	330.894	2.41228	0.360504	6.68924	2.24337e-11	4.02177e-10	up in P0
Nrxn1	12248.1	2.41433	0.318856	7.5713	3.69519e-14	8.82554e-13	up in P0
Maged2	85.2754	2.41706	0.567432	4.25103	2.12789e-05	0.000147036	up in P0
Wdr35	98.6877	2.4188	0.55694	4.33276	1.47252e-05	0.000106004	up in P0
Tmem143	362.568	2.42064	0.470132	5.15017	2.60245e-07	2.58465e-06	up in P0
Pde1c	19632.2	2.42315	0.232627	10.4165	2.08471e-25	1.17378e-23	up in P0
Sema4d	260.961	2.42664	0.463828	5.23003	1.69482e-07	1.73321e-06	up in P0
Ssbp3	614.288	2.42742	0.29579	8.20468	2.31204e-16	6.81129e-15	up in P0
Fbn1	2154.6	2.42842	0.343326	7.07382	1.5073e-12	3.09143e-11	up in P0
Dnm1	1899.33	2.42941	0.406975	5.97004	2.37197e-09	3.24323e-08	up in P0
Limk1	441.895	2.42959	0.345151	7.03768	1.95468e-12	3.95421e-11	up in P0
Vegfc	237.555	2.43245	0.64987	3.74168	0.000182794	0.00102337	up in P0
Armc2	255.869	2.43368	0.58177	4.17575	2.9701e-05	0.00019892	up in P0
Fbf1	480.744	2.43722	0.3379	7.21094	5.55677e-13	1.19948e-11	up in P0
Epo	138.398	2.4393	0.571356	4.26825	1.97014e-05	0.000137613	up in P0
Pde11a	186.436	2.44349	0.504969	4.83496	1.33173e-06	1.17803e-05	up in P0
Dixdc1	206.602	2.44374	0.702943	3.48646	0.000489468	0.00245417	up in P0
Xylb	56.9389	2.44442	0.663157	3.68038	0.000232891	0.00127256	up in P0
Ctnnb1	2639.44	2.44832	0.483886	5.0612	4.16616e-07	3.99562e-06	up in P0
Sirt6	59.037	2.45244	0.619533	3.94811	7.8771e-05	0.000481602	up in P0
Rgs6	2311.85	2.45303	0.245463	9.99322	1.63194e-23	8.13664e-22	up in P0
Cadm4	233.645	2.45378	0.360637	6.7999	1.04692e-11	1.94759e-10	up in P0
Arrb1	551.212	2.45558	0.42686	5.75112	8.86536e-09	1.11917e-07	up in P0
Fut10	104.437	2.45561	0.52932	4.63457	3.57687e-06	2.91664e-05	up in P0
Heatr9	34.6028	2.45671	0.739826	3.30332	0.00095548	0.00442425	up in P0
Echdc2	63.3795	2.46096	0.640583	3.8276	0.000129397	0.00074965	up in P0
Dnmt3b	61.4697	2.46143	0.597708	4.1069	4.01013e-05	0.000259764	up in P0
Bahcc1	426.541	2.46795	0.314702	7.83872	4.5516e-15	1.19929e-13	up in P0
H13	652.191	2.46864	0.464389	5.31532	1.06471e-07	1.12536e-06	up in P0
Gpc5	1846.77	2.47422	0.291253	8.49436	1.99031e-17	6.36555e-16	up in P0
Mtg1	35.078	2.47545	0.740658	3.32477	0.000884926	0.00412205	up in P0
Maneal	87.6196	2.47611	0.614984	4.02074	5.80145e-05	0.000363863	up in P0
Rai14	151.642	2.47893	0.607462	4.07717	4.55875e-05	0.000292868	up in P0
Ak8	58.3993	2.47979	0.724596	3.40412	0.000663775	0.003207	up in P0
Yjefn3	25.7211	2.48211	0.80306	3.0766	0.00209377	0.00876422	up in P0
Pacs2	663.129	2.48359	0.339567	7.31253	2.62161e-13	5.8465e-12	up in P0
4931428F04Rik	460.045	2.487	0.653468	3.80625	0.000141089	0.000809782	up in P0
Ppp1r13b	689.111	2.48757	0.427518	5.81892	5.92283e-09	7.66655e-08	up in P0
Mboat7	300.168	2.48776	0.390475	6.36858	1.90788e-10	3.03458e-09	up in P0
Nsmf	88.4227	2.49057	0.519911	4.78237	1.7324e-06	1.50371e-05	up in P0
Chrd	46.4082	2.49192	0.810259	3.03677	0.00239126	0.00981695	up in P0
Slc25a1	59.9976	2.49316	0.774221	3.21888	0.00128691	0.00571298	up in P0
Notch3	139.081	2.49408	0.700171	3.55921	0.000371967	0.00191852	up in P0
Svop	425.068	2.49951	0.396051	6.30893	2.80966e-10	4.3934e-09	up in P0
Sbf2	4241.78	2.50302	0.283512	8.82847	1.06113e-18	3.75616e-17	up in P0
Tmem130	165.786	2.50429	0.437677	5.7168	1.08551e-08	1.35178e-07	up in P0
Tmem150b	26.7315	2.50429	0.795909	3.1271	0.00176539	0.00753803	up in P0
2810410L24Rik	136.971	2.50585	0.440106	5.68744	1.28962e-08	1.58742e-07	up in P0
Tmem35b	165.772	2.5083	0.733187	3.42434	0.000616293	0.00300397	up in P0
Zfp423	4758.52	2.50878	0.311515	8.05376	8.02856e-16	2.26884e-14	up in P0
Ctc1	169.973	2.51194	0.668142	3.76076	0.000169395	0.000953763	up in P0
Fhl2	159.896	2.51206	0.677867	3.71009	0.000207184	0.00114589	up in P0
Sco1	166.823	2.51231	0.447866	5.60451	2.08843e-08	2.49198e-07	up in P0
Tubb3	503.442	2.51251	0.611044	4.11316	3.90287e-05	0.000253259	up in P0
Hid1	226.045	2.5148	0.496248	5.06504	4.0831e-07	3.92726e-06	up in P0
Zfp710	186.966	2.51548	0.506519	4.96196	6.97859e-07	6.47487e-06	up in P0
Ptms	224.11	2.5199	0.533941	4.7192	2.36773e-06	2.0058e-05	up in P0
Cfp	42.7904	2.52527	0.693217	3.62416	0.000289901	0.00154253	up in P0
Spindoc	207.755	2.52811	0.453425	5.57141	2.52686e-08	2.96966e-07	up in P0
Lemd1	93.56	2.52818	0.797852	3.14483	0.00166182	0.00714318	up in P0
Cfap44	337.411	2.5306	0.395478	6.39786	1.57566e-10	2.53338e-09	up in P0
Akt1	100.935	2.53158	0.508918	4.96574	6.84398e-07	6.36194e-06	up in P0
Sergef	910.245	2.53402	0.35798	7.07774	1.46521e-12	3.00927e-11	up in P0
Fxn	98.965	2.53438	0.626078	4.0454	5.22339e-05	0.000331396	up in P0
Dpp9	322.811	2.53479	0.347312	7.29478	2.99143e-13	6.61082e-12	up in P0
Ap1m1	312.229	2.53518	0.612123	4.14135	3.45274e-05	0.000226914	up in P0
Klhdc8b	113.41	2.53562	0.580732	4.36229	1.28707e-05	9.36555e-05	up in P0
Col27a1	108.144	2.53789	0.776194	3.28961	0.00100328	0.00461239	up in P0
Mpp7	475.18	2.54066	0.415004	6.11715	9.52624e-10	1.38707e-08	up in P0
Bend3	333.783	2.54106	0.573221	4.43322	9.28372e-06	6.95715e-05	up in P0
Ptpn3	79.8106	2.5455	0.561217	4.52154	6.13902e-06	4.762e-05	up in P0
Cntnap4	5475.33	2.54641	0.202916	12.5487	4.03977e-36	3.81025e-34	up in P0
Fchsd1	70.8875	2.5494	0.75056	3.38864	0.000702395	0.00337478	up in P0
Pkn1	163.645	2.5508	0.555607	4.58921	4.44918e-06	3.56706e-05	up in P0
Adgra1	59.5096	2.55143	0.699478	3.63605	0.000276847	0.00148159	up in P0
Sc5d	162.398	2.55149	0.605018	4.21277	2.52258e-05	0.000170802	up in P0
Nectin1	1791.99	2.55376	0.351313	7.26941	3.61059e-13	7.92082e-12	up in P0
Slc35f4	1065.15	2.55597	0.321617	7.94667	1.91591e-15	5.1866e-14	up in P0
Sema6d	963.869	2.55617	0.271287	9.42	4.51102e-21	1.91951e-19	up in P0
Mbd6	311.512	2.55843	0.454141	5.63001	1.80197e-08	2.17293e-07	up in P0
Simc1	653.918	2.56084	0.408262	6.27201	3.56428e-10	5.49835e-09	up in P0
Abcg2	164.12	2.56525	0.723235	3.55812	0.000373518	0.00192586	up in P0
Cic	337.756	2.56664	0.455723	5.6284	1.81891e-08	2.19113e-07	up in P0
Nav1	1777.43	2.57634	0.229426	11.2288	2.94368e-29	2.01806e-27	up in P0
Gna11	107.185	2.57898	0.606219	4.24924	2.14499e-05	0.000147942	up in P0
Plscr3	114.466	2.58553	0.589227	4.38441	1.16301e-05	8.55958e-05	up in P0
Parp16	50.738	2.5859	0.833316	3.09352	0.00197794	0.00832321	up in P0
Plod3	192.81	2.58759	0.580323	4.45893	8.23699e-06	6.27112e-05	up in P0
Pde1b	437.534	2.5876	0.466024	5.55252	2.81586e-08	3.26015e-07	up in P0
Fasn	68.0838	2.588	0.684182	3.77497	0.000160026	0.000907572	up in P0
Prn	38.9441	2.58927	0.809671	3.17887	0.00147851	0.00645455	up in P0
Mapk7	55.5172	2.58994	0.67054	3.84786	0.000119156	0.000695768	up in P0
Ddo	67.0667	2.59153	0.6691	3.84952	0.000118348	0.000692686	up in P0
Ccbe1	170.413	2.5921	0.429369	6.02898	1.64997e-09	2.3181e-08	up in P0
Trpc4	2348.3	2.59365	0.258951	10.0152	1.30727e-23	6.53989e-22	up in P0
Syce1l	81.5929	2.59421	0.669077	3.86939	0.000109106	0.000643938	up in P0
Slc39a12	150.033	2.59564	0.429845	6.02677	1.67269e-09	2.34779e-08	up in P0
Traf4	46.7493	2.59736	0.844656	3.06426	0.00218209	0.00909681	up in P0
Sh3bgrl2	72.6579	2.60011	0.609247	4.25837	2.05921e-05	0.000142891	up in P0
Nol4l	850.28	2.60307	0.365334	7.12426	1.04644e-12	2.19176e-11	up in P0
Bmp7	56.1343	2.60342	0.760979	3.41309	0.0006423	0.0031174	up in P0
Ctbp2	162.86	2.61094	0.451652	5.77489	7.70045e-09	9.77105e-08	up in P0
Syngr3	85.5452	2.61331	0.613242	4.25053	2.13268e-05	0.000147161	up in P0
Serpini1	632.536	2.61468	0.324854	8.04651	8.51892e-16	2.38465e-14	up in P0
Zfp334	69.9995	2.61611	0.586076	4.4523	8.49542e-06	6.44052e-05	up in P0
Hsd3b3	132.096	2.61682	0.590792	4.42525	9.63302e-06	7.20433e-05	up in P0
Rasgef1c	165.806	2.61888	0.445493	5.87007	4.35599e-09	5.75924e-08	up in P0
Glb1l2	38.2398	2.62039	0.788669	3.30412	0.000952739	0.00441294	up in P0
Camsap3	657.022	2.62101	0.308471	8.49488	1.98144e-17	6.35605e-16	up in P0
Glra2	71.405	2.6229	0.518721	5.04121	4.62606e-07	4.39684e-06	up in P0
Egfr	66.5167	2.62457	0.812718	3.23207	0.00122897	0.00548979	up in P0
Slc2a12	109.107	2.62476	0.594333	4.40091	1.07798e-05	7.98532e-05	up in P0
Fsd1	153.012	2.63055	0.64338	4.08515	4.40475e-05	0.000283466	up in P0
Rnpepl1	233.613	2.63342	0.537815	4.89559	9.80135e-07	8.87697e-06	up in P0
BC039771	68.0245	2.6343	0.809403	3.24811	0.00116176	0.00522898	up in P0
Slc7a11	57.8285	2.6395	0.806225	3.26244	0.00110456	0.00500805	up in P0
Ptn	294.055	2.64325	0.339242	7.78635	6.89726e-15	1.78245e-13	up in P0
Gm13830	129.381	2.64373	0.578569	4.56393	5.02046e-06	3.96707e-05	up in P0
Ptprs	12154.8	2.64541	0.242118	10.9262	8.63638e-28	5.44202e-26	up in P0
Cdc42ep3	60.3262	2.65193	0.830591	3.16973	0.00152582	0.00663688	up in P0
5730522E02Rik	7294.53	2.65236	0.21974	12.0702	1.51806e-33	1.28454e-31	up in P0
Ccnjl	55.9222	2.65468	0.75677	3.50348	0.000459213	0.00232083	up in P0
Rad9a	60.5502	2.65835	0.870247	3.07638	0.00209529	0.0087672	up in P0
Smyd5	119.482	2.65916	0.615405	4.31371	1.60538e-05	0.000114071	up in P0
Tox2	116.358	2.65993	0.540175	4.91553	8.85439e-07	8.08358e-06	up in P0
Stk32c	93.6114	2.66038	0.706069	3.7571	0.00017189	0.000965612	up in P0
Yipf2	156.024	2.66074	0.868303	3.05337	0.00226287	0.00937042	up in P0
Jak3	39.1924	2.66119	0.867186	3.06218	0.00219734	0.00914251	up in P0
Pdzd7	125.391	2.66211	0.507763	5.23818	1.62171e-07	1.6665e-06	up in P0
Git1	172.552	2.66219	0.610637	4.35552	1.32753e-05	9.64575e-05	up in P0
Ednrb	33.0566	2.66386	0.869879	3.03385	0.00241453	0.0099015	up in P0
Pomgnt2	88.8272	2.66414	0.644435	4.12593	3.69235e-05	0.000240653	up in P0
Zfp804b	784.594	2.66451	0.295848	9.00394	2.17765e-19	8.24722e-18	up in P0
Epn2	312.35	2.66532	0.515878	5.16388	2.41882e-07	2.41674e-06	up in P0
Hspg2	37.8949	2.66534	0.820783	3.2167	0.00129672	0.00574905	up in P0
Csnk1e	151.879	2.66739	0.512935	5.1942	2.05602e-07	2.07961e-06	up in P0
Nlgn3	607.625	2.66823	0.409949	6.50701	7.66637e-11	1.27411e-09	up in P0
Adora1	27.3435	2.67083	0.802117	3.30519	0.000949124	0.00439895	up in P0
Degs2	65.14	2.67229	0.765248	3.48705	0.000488384	0.00245069	up in P0
Clcn5	778.914	2.67252	0.267911	9.97386	1.98371e-23	9.79161e-22	up in P0
Kcnj6	940.448	2.67436	0.263776	10.1365	3.8051e-24	1.96327e-22	up in P0
Lrp5	121.373	2.67971	0.461903	5.7915	6.9761e-09	8.88238e-08	up in P0
Ache	159.227	2.68303	0.632185	4.24882	2.14898e-05	0.000148148	up in P0
Chl1	1526.68	2.68639	0.480496	5.58982	2.27304e-08	2.69921e-07	up in P0
Syne4	42.1019	2.68853	0.818508	3.27044	0.00107381	0.00489108	up in P0
Lef1	72.374	2.6916	0.630764	4.24844	2.15267e-05	0.000148264	up in P0
Mast3	93.9555	2.69199	0.694586	3.87119	0.000108304	0.000639714	up in P0
Samd10	78.8229	2.69344	0.67092	4.00986	6.07557e-05	0.000379928	up in P0
Nrep	192.694	2.6992	0.412548	6.53549	6.34013e-11	1.06808e-09	up in P0
Frmd3	263.003	2.701	0.400939	6.73164	1.67758e-11	3.0518e-10	up in P0
Phf7	50.8677	2.70298	0.786232	3.42547	0.000613738	0.00299349	up in P0
Cacna1d	5049.63	2.70395	0.24615	10.9848	4.52223e-28	2.89893e-26	up in P0
Gcnt2	330.168	2.70475	0.45548	5.93443	2.94868e-09	3.98758e-08	up in P0
Gm38413	59.5523	2.70559	0.616791	4.37236	1.22913e-05	8.98959e-05	up in P0
Ncam2	10936.5	2.70583	0.341349	7.92682	2.2482e-15	6.07506e-14	up in P0
Cables2	138.397	2.70676	0.587351	4.60537	4.11739e-06	3.31902e-05	up in P0
Cep57l1	416.997	2.70765	0.751834	3.59474	0.000324712	0.00170508	up in P0
Slc25a10	35.6309	2.70929	0.786089	3.42774	0.000608639	0.00297548	up in P0
Nyap2	2410.39	2.71278	0.275502	9.84586	7.14226e-23	3.42274e-21	up in P0
Spata1	207.083	2.71588	0.726496	3.72918	0.000192104	0.00106943	up in P0
Adcy7	47.4247	2.71774	0.712358	3.80318	0.000142853	0.000819274	up in P0
Rpl10a	91.7669	2.72421	0.499002	5.4464	5.13997e-08	5.6843e-07	up in P0
Rbfox3	1189.97	2.72519	0.312586	8.71735	2.84801e-18	9.78499e-17	up in P0
Zc3h3	1038.68	2.72646	0.428671	6.35991	2.01867e-10	3.20047e-09	up in P0
Tmem63b	785.187	2.72865	0.262174	10.4052	2.34747e-25	1.31175e-23	up in P0
Cgnl1	97.246	2.7306	0.538467	5.06232	4.14175e-07	3.97479e-06	up in P0
Pcdh10	412.516	2.73413	0.537666	5.0845	3.68599e-07	3.56513e-06	up in P0
Fam171a1	865.007	2.73587	0.318977	8.57524	9.88792e-18	3.23939e-16	up in P0
Atxn2l	1097.19	2.73678	0.25153	10.8785	1.4593e-27	9.07955e-26	up in P0
Adamts15	33.5398	2.73832	0.724866	3.74133	0.000183047	0.0010244	up in P0
Uckl1os	57.67	2.73837	0.736607	3.71506	0.000203153	0.00112701	up in P0
Ptov1	143.661	2.74012	0.492646	5.55641	2.75382e-08	3.19581e-07	up in P0
Slit3	441.268	2.7409	0.398183	6.8807	5.95583e-12	1.14093e-10	up in P0
Gprin1	109.6	2.74172	0.815836	3.37184	0.000746671	0.0035736	up in P0
Gm525	25.4713	2.74546	0.879839	3.10505	0.00190248	0.00804451	up in P0
Cdkl1	387.414	2.74555	0.510617	5.37593	7.61869e-08	8.2469e-07	up in P0
Ctnnbip1	82.275	2.74562	0.676409	4.05203	5.07747e-05	0.00032283	up in P0
Ptgfrn	690.565	2.74911	0.309727	8.87327	7.10308e-19	2.56542e-17	up in P0
Cmtm3	50.1663	2.74949	0.880923	3.11541	0.0018369	0.0078051	up in P0
Slc2a13	480.892	2.75111	0.354265	7.76274	8.31116e-15	2.12927e-13	up in P0
Map1s	86.7663	2.75168	0.723414	3.79168	0.00014963	0.000853182	up in P0
Prrc2b	1045.66	2.7534	0.31008	8.8783	6.78918e-19	2.46407e-17	up in P0
Kcnk2	169.284	2.75611	0.471683	5.83507	5.37677e-09	7.03349e-08	up in P0
Tuba1a	138.322	2.76052	0.507048	5.4346	5.49198e-08	6.04648e-07	up in P0
Prlr	101.969	2.76428	0.740007	3.72242	0.000197324	0.00109601	up in P0
Shmt2	85.344	2.76464	0.603025	4.57395	4.78624e-06	3.80025e-05	up in P0
Nrxn2	2790.27	2.76504	0.276909	9.98476	1.77728e-23	8.802e-22	up in P0
Zp3r	55.4121	2.76622	0.758039	3.62483	0.000289151	0.00153909	up in P0
Cdk8	10331.5	2.76631	0.27493	10.0622	8.11467e-24	4.1011e-22	up in P0
Zfp618	2324.15	2.77026	0.236745	11.7005	1.26695e-31	9.62101e-30	up in P0
Col24a1	128.479	2.77036	0.593362	4.66306	3.11546e-06	2.57643e-05	up in P0
Slc19a1	88.8591	2.77778	0.610158	4.53968	5.63393e-06	4.40174e-05	up in P0
Morn1	197.719	2.7819	0.442465	6.28368	3.3066e-10	5.11642e-09	up in P0
Frrs1	347.178	2.78352	0.879386	3.1686	0.00153177	0.00665761	up in P0
Tex45	20.6928	2.78739	0.906164	3.04029	0.00236351	0.00971652	up in P0
Actl6b	175.696	2.78766	0.469314	5.93254	2.98287e-09	4.03014e-08	up in P0
Pak3	990.643	2.78922	0.341715	8.16129	3.31455e-16	9.5863e-15	up in P0
Asic2	21532	2.79033	0.272329	10.2462	1.23143e-24	6.58306e-23	up in P0
Cdhr3	42.2968	2.79095	0.888785	3.12233	0.00179425	0.00764661	up in P0
Dock6	56.2103	2.79239	0.82937	3.36887	0.00075476	0.00360299	up in P0
Car12	166.556	2.79522	0.594284	4.69926	2.6111e-06	2.18818e-05	up in P0
Gm1653	153.437	2.79523	0.508189	5.49173	3.98024e-08	4.48891e-07	up in P0
Gabra3	455.179	2.79588	0.391731	7.13359	9.77827e-13	2.05385e-11	up in P0
Srcin1	1472.6	2.79708	0.240818	11.6134	3.52496e-31	2.60988e-29	up in P0
Vps25	140.895	2.79777	0.637886	4.3792	1.19113e-05	8.7448e-05	up in P0
Sertad4	125.271	2.80078	0.566896	4.93308	8.09447e-07	7.42645e-06	up in P0
St3gal4	192.332	2.8044	0.451256	6.20788	5.37044e-10	8.06546e-09	up in P0
Gtsf2	60.5226	2.80749	0.779841	3.57342	0.000352355	0.0018314	up in P0
Jpt2	116.385	2.8078	0.669547	4.19245	2.75956e-05	0.000185574	up in P0
Slc1a2	356.432	2.80896	0.434412	6.4609	1.04084e-10	1.70684e-09	up in P0
Zmiz1	576.243	2.80983	0.305162	9.20409	3.44593e-20	1.39039e-18	up in P0
Cers2	135.568	2.81167	0.501028	5.59746	2.17518e-08	2.58924e-07	up in P0
Ccdc180	23.558	2.81174	0.875179	3.17908	0.00147743	0.00645172	up in P0
Pcsk1n	157.884	2.81231	0.468034	6.00055	1.96656e-09	2.72243e-08	up in P0
Pde4b	1124.48	2.81293	0.50641	5.55442	2.7854e-08	3.2274e-07	up in P0
Mcu	1304.96	2.82091	0.396407	7.11535	1.11629e-12	2.32489e-11	up in P0
Fis1	874.444	2.82246	0.323927	8.71041	3.02768e-18	1.03782e-16	up in P0
Smg9	350.245	2.82674	0.404429	6.98489	2.85088e-12	5.65896e-11	up in P0
Rccd1	128.921	2.82788	0.822314	3.43158	0.000600069	0.00293649	up in P0
Sez6	778.937	2.83094	0.332885	8.50184	1.86609e-17	6.00719e-16	up in P0
Men1	64.2403	2.83428	0.62143	4.54391	5.52206e-06	4.32191e-05	up in P0
Iqsec1	826.067	2.83565	0.307869	9.20863	3.30314e-20	1.33642e-18	up in P0
4930444F02Rik	72.2024	2.83602	0.773898	3.66286	0.000249416	0.00134991	up in P0
Fgd4	1550.68	2.83645	0.261814	10.8328	2.40624e-27	1.47238e-25	up in P0
Ptpn23	461.789	2.83787	0.543141	5.22614	1.73085e-07	1.7664e-06	up in P0
1700025G04Rik	794.909	2.84	0.359543	7.89701	2.85664e-15	7.67717e-14	up in P0
Eps8	87.6665	2.84328	0.874431	3.25839	0.00112048	0.00507247	up in P0
Ctnna1	151.535	2.84356	0.746582	3.79406	0.000148202	0.000846673	up in P0
Tcte2	348.515	2.84456	0.366428	7.75717	8.68424e-15	2.21718e-13	up in P0
Ccdc88c	743.842	2.84516	0.363961	7.81493	5.49941e-15	1.42869e-13	up in P0
Abca2	486.365	2.85518	0.341817	8.34881	6.8956e-17	2.11408e-15	up in P0
P2rx6	47.4056	2.85634	0.730013	3.88629	0.000101787	0.000605325	up in P0
Tmem216	180.035	2.8581	0.510013	5.59574	2.19689e-08	2.61297e-07	up in P0
Vash1	127.188	2.85814	0.54114	5.27333	1.33968e-07	1.39541e-06	up in P0
Angpt2	107.619	2.85901	0.650088	4.3894	1.13663e-05	8.3779e-05	up in P0
Mettl21c	55.8924	2.86396	0.931547	3.05997	0.00221358	0.00919718	up in P0
Cntnap1	656.418	2.86444	0.291363	9.82651	8.65647e-23	4.10849e-21	up in P0
Efhc2	83.2529	2.86696	0.729329	3.92163	8.79528e-05	0.000531594	up in P0
Btg3	32.1828	2.87065	0.830527	3.43472	0.000593172	0.00290851	up in P0
4930512B01Rik	136.973	2.87092	1.29134	3.12187	0.00179704	0.00765522	up in P0
Bgn	37.2981	2.87218	0.790162	3.58689	0.000334647	0.00174734	up in P0
Nbeal2	50.5036	2.87441	0.670228	4.26626	1.98776e-05	0.000138582	up in P0
Pabpc1l	59.5631	2.88012	0.921263	3.15277	0.00161727	0.00697395	up in P0
Scrt2	245.24	2.88242	0.42466	6.78097	1.19371e-11	2.19856e-10	up in P0
Kcnh1	399.1	2.88398	0.333721	8.63663	5.7897e-18	1.9353e-16	up in P0
Tmem86b	71.8926	2.88431	0.841573	3.42846	0.000607009	0.00296849	up in P0
Acr	89.388	2.88479	0.816621	3.52883	0.000417396	0.00212837	up in P0
1700061G19Rik	47.8721	2.89501	0.673228	4.27696	1.89461e-05	0.000132775	up in P0
Rabgap1l	1068.35	2.8997	0.272167	10.652	1.70678e-26	1.02324e-24	up in P0
Ctps2	581.279	2.90084	0.330188	8.78192	1.60705e-18	5.65255e-17	up in P0
Pcdh7	6905.97	2.90561	0.476113	6.1043	1.03251e-09	1.49749e-08	up in P0
Pmepa1	142.951	2.90631	0.465786	6.22817	4.7192e-10	7.12354e-09	up in P0
Il18bp	98.1982	2.90947	0.561421	5.16915	2.35164e-07	2.35291e-06	up in P0
B4galt7	183.767	2.91252	0.64914	4.48657	7.23805e-06	5.57074e-05	up in P0
Zfp362	259.519	2.91435	0.446949	6.51467	7.28496e-11	1.21967e-09	up in P0
Cdh8	2180.46	2.91724	0.376546	7.74655	9.44208e-15	2.40238e-13	up in P0
Htr5a	79.6367	2.92479	0.584303	4.98893	6.0714e-07	5.69381e-06	up in P0
Megf6	78.2028	2.92538	0.642204	4.54817	5.4115e-06	4.23987e-05	up in P0
4833418N02Rik	60.4008	2.93054	0.723902	4.03663	5.42242e-05	0.000342702	up in P0
Kcnmb2	518.834	2.93077	0.549504	5.32857	9.89913e-08	1.05382e-06	up in P0
Sh3gl1	298.174	2.93356	0.454133	6.45359	1.09234e-10	1.78733e-09	up in P0
Slc6a1	1356.48	2.93617	0.25748	11.401	4.13299e-30	2.91435e-28	up in P0
Slc13a4	51.8944	2.9381	0.719205	4.04575	5.21565e-05	0.000331047	up in P0
Drp2	722.41	2.9406	0.442966	6.63758	3.18871e-11	5.62794e-10	up in P0
Mex3d	24.5891	2.94605	0.829223	3.50113	0.000463281	0.00233979	up in P0
Antxr1	203.105	2.94797	0.593693	4.958	7.12234e-07	6.59997e-06	up in P0
Ap1s1	134.442	2.94964	0.675977	4.35143	1.35254e-05	9.81307e-05	up in P0
En2	57.0373	2.95095	0.754415	3.89021	0.000100159	0.000596845	up in P0
Rnf220	2060.66	2.95434	0.428963	6.89089	5.54434e-12	1.06486e-10	up in P0
Dscaml1	1059.27	2.95706	0.453289	6.52072	6.99707e-11	1.17342e-09	up in P0
Foxp1	3429.52	2.95738	0.381168	7.75992	8.49813e-15	2.17341e-13	up in P0
Cobll1	138.114	2.96233	0.647408	4.57106	4.85253e-06	3.84669e-05	up in P0
Ptp4a3	84.4308	2.96277	0.663964	4.45571	8.36148e-06	6.35284e-05	up in P0
Creg2	36.5884	2.96514	0.846885	3.48024	0.000500963	0.00250194	up in P0
Serpine2	83.6386	2.96594	0.826996	3.58572	0.000336146	0.00175358	up in P0
Bmper	215.136	2.96599	0.422723	7.00596	2.45299e-12	4.89539e-11	up in P0
Hcn4	141.523	2.96815	0.534154	5.54776	2.89349e-08	3.33698e-07	up in P0
Spata24	36.6394	2.96939	0.875721	3.37849	0.000728855	0.00349511	up in P0
A230077H06Rik	26.2894	2.96941	0.821044	3.57236	0.000353783	0.00183754	up in P0
Fam171a2	126.289	2.97001	0.533057	5.55932	2.70829e-08	3.14544e-07	up in P0
Nos1ap	501.306	2.97129	0.312378	9.50822	1.93958e-21	8.37357e-20	up in P0
Mfsd10	71.8937	2.97192	0.645563	4.58847	4.4651e-06	3.57788e-05	up in P0
Gm1673	18.711	2.97331	0.955554	3.05749	0.00223196	0.00926312	up in P0
Trp53cor1	33.0672	2.97839	0.788051	3.73052	0.000191088	0.00106457	up in P0
Rassf8	62.5139	2.98111	0.637574	4.65484	3.24229e-06	2.67327e-05	up in P0
Arrdc4	77.8395	2.98502	0.770182	3.86204	0.000112444	0.000662322	up in P0
Deup1	53.9676	2.98534	0.681962	4.35604	1.32438e-05	9.63236e-05	up in P0
Wwc1	763.102	2.98669	0.313691	9.51788	1.76747e-21	7.65283e-20	up in P0
Stxbp5	622.769	2.9882	0.512823	5.82764	5.62169e-09	7.31511e-08	up in P0
Ppp1r37	337.04	2.98886	0.470529	6.35329	2.10756e-10	3.33426e-09	up in P0
Podn	27.5137	2.99037	0.91808	3.17216	0.0015131	0.00659001	up in P0
Dmwd	144.71	2.99194	0.477537	6.25544	3.96398e-10	6.07646e-09	up in P0
Dtx3	619.892	2.99756	0.329989	9.08	1.0858e-19	4.25357e-18	up in P0
Nectin3	972.156	2.99799	0.28701	10.443	1.57719e-25	9.01737e-24	up in P0
Phldb1	559.954	3.00277	0.321093	9.34765	8.96171e-21	3.74873e-19	up in P0
Nin	728.781	3.00601	0.274398	10.9508	6.58424e-28	4.16664e-26	up in P0
Htr2a	147.714	3.00618	0.726587	4.13919	3.48536e-05	0.000228671	up in P0
Shb	166.766	3.0076	0.477608	6.28576	3.26258e-10	5.05359e-09	up in P0
Stk32a	97.2362	3.01058	0.631797	4.743	2.10573e-06	1.80345e-05	up in P0
Col26a1	492.918	3.01195	0.340558	8.83972	9.59576e-19	3.44888e-17	up in P0
Slc29a1	58.758	3.01799	0.726036	4.14573	3.38737e-05	0.000222999	up in P0
1500015O10Rik	25.7349	3.01987	0.968787	3.04571	0.00232133	0.00957769	up in P0
Rgs22	115.645	3.02135	0.489816	6.15263	7.62067e-10	1.12286e-08	up in P0
Ttll3	37.6975	3.02289	0.758987	3.95157	7.76388e-05	0.000475269	up in P0
Slc8a2	58.1018	3.02314	0.608165	4.9453	7.60274e-07	7.01879e-06	up in P0
Maats1	21.83	3.03281	0.925622	3.22215	0.00127232	0.00566284	up in P0
Mir138-1	22.9426	3.03284	0.902984	3.29972	0.000967815	0.00447577	up in P0
Celf6	230.665	3.03304	0.553223	5.47422	4.39441e-08	4.92973e-07	up in P0
Adgrb2	427.843	3.0335	0.44001	6.89169	5.51315e-12	1.06024e-10	up in P0
Tfr2	18.3382	3.03593	0.970794	3.07003	0.00214034	0.00894052	up in P0
Nacad	198.853	3.03679	0.499907	6.06559	1.31467e-09	1.8773e-08	up in P0
Rex1bd	41.9888	3.03816	0.853652	3.53385	0.000409546	0.00209267	up in P0
Kcnk13	135.701	3.04012	0.480448	6.314	2.71913e-10	4.26083e-09	up in P0
Slitrk5	384.456	3.04101	0.470503	6.4599	1.04775e-10	1.71627e-09	up in P0
Map7	342.768	3.04157	0.450966	6.74017	1.58198e-11	2.88497e-10	up in P0
Unc119	24.63	3.04292	0.978406	3.10769	0.00188554	0.007982	up in P0
Ap1m2	52.026	3.04344	0.70266	4.30932	1.63758e-05	0.000116137	up in P0
Mogat2	67.1749	3.04381	0.599357	5.05125	4.38923e-07	4.18517e-06	up in P0
Lrp2bp	60.7004	3.04383	0.925081	3.28426	0.00102249	0.00469052	up in P0
Eno4	102.147	3.04473	0.69787	4.34939	1.36514e-05	9.88994e-05	up in P0
Flot2	305.169	3.045	0.397735	7.65138	1.98832e-14	4.89087e-13	up in P0
Ptprn2	4680.16	3.04582	0.221632	13.742	5.68718e-43	7.72621e-41	up in P0
Arnt2	1756.85	3.04765	0.273492	11.1418	7.85461e-29	5.23924e-27	up in P0
Rapgefl1	722.548	3.04983	0.382413	7.97309	1.54751e-15	4.23577e-14	up in P0
Pfkp	5095.62	3.05655	0.266962	11.449	2.37803e-30	1.70115e-28	up in P0
Acvr2b	195.358	3.07065	0.390852	7.84319	4.39242e-15	1.15941e-13	up in P0
Xpr1	3832.12	3.07114	0.289679	10.6012	2.94058e-26	1.74876e-24	up in P0
Camk2g	411.716	3.07223	0.412629	7.44044	1.00349e-13	2.32182e-12	up in P0
Sprn	42.4285	3.07598	0.964346	3.20328	0.00135871	0.00599816	up in P0
Hs3st4	262.182	3.08132	0.42306	7.27344	3.50455e-13	7.69962e-12	up in P0
Ldb2	318.351	3.0837	0.393585	7.82759	4.97309e-15	1.3057e-13	up in P0
Cntn5	19291.7	3.08412	0.228932	13.4717	2.29592e-41	2.83316e-39	up in P0
Pcyt1b	223.057	3.08683	0.435987	7.07196	1.52765e-12	3.1245e-11	up in P0
Pcsk5	170.62	3.08895	0.38546	8.00062	1.23795e-15	3.41371e-14	up in P0
Grb10	220.667	3.08968	0.461544	6.67986	2.39173e-11	4.28256e-10	up in P0
Fgfr2	54.4968	3.0909	0.657026	4.6639	3.1027e-06	2.56818e-05	up in P0
Nfib	150.65	3.09159	0.545569	5.65757	1.53533e-08	1.86967e-07	up in P0
Plat	48.5226	3.09299	0.924547	3.34077	0.000835457	0.00392744	up in P0
Tbc1d31	387.206	3.09831	0.363707	8.51294	1.69575e-17	5.48268e-16	up in P0
4930447N08Rik	360.618	3.10062	1.24765	4.2964	1.73592e-05	0.000122524	up in P0
Myo7a	110.845	3.10295	0.618663	5.00295	5.64598e-07	5.30493e-06	up in P0
Col11a2	70.3606	3.10316	0.610024	5.06068	4.17763e-07	4.00403e-06	up in P0
Vmn2r84	36.4858	3.10988	0.963848	3.15747	0.00159143	0.00687854	up in P0
Dock10	405.285	3.11168	0.56364	5.51566	3.47465e-08	3.95789e-07	up in P0
Cyp2s1	142.154	3.11223	0.592502	5.23869	1.61723e-07	1.66305e-06	up in P0
Epha4	3232.93	3.11408	0.226167	13.7677	3.98795e-43	5.57108e-41	up in P0
Ehmt2	18.7204	3.11454	1.28274	3.04254	0.00234592	0.0096549	up in P0
Nell1os	453.651	3.11576	0.497383	6.26139	3.81569e-10	5.86737e-09	up in P0
Enpp2	561.907	3.116	0.478534	6.50735	7.64893e-11	1.27264e-09	up in P0
Akap17b	48.378	3.11811	0.692391	4.45934	8.22138e-06	6.26699e-05	up in P0
Hras	50.7189	3.12155	0.797029	3.90211	9.53598e-05	0.000571695	up in P0
Zmiz2	298.11	3.12372	0.370003	8.43228	3.39e-17	1.06807e-15	up in P0
Slc16a14	195.555	3.12592	0.521053	5.99002	2.09813e-09	2.89284e-08	up in P0
Eef2k	388.855	3.12664	0.716882	4.36927	1.24665e-05	9.11173e-05	up in P0
Atn1	517.481	3.1299	0.4481	6.98113	2.92815e-12	5.80455e-11	up in P0
Gm10471	23.1144	3.13099	0.949969	3.24918	0.0011574	0.00521095	up in P0
Nek6	164.954	3.13261	0.661424	4.73019	2.24315e-06	1.9156e-05	up in P0
Snta1	67.4504	3.1361	0.716668	4.36305	1.28262e-05	9.34236e-05	up in P0
Ntrk3	14391	3.13687	0.46755	6.7093	1.95567e-11	3.53165e-10	up in P0
Tekt3	947.459	3.1377	0.547001	5.74418	9.23697e-09	1.16409e-07	up in P0
Gnb4	115.847	3.14687	0.726177	4.32998	1.49124e-05	0.000107196	up in P0
Clu	70.7485	3.14841	0.729101	4.28536	1.82441e-05	0.000128341	up in P0
Tnfrsf23	42.5752	3.1486	0.712103	4.37955	1.18927e-05	8.73548e-05	up in P0
Klhl34	81.2861	3.1521	0.738175	4.25962	2.04775e-05	0.000142161	up in P0
Plpp3	48.6736	3.1522	0.721338	4.31734	1.57924e-05	0.000112538	up in P0
Foxo1	91.159	3.15539	0.602563	5.21774	1.81116e-07	1.84201e-06	up in P0
Lypd6	80.2636	3.15713	0.597862	5.25821	1.45464e-07	1.50526e-06	up in P0
Gm16853	26.3857	3.15882	0.869223	3.58136	0.000341806	0.0017797	up in P0
Srebf2	423.878	3.15986	0.596347	5.29951	1.16113e-07	1.2203e-06	up in P0
Atxn7l2	229.283	3.16249	0.479217	6.59004	4.3971e-11	7.58885e-10	up in P0
Npnt	270.818	3.16382	0.410614	7.69613	1.40249e-14	3.50812e-13	up in P0
Frmd6	1077.15	3.16929	0.247862	12.7828	2.04663e-37	2.05572e-35	up in P0
Ccdc24	42.1148	3.16989	1.04914	3.03166	0.00243214	0.00996267	up in P0
Begain	378.257	3.172	0.404895	7.82714	4.99102e-15	1.30809e-13	up in P0
Efemp1	24.1748	3.17313	0.94882	3.28595	0.0010164	0.0046655	up in P0
Gigyf1	56.5566	3.17703	0.821421	3.85013	0.000118053	0.000691509	up in P0
Stmn1	133.447	3.17991	0.531736	5.96464	2.45178e-09	3.34925e-08	up in P0
Tnr	419.23	3.18206	0.309001	10.2894	7.86513e-25	4.25061e-23	up in P0
Pde4a	198.907	3.1829	0.447016	7.10758	1.18096e-12	2.45268e-11	up in P0
Slc16a2	1726.38	3.183	0.284147	11.2	4.07547e-29	2.78108e-27	up in P0
Atp11c	1035.43	3.1834	0.397276	8.01037	1.1436e-15	3.16531e-14	up in P0
Ubtd2	146.878	3.18443	0.463004	6.86101	6.83744e-12	1.29973e-10	up in P0
Tmem98	27.7948	3.18863	0.931542	3.35457	0.000794872	0.00376896	up in P0
Kcnh8	231.318	3.18985	0.357522	8.90791	5.20019e-19	1.92031e-17	up in P0
Gm6878	195.875	3.19387	1.25244	4.09082	4.29856e-05	0.000277114	up in P0
Tes	117.19	3.19394	0.904603	3.49942	0.000466273	0.00235169	up in P0
Plxna3	268.966	3.19405	0.654336	4.8812	1.05442e-06	9.49751e-06	up in P0
Soga1	769.529	3.19415	0.303261	10.5285	6.38122e-26	3.74973e-24	up in P0
Zfp395	69.4097	3.1943	0.58996	5.38593	7.20727e-08	7.83963e-07	up in P0
Gpsm1	275.413	3.19561	0.578312	5.5256	3.28358e-08	3.7605e-07	up in P0
Efcab5	113.906	3.19614	0.793048	4.00967	6.08024e-05	0.00038006	up in P0
2410018L13Rik	538.951	3.19618	0.426749	7.48597	7.10214e-14	1.66143e-12	up in P0
Adcy3	132.381	3.19709	0.536001	5.94953	2.68917e-09	3.66004e-08	up in P0
Btbd11	203.181	3.19792	0.512775	6.2255	4.80009e-10	7.23089e-09	up in P0
Gm12130	46.0734	3.2014	0.724221	4.38008	1.18638e-05	8.72287e-05	up in P0
A330015K06Rik	191.985	3.20365	0.50051	6.38945	1.66483e-10	2.66516e-09	up in P0
Gm3636	85.7101	3.20665	0.863973	3.69612	0.00021892	0.00120288	up in P0
Chrna5	23.8622	3.21019	1.03009	3.09424	0.0019732	0.00831745	up in P0
Trpc7	742.386	3.21141	0.268485	11.956	6.03936e-33	4.91378e-31	up in P0
Trim46	524.462	3.21166	0.49777	6.44873	1.12795e-10	1.84356e-09	up in P0
Zfp579	214.211	3.21342	0.463375	6.92432	4.38087e-12	8.53578e-11	up in P0
Stxbp6	212.874	3.21433	0.363178	8.8355	9.96509e-19	3.55574e-17	up in P0
Rxra	116.746	3.21767	0.67397	4.75428	1.99155e-06	1.70962e-05	up in P0
Mark2	2205.15	3.21847	0.618089	5.2063	1.9264e-07	1.95385e-06	up in P0
Drd2	116.038	3.2219	0.523683	6.13494	8.51938e-10	1.24906e-08	up in P0
Vwc2l	114.988	3.22256	0.778379	4.14384	3.41542e-05	0.00022458	up in P0
Cav1	70.2769	3.22415	0.705457	4.50469	6.64692e-06	5.12377e-05	up in P0
4930553C11Rik	122.186	3.22498	0.466166	6.89716	5.30531e-12	1.02293e-10	up in P0
Aloxe3	77.4803	3.2252	0.547531	5.85907	4.65454e-09	6.14848e-08	up in P0
Tmem151a	71.8041	3.22569	0.738532	4.35182	1.35013e-05	9.80034e-05	up in P0
Fam19a2	4087.53	3.22613	0.32028	10.072	7.34831e-24	3.73931e-22	up in P0
Ebf4	63.7804	3.22724	0.725947	4.42698	9.55623e-06	7.15413e-05	up in P0
Fxyd7	139.594	3.23038	0.693207	4.65733	3.20332e-06	2.64408e-05	up in P0
Plekha5	12360.4	3.23043	0.244216	13.2275	6.08737e-40	7.04232e-38	up in P0
Etv4	49.612	3.23074	0.687312	4.66721	3.05324e-06	2.53575e-05	up in P0
9630028H03Rik	158.513	3.23274	0.616402	5.23722	1.6301e-07	1.6728e-06	up in P0
2020-09-03	1563.88	3.23836	0.34764	9.31363	1.23536e-20	5.12415e-19	up in P0
Zhx2	379.126	3.23959	0.397926	8.13372	4.16298e-16	1.19468e-14	up in P0
Tmem26	100.533	3.24092	0.585757	5.51428	3.50209e-08	3.98608e-07	up in P0
1700023F06Rik	36.0291	3.24103	0.960064	3.34674	0.000817675	0.00385732	up in P0
1700001K19Rik	47.7684	3.24222	0.790361	4.07379	4.62547e-05	0.000296382	up in P0
Smad1	179.647	3.24479	1.23406	3.50401	0.000458306	0.00231783	up in P0
Smad6	29.6557	3.24635	0.943975	3.33724	0.000846147	0.00397391	up in P0
Dlgap2	2449.12	3.24726	0.248905	13.0446	6.8215e-39	7.31977e-37	up in P0
Il3ra	22.7571	3.25083	0.93135	3.42565	0.000613327	0.00299247	up in P0
4930556M19Rik	53.316	3.25252	0.878214	3.68867	0.000225426	0.00123405	up in P0
Wipf3	138.381	3.25372	0.57062	5.68705	1.29252e-08	1.58967e-07	up in P0
Tmprss6	45.7926	3.25477	1.04254	3.11029	0.00186907	0.00792134	up in P0
Gpr165	17.2264	3.25493	0.977663	3.25007	0.00115378	0.0051994	up in P0
Slc41a2	586.371	3.2586	0.291994	11.1522	6.98916e-29	4.72582e-27	up in P0
Nr2c2	260.583	3.26802	0.669119	4.89048	1.00591e-06	9.0826e-06	up in P0
Hectd2	170.59	3.27273	0.445132	7.33481	2.22042e-13	4.99695e-12	up in P0
Npr3	39.6969	3.27318	0.776739	4.17262	3.0111e-05	0.000201302	up in P0
Csmd2	2439.13	3.27715	0.320317	10.2301	1.45421e-24	7.71826e-23	up in P0
Samd11	47.8575	3.28643	1.02576	3.25371	0.00113908	0.00514724	up in P0
Chrna3	26.4338	3.2867	1.00719	3.22203	0.00127288	0.00566284	up in P0
Tshz2	2426.98	3.29006	0.256328	12.8335	1.06433e-37	1.07949e-35	up in P0
Acsl5	54.1477	3.29059	0.767518	4.26005	2.04381e-05	0.000141955	up in P0
Pnck	133.896	3.29932	0.533847	6.16451	7.07022e-10	1.04487e-08	up in P0
Mmp14	22.5239	3.29973	0.879645	3.67721	0.000235798	0.00128466	up in P0
Scn3b	253.807	3.30477	0.528653	6.24068	4.35685e-10	6.61838e-09	up in P0
Il17d	120.703	3.31088	0.494924	6.66738	2.60409e-11	4.64595e-10	up in P0
Stac3	54.3423	3.31311	0.782696	4.19224	2.76211e-05	0.000185662	up in P0
Csf1	29.6431	3.31478	1.04601	3.16603	0.00154535	0.00670087	up in P0
Car10	2526.05	3.31574	0.276282	11.9998	3.5624e-33	2.94704e-31	up in P0
Asphd2	26.6829	3.31823	0.91932	3.52434	0.000424547	0.00215963	up in P0
Dennd2a	272.908	3.3206	0.479342	6.92275	4.42969e-12	8.61957e-11	up in P0
Gatm	45.7578	3.32377	0.722497	4.55044	5.3535e-06	4.19886e-05	up in P0
Myo5b	322.933	3.32455	0.434699	7.64119	2.15228e-14	5.25922e-13	up in P0
Ang	39.3881	3.32571	1.03025	3.26456	0.00109634	0.00497689	up in P0
Pid1	3802.59	3.32678	0.238952	13.921	4.72019e-44	6.92046e-42	up in P0
Gm16982	16.3705	3.32896	1.28188	3.07778	0.00208551	0.00873613	up in P0
Mog	94.4186	3.33316	0.802197	4.13538	3.54365e-05	0.000231982	up in P0
Lmo4	46.955	3.33706	0.788394	4.19268	2.75679e-05	0.000185473	up in P0
Agpat4	309.644	3.34263	0.40687	8.2046	2.31367e-16	6.81129e-15	up in P0
Tmem132c	8537.75	3.34386	0.202414	16.5193	2.66399e-61	8.76629e-59	up in P0
Gmnc	225.839	3.34527	0.437771	7.62033	2.53018e-14	6.12205e-13	up in P0
2610027K06Rik	54.613	3.34995	0.776511	4.28163	1.85531e-05	0.000130267	up in P0
Slc22a21	170.51	3.35298	0.597544	5.5817	2.38183e-08	2.81486e-07	up in P0
Nrp1	131.33	3.35548	0.885627	3.80874	0.000139678	0.000802308	up in P0
Lrriq1	392.549	3.35613	0.301394	11.1243	9.55592e-29	6.34548e-27	up in P0
Cdkn1c	15.6642	3.35717	1.28676	3.04854	0.00229955	0.00950104	up in P0
Gpm6b	639.415	3.3577	0.331971	10.1051	5.24636e-24	2.68817e-22	up in P0
Cnih2	549.713	3.36605	0.28684	11.7243	9.56807e-32	7.34114e-30	up in P0
Ntn1	76.9923	3.36695	0.699241	4.78867	1.67888e-06	1.46154e-05	up in P0
Masp1	329.206	3.36748	0.497638	6.76307	1.35099e-11	2.479e-10	up in P0
Arhgap18	338.204	3.36803	0.544685	6.17719	6.52515e-10	9.72077e-09	up in P0
Gucy1a1	124.394	3.36821	0.805772	4.16584	3.10202e-05	0.000206448	up in P0
Pitpnc1	275.812	3.36884	0.433941	7.74867	9.2858e-15	2.36668e-13	up in P0
Miga1	206.482	3.37023	1.24603	3.83681	0.00012464	0.000723794	up in P0
Ckmt2	175.504	3.37058	0.721728	4.66527	3.08205e-06	2.55395e-05	up in P0
Lingo1	17.6579	3.37413	0.96526	3.40737	0.000655924	0.00317519	up in P0
Rtn4r	119.021	3.37689	0.581733	5.78679	7.17458e-09	9.11941e-08	up in P0
Greb1l	657.381	3.37781	0.409711	8.24015	1.71993e-16	5.12449e-15	up in P0
Scube3	65.3829	3.37901	1.07692	3.22198	0.00127307	0.00566284	up in P0
Epha5	1824.11	3.37943	0.46283	7.30271	2.82023e-13	6.24245e-12	up in P0
Cd200	169.205	3.38333	0.494749	6.82852	8.57923e-12	1.6122e-10	up in P0
Trim36	112.15	3.38505	0.573313	5.88226	4.0471e-09	5.37003e-08	up in P0
Jph3	146.438	3.38566	0.593161	5.69627	1.22456e-08	1.51237e-07	up in P0
Islr	11.6523	3.38761	1.194	3.05533	0.00224814	0.00931716	up in P0
Zc3h7a	18227.4	3.38809	0.224426	15.0967	1.70174e-51	3.70579e-49	up in P0
Vstm2a	587.136	3.39264	0.363832	9.31907	1.17368e-20	4.88199e-19	up in P0
Zdhhc2	65.9569	3.39342	0.814785	4.13719	3.51582e-05	0.000230338	up in P0
Rab34	30.8937	3.40437	0.973676	3.45139	0.000557705	0.00275559	up in P0
Lmx1a	282.14	3.40567	0.408545	8.3236	8.53289e-17	2.5999e-15	up in P0
Tead1	212.462	3.40579	0.568092	5.98468	2.16817e-09	2.98386e-08	up in P0
Gas2l2	21.0385	3.40745	1.02862	3.23622	0.00121122	0.00541865	up in P0
Klhl5	138.897	3.40756	0.457599	7.43068	1.08044e-13	2.49207e-12	up in P0
Tnip2	96.3843	3.40766	0.585567	5.79439	6.85719e-09	8.76375e-08	up in P0
Glis3	306.274	3.40771	0.589788	5.76078	8.37259e-09	1.05877e-07	up in P0
Gm10220	23.0202	3.40945	0.94443	3.52461	0.000424109	0.00215815	up in P0
Adamts16	256.763	3.41034	0.5742	5.92207	3.17908e-09	4.26798e-08	up in P0
Ebf3	5764.89	3.41079	0.247314	13.7904	2.90995e-43	4.10386e-41	up in P0
Tmem53	70.9922	3.41311	0.908195	3.73817	0.000185368	0.00103543	up in P0
Sipa1	33.9785	3.41343	0.863611	3.90525	9.4127e-05	0.00056522	up in P0
Tenm1	591.404	3.41986	0.292327	11.6907	1.42201e-31	1.06349e-29	up in P0
Vmn2r19	50.0691	3.42107	1.05926	3.18084	0.00146849	0.00641511	up in P0
Isoc1	27.2594	3.42341	1.05422	3.20314	0.00135939	0.00599816	up in P0
Npepl1	26.9994	3.42489	0.858572	3.90388	9.46616e-05	0.000567969	up in P0
Slco1a4	77.3692	3.42556	0.581454	5.85224	4.84984e-09	6.38937e-08	up in P0
Spred3	70.3552	3.42603	0.596836	5.70328	1.17526e-08	1.45512e-07	up in P0
Chic1	178.828	3.4286	0.475545	7.19296	6.33993e-13	1.36258e-11	up in P0
Cd68	30.1244	3.43149	1.03459	3.28024	0.0010372	0.00474187	up in P0
Fam20a	98.2603	3.43259	0.703228	4.85478	1.20521e-06	1.07446e-05	up in P0
Synpr	444.41	3.43526	0.447248	7.67745	1.62288e-14	4.02539e-13	up in P0
Pof1b	32.3637	3.43844	0.966864	3.49476	0.000474489	0.00238988	up in P0
Fam81a	169.919	3.43941	0.518444	6.6152	3.71044e-11	6.48693e-10	up in P0
Epha10	2161.7	3.44064	0.40433	8.51091	1.72573e-17	5.56744e-16	up in P0
Slc8a3	1272.85	3.44523	0.315965	10.9001	1.15173e-27	7.19614e-26	up in P0
Rgs20	361.948	3.4464	0.458637	7.50672	6.06267e-14	1.42728e-12	up in P0
Agrn	305.363	3.44735	0.537896	6.39297	1.62697e-10	2.60738e-09	up in P0
Kctd17	683.568	3.44956	0.361	9.54662	1.34002e-21	5.83619e-20	up in P0
Flna	517.039	3.45005	0.310672	11.0952	1.32431e-28	8.71575e-27	up in P0
Pgpep1	23.2707	3.45077	1.02016	3.29852	0.000971965	0.00448795	up in P0
Zfp185	39.4307	3.45201	0.734748	4.62565	3.73418e-06	3.03323e-05	up in P0
Usp43	26.344	3.4533	0.923085	3.6699	0.000242642	0.00131613	up in P0
C030034L19Rik	41.2691	3.45971	0.943308	3.59372	0.000325984	0.00171017	up in P0
Glis1	114.727	3.46482	0.519279	6.64786	2.97376e-11	5.2611e-10	up in P0
Colgalt1	250.338	3.46522	0.634858	5.4541	4.92202e-08	5.46776e-07	up in P0
Bach2	297.606	3.46908	0.354546	9.77023	1.51109e-22	6.99259e-21	up in P0
Ccdc120	140.255	3.4731	0.779313	4.43457	9.22555e-06	6.92759e-05	up in P0
Cntn2	226.525	3.48028	0.525129	6.61561	3.70027e-11	6.47678e-10	up in P0
Gm40893	27.3771	3.48073	1.27843	3.36946	0.00075315	0.00359763	up in P0
Macrod1	125.191	3.48151	0.450832	7.69295	1.43775e-14	3.58422e-13	up in P0
Adamtsl1	954.241	3.48395	0.379377	9.17993	4.31362e-20	1.73106e-18	up in P0
Grip1os2	1088.09	3.48457	0.547518	6.3658	1.94281e-10	3.08681e-09	up in P0
Chrna7	367.28	3.48519	0.408057	8.52816	1.48695e-17	4.81809e-16	up in P0
Sulf2	267.026	3.48677	0.454541	7.65925	1.87025e-14	4.62349e-13	up in P0
Fam189a2	72.2662	3.48684	0.637953	5.43093	5.60597e-08	6.1674e-07	up in P0
Nckap5	2255.62	3.48753	0.269473	12.9396	2.69198e-38	2.78761e-36	up in P0
Prr7	29.6491	3.48828	0.950464	3.6042	0.000313119	0.001653	up in P0
Slc24a4	86.5262	3.49352	0.612663	5.66981	1.4296e-08	1.74954e-07	up in P0
Cacng5	199.502	3.49515	0.504997	6.89721	5.30326e-12	1.02293e-10	up in P0
Neurl1a	533.086	3.49554	0.529893	6.59685	4.19985e-11	7.26536e-10	up in P0
Vmn2r96	54.9076	3.50284	0.826157	4.08983	4.3169e-05	0.000278175	up in P0
Trim62	449.874	3.50406	0.466556	7.50303	6.236e-14	1.46576e-12	up in P0
Tulp2	96.8975	3.50842	0.922681	3.81096	0.000138429	0.000796061	up in P0
Lck	48.2049	3.50944	0.894615	3.9302	8.48758e-05	0.000516156	up in P0
Epb41	311.214	3.50984	1.16777	3.13505	0.00171823	0.00735999	up in P0
Tert	270.059	3.51414	0.654883	5.3655	8.07268e-08	8.71285e-07	up in P0
Jag2	243.784	3.51601	0.524375	6.69148	2.20931e-11	3.97031e-10	up in P0
Tubb5	96.1078	3.51731	0.76742	4.5716	4.84022e-06	3.83899e-05	up in P0
Thtpa	167.464	3.52171	0.574923	6.10818	1.00774e-09	1.46443e-08	up in P0
Gm2061	15.6522	3.52705	1.07617	3.16145	0.00156986	0.00679919	up in P0
Mal2	35.9507	3.52969	0.989215	3.52486	0.000423714	0.00215762	up in P0
Cpne9	387.462	3.53046	0.505322	6.98045	2.94229e-12	5.82478e-11	up in P0
Pxylp1	190.259	3.53587	0.49286	7.15585	8.31542e-13	1.76664e-11	up in P0
D17H6S56E-5	11.1071	3.53674	1.26987	3.04341	0.00233917	0.00963249	up in P0
Hpca	869.017	3.5563	0.368408	9.64539	5.14166e-22	2.30023e-20	up in P0
Ttyh3	542.026	3.55713	0.511633	6.94965	3.66187e-12	7.18211e-11	up in P0
Stx17	59.2699	3.56053	1.13027	3.28131	0.00103325	0.00472673	up in P0
4933409K07Rik	2569.89	3.56301	0.313248	11.3735	5.66826e-30	3.95923e-28	up in P0
Notch2	202.526	3.56414	0.52093	6.82234	8.95692e-12	1.67891e-10	up in P0
2020-03-01	1369.53	3.56504	0.328571	10.8459	2.08514e-27	1.2812e-25	up in P0
Smpd3	185.014	3.57091	0.67938	5.24061	1.60045e-07	1.64694e-06	up in P0
Fpgs	208.239	3.57205	0.672038	5.30979	1.09749e-07	1.1567e-06	up in P0
Cadm1	4668.15	3.57435	0.275677	12.965	1.93107e-38	2.04252e-36	up in P0
Rhof	54.2369	3.57612	0.814686	4.33973	1.42661e-05	0.000102899	up in P0
2610307P16Rik	1393.76	3.57882	0.347529	10.2945	7.46247e-25	4.04777e-23	up in P0
Mrpl54	27.2654	3.5811	0.995431	3.47143	0.000517701	0.00257511	up in P0
Rsph3b	494.982	3.58546	0.458604	7.81539	5.47927e-15	1.42596e-13	up in P0
Fcho1	198.885	3.59325	0.408639	8.76425	1.88022e-18	6.5821e-17	up in P0
Cgref1	43.9741	3.59666	0.92281	3.8755	0.000106407	0.000629767	up in P0
Dock4	610.472	3.60663	0.595759	6.04582	1.48655e-09	2.09846e-08	up in P0
Phf24	999.701	3.60732	0.293927	12.2668	1.36531e-34	1.21793e-32	up in P0
Sncaip	567.897	3.60813	0.453576	7.94996	1.86567e-15	5.06913e-14	up in P0
LOC100861615	192.775	3.6093	0.437426	8.24303	1.679e-16	5.01262e-15	up in P0
Ecel1	10.9302	3.61344	1.19815	3.18924	0.0014265	0.00625328	up in P0
Scarf2	66.9246	3.61497	0.88419	4.04768	5.17284e-05	0.000328612	up in P0
Myh7b	38.8409	3.61575	0.931122	3.82621	0.00013013	0.000752723	up in P0
Mdfic	183.595	3.61637	0.69232	5.20767	1.91224e-07	1.94082e-06	up in P0
Sox11	145.509	3.61993	0.67117	5.37125	7.81911e-08	8.45767e-07	up in P0
Prkab1	23.8054	3.62113	0.950233	3.71003	0.000207232	0.00114589	up in P0
Ccdc18	15.9691	3.62185	1.21638	3.26464	0.00109604	0.00497689	up in P0
Dusp8	191.208	3.62486	0.462146	7.80843	5.79058e-15	1.49907e-13	up in P0
Rnasel	90.6561	3.62688	0.732056	4.92163	8.58246e-07	7.84985e-06	up in P0
Scn3a	729.813	3.63254	0.543308	6.67905	2.40489e-11	4.30092e-10	up in P0
Tnk1	10.3385	3.63379	1.267	3.06429	0.00218186	0.00909681	up in P0
Atp1b2	394.868	3.6354	0.415324	8.74179	2.29451e-18	7.99463e-17	up in P0
Ly6e	99.0894	3.63632	0.751454	4.82057	1.43148e-06	1.25725e-05	up in P0
Sycp2	12.4809	3.63715	1.17194	3.26103	0.0011101	0.00503163	up in P0
Necab1	349.518	3.63956	0.364715	9.96436	2.18273e-23	1.07026e-21	up in P0
Frem1	167.067	3.63991	0.647943	5.60134	2.12696e-08	2.53387e-07	up in P0
Gm19710	121.281	3.6428	0.583275	6.21642	5.08641e-10	7.64666e-09	up in P0
Htr4	211.936	3.64546	0.391327	9.29343	1.49389e-20	6.16199e-19	up in P0
Cacnb1	238.183	3.64694	0.630387	5.78522	7.2419e-09	9.19709e-08	up in P0
Rpph1	68.9688	3.64957	0.884011	3.9549	7.65682e-05	0.000469297	up in P0
Cntfr	135.617	3.65146	0.562694	6.46401	1.01963e-10	1.67391e-09	up in P0
Ggta1	18.11	3.65601	1.06586	3.29172	0.00099576	0.00458353	up in P0
Trpv4	54.4949	3.65756	0.857118	4.23705	2.2648e-05	0.000155465	up in P0
Prrg3	79.5906	3.65845	0.592851	6.09649	1.08422e-09	1.56483e-08	up in P0
Igf2bp2	616.998	3.65937	0.368975	9.90768	3.85485e-23	1.87772e-21	up in P0
Rgs12	52.2206	3.66194	0.993486	3.65376	0.000258425	0.00139205	up in P0
Ankrd13b	250.956	3.66302	0.506179	7.22035	5.18524e-13	1.12256e-11	up in P0
Stum	17.866	3.6646	0.947277	3.71499	0.000203209	0.00112701	up in P0
Rmrp	158.16	3.66713	0.720606	4.98155	6.30774e-07	5.89306e-06	up in P0
Fam102b	252.87	3.67124	0.423262	8.6551	4.92465e-18	1.66114e-16	up in P0
Mest	84.3428	3.67251	0.878439	4.13758	3.50992e-05	0.000230079	up in P0
Cacna2d1	809.654	3.67429	0.319701	11.4851	1.56764e-30	1.12688e-28	up in P0
1110015O18Rik	16.6193	3.67506	0.98448	3.54249	0.000396363	0.00202951	up in P0
Slc6a20a	168.015	3.67591	0.484464	7.56024	4.02338e-14	9.57848e-13	up in P0
Vat1	26.8786	3.67678	1.00023	3.61228	0.00030352	0.00160863	up in P0
Fbxo16	188.274	3.67768	0.741953	4.94212	7.72788e-07	7.12543e-06	up in P0
Slc29a4	318.983	3.67993	0.613328	5.99338	2.05522e-09	2.83632e-08	up in P0
Rgs11	103.548	3.68004	0.869238	4.21278	2.52245e-05	0.000170802	up in P0
Vav2	104.694	3.68107	0.668521	5.47804	4.30057e-08	4.83544e-07	up in P0
Jup	76.2501	3.68433	0.619458	5.89855	3.66703e-09	4.89201e-08	up in P0
Nsun7	161.324	3.68779	0.49886	7.36785	1.73396e-13	3.92008e-12	up in P0
Prrt2	183.781	3.69174	0.546816	6.72316	1.77823e-11	3.22302e-10	up in P0
Cnpy1	199.539	3.69949	0.514581	7.16633	7.70328e-13	1.6413e-11	up in P0
Elavl2	28.9643	3.70128	1.02704	3.51443	0.000440699	0.00223566	up in P0
Zfp36l1	22.2544	3.70208	1.09233	3.23698	0.00120803	0.005406	up in P0
Slc1a4	110.992	3.70386	0.603461	6.10413	1.03364e-09	1.49767e-08	up in P0
Cnn3	22.2893	3.70409	0.906644	3.9604	7.48243e-05	0.000460306	up in P0
Lama5	24.1132	3.70433	1.13694	3.19449	0.00140078	0.00614781	up in P0
Tmem176b	12.0097	3.70637	1.1826	3.28659	0.00101408	0.00465771	up in P0
Adgrg2	83.9095	3.7113	0.667001	5.51654	3.45737e-08	3.94124e-07	up in P0
Mrgpre	35.4221	3.71245	0.805959	4.51988	6.18734e-06	4.79697e-05	up in P0
Gnaz	282.319	3.71348	0.812734	4.58621	4.51359e-06	3.61087e-05	up in P0
Epha8	504.15	3.71505	0.34932	10.6109	2.65212e-26	1.58357e-24	up in P0
Prss53	50.8006	3.7152	0.92385	3.97562	7.01975e-05	0.000434023	up in P0
Rnf217	162.668	3.71536	0.484652	7.63889	2.19095e-14	5.34491e-13	up in P0
Lrp3	225.08	3.71562	0.466265	7.9538	1.8088e-15	4.92365e-14	up in P0
Cald1	166.458	3.71589	0.51184	7.24626	4.28453e-13	9.31649e-12	up in P0
Tktl1	90.5582	3.71654	0.606641	6.08498	1.16504e-09	1.67169e-08	up in P0
Zfp558	80.5664	3.72192	0.71469	5.17123	2.32562e-07	2.32845e-06	up in P0
Hsd3b7	103.752	3.7312	0.644963	5.76143	8.34038e-09	1.0565e-07	up in P0
Myo19	161.766	3.73182	0.660584	5.61435	1.973e-08	2.36376e-07	up in P0
Otud3	329.919	3.73697	0.885387	4.16853	3.06564e-05	0.000204579	up in P0
Panx2	52.6982	3.73993	0.761848	4.84298	1.27909e-06	1.13553e-05	up in P0
Grm5	2144.39	3.74463	0.336672	11.1207	9.94443e-29	6.57398e-27	up in P0
Fa2h	102.414	3.75364	0.622058	6.00049	1.96718e-09	2.72243e-08	up in P0
Gm4876	121.196	3.75444	0.474682	7.86866	3.58468e-15	9.54711e-14	up in P0
Tnfaip8	123.568	3.75515	1.06097	3.65579	0.000256394	0.00138363	up in P0
Syt6	49.6117	3.7556	0.68851	5.38685	7.17024e-08	7.80713e-07	up in P0
Foxm1	15.7479	3.76153	1.22787	3.34161	0.000832931	0.00391681	up in P0
Rgs9	185.237	3.76592	0.771449	4.87943	1.06394e-06	9.57159e-06	up in P0
Thra	913.594	3.76932	0.344835	10.9235	8.89665e-28	5.58227e-26	up in P0
Sgsm2	288.414	3.77137	0.389946	9.65062	4.88584e-22	2.19241e-20	up in P0
Tacr1	133.307	3.77196	0.765123	4.91422	8.91344e-07	8.11748e-06	up in P0
Pcgf2	340.308	3.77435	0.573696	6.56874	5.07427e-11	8.62684e-10	up in P0
Adamts10	447.314	3.77509	0.504088	7.48624	7.08773e-14	1.66068e-12	up in P0
Crabp2	35.5054	3.77886	1.03596	3.44056	0.000580505	0.00285491	up in P0
Jpt1	103.504	3.7846	0.514684	7.30886	2.69421e-13	5.99938e-12	up in P0
Acss1	97.5247	3.78464	0.783761	4.809	1.51691e-06	1.32678e-05	up in P0
Trip10	14.7093	3.78534	1.07189	3.28323	0.00102625	0.00470342	up in P0
Fxyd5	54.8473	3.786	0.65786	5.66211	1.49526e-08	1.82538e-07	up in P0
Mgat4c	807.922	3.78875	0.706495	5.36111	8.27103e-08	8.89451e-07	up in P0
Isyna1	78.8478	3.78952	0.583876	6.41239	1.43255e-10	2.31081e-09	up in P0
Otx2os1	336.248	3.79566	0.437671	8.65515	4.9225e-18	1.66114e-16	up in P0
Fbxl7	2140.44	3.79968	0.392002	9.69194	3.26264e-22	1.46848e-20	up in P0
Tmem44	359.906	3.80757	1.23265	3.34735	0.000815893	0.00385137	up in P0
Necab2	340.254	3.8127	0.393825	9.64407	5.20829e-22	2.32302e-20	up in P0
Nctc1	35.0551	3.81409	0.916787	4.0654	4.79492e-05	0.000306444	up in P0
Nln	797.768	3.81666	0.370974	10.2825	8.44859e-25	4.54934e-23	up in P0
Ccdc114	32.1572	3.8179	0.823508	4.52618	6.00593e-06	4.66365e-05	up in P0
Lmo1	21.6901	3.82541	1.06268	3.48184	0.000497989	0.00248877	up in P0
Lrrc75a	56.7245	3.82563	0.782265	4.81457	1.47516e-06	1.29485e-05	up in P0
Atl3	195.354	3.82857	0.655545	5.82847	5.59373e-09	7.28513e-08	up in P0
Scai	144.789	3.82936	0.912827	4.21932	2.45044e-05	0.000166603	up in P0
Vstm2l	883.805	3.83715	0.302578	12.6721	8.44707e-37	8.12235e-35	up in P0
Chd5	598.29	3.84571	0.328498	11.6988	1.29258e-31	9.71601e-30	up in P0
Fzd3	196.167	3.8486	0.613849	6.25063	4.08804e-10	6.24723e-09	up in P0
Sh2d3c	95.4065	3.85118	0.56989	6.71079	1.93579e-11	3.50002e-10	up in P0
Homer2	480.039	3.85139	0.504354	7.63126	2.32477e-14	5.65273e-13	up in P0
Tmem132d	29806.6	3.85446	0.247101	15.5986	7.44057e-55	1.80623e-52	up in P0
Ptprg	2265.32	3.85524	0.271126	14.2161	7.27918e-46	1.13463e-43	up in P0
Zfhx2os	20.4929	3.85555	1.26829	3.40411	0.000663793	0.003207	up in P0
Fam131c	40.78	3.85605	1.08344	3.48915	0.000484556	0.00243378	up in P0
Aplp1	535.577	3.85617	0.380702	10.1182	4.58604e-24	2.35799e-22	up in P0
Rcn2	66.4654	3.86158	0.829104	4.618	3.87461e-06	3.13012e-05	up in P0
Cand2	87.7419	3.87718	0.714105	5.38982	7.05299e-08	7.68511e-07	up in P0
9130221H12Rik	24.1386	3.88839	1.15058	3.55584	0.000376771	0.00194195	up in P0
Rin2	211.737	3.89282	0.439971	8.81763	1.16905e-18	4.12172e-17	up in P0
Emid1	158.719	3.89619	0.54769	7.08557	1.38472e-12	2.8479e-11	up in P0
Scarb1	39.007	3.89692	1.05518	3.62525	0.000288684	0.00153716	up in P0
Mdga1	39.198	3.89719	0.747787	5.14593	2.66204e-07	2.63852e-06	up in P0
Gm15638	39.384	3.90122	1.01301	3.81	0.000138964	0.000798827	up in P0
Cep250	167.863	3.90231	0.48611	8.00931	1.15355e-15	3.18691e-14	up in P0
Igfbp7	298.709	3.90323	0.535896	7.26572	3.71063e-13	8.12826e-12	up in P0
Msi1	73.9266	3.90414	0.741291	5.20591	1.93044e-07	1.9566e-06	up in P0
Ankrd34a	25.6682	3.90812	0.896692	4.20018	2.66706e-05	0.000179763	up in P0
Dcaf15	106.153	3.90883	0.564083	6.87341	6.2684e-12	1.19771e-10	up in P0
Syn3	5686.39	3.90994	0.326264	11.983	4.364e-33	3.57028e-31	up in P0
Col1a1	19.5314	3.91206	1.02752	3.63927	0.00027341	0.0014669	up in P0
Dok4	22.2867	3.91337	1.13523	3.15198	0.00162169	0.00699099	up in P0
Hs3st2	461.646	3.91683	0.471706	8.29263	1.10771e-16	3.34074e-15	up in P0
Zglp1	62.3808	3.91702	0.94473	4.11387	3.89078e-05	0.000252585	up in P0
Pald1	55.3644	3.9193	0.758221	5.11386	3.15637e-07	3.08715e-06	up in P0
C230072F16Rik	86.4455	3.92215	0.58425	6.6551	2.83103e-11	5.02059e-10	up in P0
Thap7	53.2455	3.92396	1.01024	3.86918	0.000109201	0.00064424	up in P0
Gpr68	84.027	3.92578	0.797315	4.8815	1.05284e-06	9.48902e-06	up in P0
Sh2b2	71.8041	3.92768	0.638953	6.0621	1.34353e-09	1.91482e-08	up in P0
Adgrl3	9802.87	3.93429	0.272508	14.4368	3.034e-47	4.99194e-45	up in P0
Tst	17.5922	3.94089	1.27627	3.32097	0.000897056	0.00417592	up in P0
Apc2	223.754	3.94672	0.375828	10.4781	1.08859e-25	6.24799e-24	up in P0
Cavin4	20.5728	3.96235	1.10338	3.40881	0.000652481	0.00316059	up in P0
Col6a1	17.1675	3.96332	1.05586	3.34263	0.000829872	0.00390615	up in P0
Slc4a5	326.5	3.9636	0.524677	7.54126	4.65442e-14	1.10453e-12	up in P0
Rgs4	85.7101	3.96449	0.768028	5.11529	3.13256e-07	3.06792e-06	up in P0
Slc38a4	181.059	3.96579	0.482026	8.18507	2.72157e-16	7.96461e-15	up in P0
Slc12a7	22.6757	3.96645	1.12552	3.37902	0.00072744	0.00348945	up in P0
Slco5a1	125.841	3.9713	0.830883	4.56519	4.99038e-06	3.94752e-05	up in P0
Thbs3	96.0084	3.97276	0.788884	5.00018	5.72781e-07	5.3784e-06	up in P0
Zyx	20.677	3.97299	0.943229	4.02038	5.8105e-05	0.000364122	up in P0
Plk3	21.0272	3.97523	1.07689	3.35018	0.000807585	0.00382068	up in P0
Capn9	46.7404	3.97596	0.963772	4.05368	5.04191e-05	0.000320845	up in P0
Pik3cd	53.1165	3.97972	0.79601	4.92769	8.32074e-07	7.61988e-06	up in P0
Slit1	288.727	3.98686	0.494279	8.04661	8.51223e-16	2.38465e-14	up in P0
Cd101	180.095	3.98957	0.993028	3.93109	8.45604e-05	0.00051445	up in P0
Cdh3	52.9451	3.99141	0.768397	5.09032	3.5746e-07	3.46952e-06	up in P0
Kcnt1	372.79	3.99279	0.53676	7.4265	1.11509e-13	2.56006e-12	up in P0
Cdkl5	379.995	3.99592	0.466386	8.55216	1.20802e-17	3.92288e-16	up in P0
Gnai2	115.09	3.99896	0.951817	4.24062	2.22908e-05	0.000153099	up in P0
Zbtb9	438.284	4.00032	0.508123	7.86319	3.74474e-15	9.93766e-14	up in P0
Pxdn	1013.51	4.00156	0.574446	6.96288	3.33383e-12	6.55608e-11	up in P0
Kif26b	4976.18	4.00288	0.295115	13.5626	6.673e-42	8.51842e-40	up in P0
1500009L16Rik	76.0985	4.00889	0.725025	5.44838	5.08317e-08	5.62568e-07	up in P0
Mybphl	28.666	4.01635	1.1984	3.127	0.00176601	0.0075385	up in P0
Clec18a	37.6379	4.0179	1.03856	3.75238	0.000175165	0.000983636	up in P0
Itpkb	130.082	4.01873	0.488472	8.17899	2.8624e-16	8.36025e-15	up in P0
Vstm2b	16.4463	4.02177	1.04441	3.61457	0.000300841	0.00159501	up in P0
Lgals4	21.3641	4.02218	0.951601	3.98954	6.62016e-05	0.000411378	up in P0
Nrg1	2429.13	4.02598	0.336825	11.9495	6.53e-33	5.28395e-31	up in P0
Chd3	1078.79	4.02616	0.342162	11.7649	5.92058e-32	4.59015e-30	up in P0
Stub1	18.3247	4.03459	1.06881	3.49716	0.000470244	0.00237091	up in P0
Lpcat2	97.828	4.03685	0.744305	5.36437	8.12328e-08	8.75687e-07	up in P0
Coro2a	143.13	4.03845	0.584317	6.8798	5.99355e-12	1.14667e-10	up in P0
Nfkb2	54.8199	4.04042	0.964284	4.15653	3.23121e-05	0.000213701	up in P0
Perm1	20.308	4.04766	1.08404	3.4864	0.000489574	0.00245417	up in P0
Mks1	34.1406	4.0478	0.830184	4.77244	1.82005e-06	1.5715e-05	up in P0
Mical1	10.7291	4.05408	1.20003	3.44528	0.00057047	0.00281115	up in P0
Eml3	57.9175	4.05968	0.672891	5.90515	3.52316e-09	4.70857e-08	up in P0
Dclk2	1849.63	4.068	0.359881	11.3024	1.27731e-29	8.83852e-28	up in P0
Slc16a11	43.0956	4.07051	0.903821	4.42349	9.71169e-06	7.2595e-05	up in P0
Gria4	1793.74	4.07357	0.324423	12.5544	3.75995e-36	3.56906e-34	up in P0
Dpysl5	1782.15	4.07518	0.259163	15.7179	1.14021e-55	2.96214e-53	up in P0
Adgre5	13.353	4.07738	1.14016	3.21885	0.00128704	0.00571298	up in P0
Mcrip2	62.3328	4.07997	0.977018	4.15165	3.30091e-05	0.000217922	up in P0
Mxra7	142.748	4.08346	0.486187	8.33504	7.74703e-17	2.36532e-15	up in P0
Gmip	168.901	4.08863	0.657019	6.19834	5.70614e-10	8.55227e-09	up in P0
Hrk	62.7343	4.08864	0.70671	5.70451	1.16675e-08	1.44579e-07	up in P0
Snhg17	272.422	4.08864	0.864024	4.72421	2.3101e-06	1.96372e-05	up in P0
Wnk4	249.143	4.09018	0.457211	8.88314	6.49966e-19	2.36479e-17	up in P0
Timp2	117.261	4.09158	0.718521	5.65295	1.57713e-08	1.91427e-07	up in P0
Ptk7	419.044	4.09344	0.366462	11.1477	7.34987e-29	4.92475e-27	up in P0
Add2	606.595	4.09707	0.548786	7.45627	8.90062e-14	2.0756e-12	up in P0
Adgrl1	2094.32	4.10666	0.296432	13.8491	1.28809e-43	1.85185e-41	up in P0
Pcdhb14	14.7502	4.10882	1.26768	3.34582	0.000820393	0.00386645	up in P0
Tmem131l	278.601	4.10948	0.538665	7.61351	2.66743e-14	6.43311e-13	up in P0
T2	71.5054	4.12673	0.913287	4.4205	9.84726e-06	7.34971e-05	up in P0
Stag3	65.3911	4.12744	0.718913	5.64806	1.62268e-08	1.96634e-07	up in P0
Alx4	22.6938	4.12926	1.0789	3.62566	0.000288229	0.00153601	up in P0
Speer4a	14.426	4.13049	1.22502	3.50825	0.00045106	0.0022843	up in P0
Mapk3	25.1683	4.13372	0.870236	4.55894	5.14122e-06	4.04503e-05	up in P0
Sorbs2	6492.45	4.13693	0.218154	18.9607	3.6032e-80	2.66781e-77	up in P0
Pbxip1	38.8088	4.14399	0.769038	5.21075	1.88079e-07	1.9102e-06	up in P0
Rtl1	1569.56	4.15391	0.489056	8.49478	1.98305e-17	6.35605e-16	up in P0
Gm1979	38.2163	4.15783	1.05283	3.7898	0.000150767	0.000858674	up in P0
Podxl2	2049.21	4.15805	0.278561	14.9206	2.42159e-50	4.84581e-48	up in P0
Zfp663	18.3511	4.16007	1.07294	3.59034	0.000330243	0.00172983	up in P0
Plin5	24.2443	4.16351	1.04515	3.68221	0.00023122	0.0012639	up in P0
Arrdc1	144.001	4.16365	0.606298	6.82416	8.84386e-12	1.65982e-10	up in P0
Pkmyt1	148.763	4.16376	1.03148	3.9271	8.59768e-05	0.000522147	up in P0
Ap1s3	277.337	4.16422	0.477495	8.69373	3.50724e-18	1.19391e-16	up in P0
Erbin	199.908	4.16547	0.422414	9.81116	1.00807e-22	4.73891e-21	up in P0
H2-Bl	99.5204	4.16628	0.95173	4.2433	2.2026e-05	0.000151351	up in P0
Fam57b	166.493	4.16765	0.649934	6.37414	1.83993e-10	2.9328e-09	up in P0
Arhgef2	143.234	4.18157	0.590925	7.02995	2.06607e-12	4.15685e-11	up in P0
Fbln1	37.2529	4.18571	1.04678	3.87923	0.000104786	0.000621414	up in P0
Pak6	126.117	4.19007	0.702897	5.92039	3.2118e-09	4.308e-08	up in P0
Fmnl3	52.4119	4.19621	0.881491	4.66969	3.01656e-06	2.50669e-05	up in P0
Mpp2	55.9943	4.19694	0.878083	4.68702	2.77205e-06	2.31782e-05	up in P0
Hs6st3	21207.9	4.20135	0.198584	21.1558	2.44074e-99	3.28569e-96	up in P0
Timp3	614.347	4.20141	0.642448	6.53973	6.16294e-11	1.0406e-09	up in P0
Stard13	288.284	4.20202	0.42295	9.90369	4.01192e-23	1.94782e-21	up in P0
Fnbp1l	1017.59	4.20645	0.251008	16.7442	6.23895e-63	2.36888e-60	up in P0
Epb41l1	895.766	4.20685	0.458013	9.1785	4.3712e-20	1.74942e-18	up in P0
Gm12128	17.1919	4.20731	1.18251	3.23057	0.00123542	0.00551216	up in P0
Adamts5	50.7852	4.21092	0.843181	4.87668	1.07887e-06	9.6882e-06	up in P0
Dcdc2a	334.776	4.21167	0.405456	10.3581	3.84385e-25	2.12387e-23	up in P0
Gm5820	379.698	4.21185	0.61282	6.85717	7.02384e-12	1.33345e-10	up in P0
Kcnk3	89.0973	4.21348	0.719126	5.79433	6.85925e-09	8.76375e-08	up in P0
Prr5	50.4789	4.23097	1.03565	4.05225	5.07271e-05	0.000322666	up in P0
Aox1	84.9427	4.23134	1.03557	3.93495	8.32141e-05	0.000507042	up in P0
Hcn3	140.384	4.23834	0.550844	7.64162	2.14498e-14	5.25005e-13	up in P0
1700086L19Rik	339.586	4.23855	0.478934	8.8283	1.06282e-18	3.75616e-17	up in P0
Adgra3	226.885	4.24106	0.72353	5.84719	4.99944e-09	6.56892e-08	up in P0
Marcksl1	12.3299	4.24118	1.21356	3.543	0.000395602	0.00202702	up in P0
Sbno2	372.782	4.24249	0.761432	5.56608	2.60537e-08	3.04501e-07	up in P0
Rac3	54.3191	4.24541	0.859824	4.83794	1.31192e-06	1.16329e-05	up in P0
Col6a2	42.2286	4.24752	0.862103	4.64598	3.38459e-06	2.77668e-05	up in P0
Rbm47	436.624	4.24849	0.310785	13.6427	2.23021e-42	2.94866e-40	up in P0
Cobl	467.39	4.25199	0.520849	8.14728	3.722e-16	1.07228e-14	up in P0
Fkbp1b	21.5237	4.258	0.978066	3.95458	7.66692e-05	0.000469722	up in P0
Oxct2b	10.9373	4.26142	1.29271	3.04146	0.00235437	0.00968702	up in P0
Defb9	23.4917	4.26294	1.13267	3.5161	0.000437942	0.00222243	up in P0
Gm8179	121.599	4.26543	0.551733	7.65311	1.96173e-14	4.83349e-13	up in P0
Casp3	286.62	4.27153	0.754494	5.6171	1.9419e-08	2.33028e-07	up in P0
Igsf9	17.8934	4.27318	1.2704	3.44488	0.000571313	0.00281437	up in P0
Cpne7	95.0378	4.2791	0.647059	6.48128	9.09505e-11	1.50312e-09	up in P0
Magi1	2614.62	4.28066	0.24635	17.3726	1.33121e-67	6.79745e-65	up in P0
Pld5	2439.87	4.28962	0.225216	19.0369	8.43987e-81	6.57777e-78	up in P0
4932413F04Rik	10.842	4.29118	1.29161	3.06027	0.00221139	0.00919062	up in P0
Yif1a	37.626	4.29221	0.909712	4.50476	6.64473e-06	5.12377e-05	up in P0
Cbarp	167.539	4.2993	0.56623	7.53135	5.02167e-14	1.18787e-12	up in P0
Pdik1l	29.607	4.30045	1.26749	3.68495	0.00022875	0.00125132	up in P0
Carhsp1	49.4107	4.30194	0.851522	4.93822	7.88393e-07	7.24676e-06	up in P0
Clmp	351.125	4.30997	0.634815	6.78624	1.15097e-11	2.12778e-10	up in P0
Arhgef7	358.827	4.31369	0.703493	6.1207	9.31661e-10	1.35887e-08	up in P0
Lbh	109.792	4.31574	0.682838	6.20435	5.49251e-10	8.24043e-09	up in P0
Sema4c	65.287	4.32258	0.72646	5.83415	5.40671e-09	7.06642e-08	up in P0
Nkpd1	14.3869	4.32523	1.10761	3.45367	0.000553016	0.00273424	up in P0
Gm5796	204.49	4.32851	0.615888	7.00968	2.3887e-12	4.77353e-11	up in P0
Lrrc75b	35.5784	4.33334	1.13661	3.60597	0.000310986	0.00164291	up in P0
Stard8	20.4036	4.3366	1.28108	3.5297	0.000416025	0.00212284	up in P0
Ephb6	90.251	4.34116	1.07202	4.09234	4.27035e-05	0.000275415	up in P0
Crhr1	57.4429	4.3434	0.938765	4.61671	3.89879e-06	3.14794e-05	up in P0
Trf	97.2746	4.34439	0.981284	4.28819	1.80137e-05	0.000126781	up in P0
Dapk1	4933.98	4.35282	0.307573	14.1501	1.86469e-45	2.87628e-43	up in P0
Fgf1	382.658	4.36042	0.660541	6.58643	4.50542e-11	7.75771e-10	up in P0
Mpp6	151.007	4.36454	0.476621	9.09117	9.79816e-20	3.85881e-18	up in P0
Tunar	127.699	4.36624	0.555183	7.7772	7.41456e-15	1.90616e-13	up in P0
Plekhn1	56.7313	4.37036	0.887397	4.81163	1.49701e-06	1.3117e-05	up in P0
Gja5	13.375	4.38256	1.18438	3.24794	0.00116243	0.00523039	up in P0
H2-M5	10.9155	4.38345	1.22471	3.53204	0.000412372	0.00210638	up in P0
Nrsn1	67.0853	4.3842	0.714765	5.97871	2.24911e-09	3.0895e-08	up in P0
Dock11	201.85	4.38754	0.546837	7.98231	1.43616e-15	3.93828e-14	up in P0
Mlf1	17.3739	4.396	1.05124	3.77863	0.000157697	0.000895732	up in P0
Pkdcc	143.085	4.39815	0.69676	6.27199	3.56457e-10	5.49835e-09	up in P0
Cables1	171.975	4.39935	0.702483	6.22657	4.7677e-10	7.18942e-09	up in P0
Ppp1r1a	182.809	4.39966	0.589793	7.39532	1.41069e-13	3.20392e-12	up in P0
Cacna1c	4778.78	4.405	0.340369	12.9399	2.67869e-38	2.78761e-36	up in P0
Cdc42ep4	56.9776	4.40724	0.685141	6.2992	2.99193e-10	4.66362e-09	up in P0
Srrm4os	209.724	4.40881	0.715913	6.13834	8.33892e-10	1.22381e-08	up in P0
Arhgap33	533.519	4.40975	0.435587	10.1013	5.45236e-24	2.78409e-22	up in P0
Plcl1	599.25	4.41339	0.299396	14.717	5.01675e-49	8.84381e-47	up in P0
Rad54l	115.76	4.41364	1.01786	4.25076	2.13043e-05	0.000147074	up in P0
Lgi1	143.092	4.42089	0.507737	8.61467	7.01437e-18	2.32369e-16	up in P0
Cfb	95.1689	4.42294	0.545353	8.0003	1.24116e-15	3.41618e-14	up in P0
Axdnd1	14.8923	4.42401	1.19218	3.73851	0.000185117	0.00103476	up in P0
Gng12	262.588	4.43277	0.473034	9.33136	1.04521e-20	4.35986e-19	up in P0
Gpc3	69.6771	4.43409	0.758528	5.72998	1.00445e-08	1.2573e-07	up in P0
Stac2	306.586	4.43935	0.696783	6.34966	2.15785e-10	3.41019e-09	up in P0
C77080	50.1005	4.44166	0.837487	5.17882	2.23298e-07	2.24328e-06	up in P0
Mmp11	10.4256	4.44223	1.22037	3.55955	0.000371485	0.00191671	up in P0
Triobp	188.855	4.44307	0.60584	7.30632	2.74555e-13	6.09537e-12	up in P0
Vps37d	70.0263	4.45253	0.969849	4.48295	7.36167e-06	5.66e-05	up in P0
Nkain3	4283.64	4.45884	0.427177	10.4369	1.68264e-25	9.51011e-24	up in P0
Xlr	17.6905	4.46484	1.28415	3.36172	0.000774577	0.00368571	up in P0
Zcchc12	14.2316	4.46538	1.18291	3.77109	0.000162536	0.000921098	up in P0
Nrip2	57.1389	4.46541	0.951117	4.58107	4.626e-06	3.69282e-05	up in P0
Slc22a17	363.874	4.46557	0.487859	9.11734	7.69924e-20	3.04028e-18	up in P0
Spred2	386.542	4.46638	0.351246	12.6741	8.23044e-37	7.96578e-35	up in P0
Frmd4b	1251.08	4.46971	0.456387	9.7855	1.29952e-22	6.03236e-21	up in P0
Ndst4	2034.12	4.47036	0.431269	10.3619	3.69474e-25	2.04913e-23	up in P0
Hpcal4	15.6105	4.47269	1.20844	3.73162	0.000190251	0.00106031	up in P0
Abtb1	182.465	4.47563	0.492169	9.02241	1.83989e-19	7.00388e-18	up in P0
Myh2	45.5093	4.47653	1.23656	3.34379	0.000826436	0.00389245	up in P0
Plekhb1	58.4542	4.47841	0.660024	6.58862	4.43946e-11	7.65304e-10	up in P0
Fam163b	24.8085	4.48742	1.12858	3.62945	0.000284021	0.00151527	up in P0
Speg	41.5403	4.49172	1.09378	4.12241	3.74926e-05	0.000244053	up in P0
Kcnn3	230.122	4.49217	0.735333	6.10371	1.03634e-09	1.5001e-08	up in P0
Ptprz1	479.54	4.50043	0.416973	10.7687	4.83548e-27	2.94666e-25	up in P0
Tmem200a	438.885	4.50849	0.49994	8.9955	2.35166e-19	8.88353e-18	up in P0
Fstl5	4656.99	4.51056	0.289366	15.5846	9.26163e-55	2.21203e-52	up in P0
1700034H15Rik	17.4153	4.51358	1.16706	3.87998	0.000104465	0.00062001	up in P0
Aqp1	11.8968	4.51379	1.28503	3.22175	0.00127408	0.00566395	up in P0
Kcp	38.0583	4.51477	1.08103	3.87265	0.000107659	0.000636156	up in P0
Ifi30	38.2872	4.51494	0.855136	4.83104	1.35824e-06	1.19862e-05	up in P0
Slc16a8	12.4218	4.51498	1.21631	3.65535	0.000256834	0.001385	up in P0
Ipcef1	186.148	4.52206	0.636079	7.0567	1.70498e-12	3.46328e-11	up in P0
Draxin	65.2596	4.5221	0.718694	6.16896	6.87393e-10	1.01789e-08	up in P0
Zfp566	51.8335	4.52558	0.88897	4.87802	1.07154e-06	9.62826e-06	up in P0
Rara	73.2628	4.52684	0.67194	6.43924	1.20074e-10	1.94535e-09	up in P0
Kcnk10	696.449	4.52713	0.34001	13.2929	2.54603e-40	3.01613e-38	up in P0
Ccdc70	38.0569	4.53544	0.983497	4.2508	2.13004e-05	0.000147074	up in P0
Lancl3	188.745	4.53707	0.52422	8.58858	8.8047e-18	2.89091e-16	up in P0
Postn	32.4666	4.53901	1.19174	4.02154	5.78193e-05	0.000362792	up in P0
Mad2l2	153.664	4.5418	0.739693	6.04024	1.53884e-09	2.16814e-08	up in P0
Bid	96.8692	4.54703	0.619583	7.14009	9.3268e-13	1.96181e-11	up in P0
Tspyl3	20.9284	4.56058	1.24817	3.71244	0.000205267	0.0011363	up in P0
Lhfpl2	155.665	4.56113	0.750601	6.05676	1.38892e-09	1.97382e-08	up in P0
Galntl6	14283.1	4.56903	0.275612	16.577	1.02238e-61	3.60463e-59	up in P0
Jazf1	522.178	4.57028	0.339453	13.4161	4.86832e-41	5.90902e-39	up in P0
Phactr1	4145.38	4.57232	0.545334	8.389	4.90275e-17	1.51566e-15	up in P0
Nynrin	76.9247	4.57315	0.811179	5.50761	3.63746e-08	4.13064e-07	up in P0
Fbn2	410.463	4.59466	0.336411	13.6202	3.03661e-42	3.9444e-40	up in P0
Car4	177.032	4.60483	0.816764	5.16178	2.44609e-07	2.44082e-06	up in P0
Slc9a5	512.86	4.62013	0.361757	12.7087	5.29113e-37	5.18557e-35	up in P0
Arhgap29	12.2961	4.6267	1.28685	3.32584	0.000881526	0.00411009	up in P0
Kcnj14	14.9515	4.63908	1.17297	3.89893	9.66178e-05	0.000578535	up in P0
Matk	181.451	4.64194	0.504756	8.96318	3.15437e-19	1.18253e-17	up in P0
Atp2b3	804.795	4.64504	0.51108	9.07677	1.11845e-19	4.36992e-18	up in P0
Slc6a11	270.43	4.6454	0.441406	10.4417	1.59926e-25	9.10841e-24	up in P0
[truncated: 316 more rows]
