# Supplementary material for: 5-Hydroxymethylcytosine-mediated active demethylation is required for mammalian neuronal differentiation and function
Source: eLife. 2021 Dec 17;10:e66973. doi: 10.7554/eLife.66973 (PMC8683082; doi:10.7554/eLife.66973)
Supplement: Supplementary file 2. [file elife-66973-supp2.xlsx]

## Sheet: Sheet1
Chr	Start	End	Gene Name	Gene Description
chr6	108272646	108358260	Itpr1	inositol 1,4,5-trisphosphate receptor 1
chr6	108209931	108265472	Itpr1	inositol 1,4,5-trisphosphate receptor 1
chr4	8169631	8240202	Car8	carbonic anhydrase 8
chr11	100669657	100695452	Dhx58	DEXH (Asp-Glu-X-His) box polypeptide 58
chr5	120423843	120441118	Lhx5	LIM homeobox protein 5
chr17	79872208	79896806	Atl2	atlastin GTPase 2
chr10	90090835	90109116	Anks1b	ankyrin repeat and sterile alpha motif domain containing 1B
chr1	153652715	153672426	Rgs8	regulator of G-protein signaling 8
chr2	91942312	91967185	Dgkz	diacylglycerol kinase zeta
chr6	63300485	63382702	Grid2	glutamate receptor, ionotropic, delta 2
chr17	47896993	47925907	Foxp4	forkhead box P4
chr9	69288847	69325026	Rora	RAR-related orphan receptor alpha
chr5	122466487	122504054	Atp2a2	ATPase, Ca++ transporting, cardiac muscle, slow twitch 2
chr5	114566729	114599725	Fam222a	family with sequence similarity 222, member A
chr6	15182839	15201300	Foxp2	forkhead box P2
chr7	139427072	139494058	Inpp5a	inositol polyphosphate-5-phosphatase A
chr3	17783955	17802624	Mir124a-2	microRNA 124a-2
chr15	59046367	59083522	Mtss1	metastasis suppressor 1
chr5	37240217	37265126	Crmp1	collapsin response mediator protein 1
chr14	73368702	73385694	Itm2b	integral membrane protein 2B
chr6	63468817	63494400	Grid2	glutamate receptor, ionotropic, delta 2
chr6	113870078	113892648	Atp2b2	ATPase, Ca++ transporting, plasma membrane 2
chr15	36775123	36795083	Ywhaz	tyrosine 3-monooxygenase/tryptophan 5-monooxygenase activation protein, zeta polypeptide
chr9	51763097	51781640	Arhgap20	Rho GTPase activating protein 20
chr4	15880335	15906914	Calb1	calbindin 1
chr15	59016633	59033746	Mtss1	metastasis suppressor 1
chr4	24965815	25008500	Gpr63	G protein-coupled receptor 63
chr6	63254687	63299184	Grid2	glutamate receptor, ionotropic, delta 2
chr11	84509915	84536544	Lhx1	LIM homeobox protein 1
chr7	139386804	139424726	Inpp5a	inositol polyphosphate-5-phosphatase A
chr7	79497537	79527384	Mir9-3hg	Mir9-3 host gene
chr11	24073611	24099200	Bcl11a	B cell CLL/lymphoma 11A (zinc finger protein)
chr13	83718383	83745844	C130071C03Rik	RIKEN cDNA C130071C03 gene
chr8	111720813	111746280	Bcar1	breast cancer anti-estrogen resistance 1
chr15	58971219	59004802	Ndufb9	NADH dehydrogenase (ubiquinone) 1 beta subcomplex, 9
chr15	86168217	86187160	Cerk	ceramide kinase
chr7	137295733	137316336	Ebf3	early B cell factor 3
chr12	51658821	51693562	Ap4s1	adaptor-related protein complex AP-4, sigma 1
chr11	31869833	31903898	Cpeb4	cytoplasmic polyadenylation element binding protein 4
chr6	108425981	108465693	Mir7661	microRNA 7661
chr9	122568186	122586218	9530059O14Rik	RIKEN cDNA 9530059O14 gene
chr7	126271173	126292655	Sbk1	SH3-binding kinase 1
chr9	62519411	62538329	Coro2b	coronin, actin binding protein, 2B
chr2	158666781	158682774	Ppp1r16b	protein phosphatase 1, regulatory (inhibitor) subunit 16B
chr11	44616001	44635818	Ebf1	early B cell factor 1
