# Supplementary material for: 5-Hydroxymethylcytosine-mediated active demethylation is required for mammalian neuronal differentiation and function
Source: eLife. 2021 Dec 17;10:e66973. doi: 10.7554/eLife.66973 (PMC8683082; doi:10.7554/eLife.66973)
Supplement: Supplementary file 3. [file elife-66973-supp3.xlsx]

## Sheet: tet_TKO_deseq2
ENTREZID	SYMBOL	baseMean	log2FoldChange	lfcSE	stat	pvalue	padj
103583	Fbxw11	298.479	6.22413	0.534015	11.6554	2.15481e-31	2.41317e-27
66146	Maco1	360.582	-6.25069	0.543074	-11.5098	1.17723e-30	6.59192e-27
320299	Iqcb1	246.676	-5.88673	0.54891	-10.7244	7.82021e-27	2.91928e-23
14545	Gdap1	230.233	5.70781	0.551506	10.3495	4.20667e-25	1.17776e-21
234624	A330008L17Rik	334.369	4.18537	0.407141	10.2799	8.68208e-25	1.94461e-21
381668	Fbrsl1	439.821	5.72242	0.565572	10.1179	4.6009e-24	8.58758e-21
56075	Pdss1	163.679	5.09092	0.570265	8.92728	4.36627e-19	6.9854e-16
23807	Arih2	145.038	4.87708	0.576376	8.46162	2.63685e-17	3.69127e-14
56194	Prpf40a	161.777	-4.72374	0.567653	-8.32151	8.68473e-17	1.08067e-13
12818	Col14a1	216.434	4.31437	0.532993	8.09461	5.74468e-16	6.43347e-13
93691	Klf7	161.187	4.70464	0.584402	8.05034	8.25621e-16	8.40558e-13
106633	Ift140	159.625	4.52715	0.589931	7.67403	1.66673e-14	1.55547e-11
70160	Vps36	978.581	3.13884	0.420827	7.45875	8.73493e-14	7.5248e-11
218850	Fam208a	115.347	-4.34025	0.593069	-7.31829	2.51144e-13	2.00897e-10
81907	Tmem108	641.614	2.83068	0.423941	6.67707	2.43761e-11	1.81992e-08
66503	1810034E14Rik	129.292	3.99315	0.602124	6.63178	3.31663e-11	2.32143e-08
69697	Camsap3	1194.91	2.67251	0.413301	6.46624	1.0047e-10	6.61858e-08
72605	Car10	1425.13	1.86122	0.291817	6.37806	1.79346e-10	1.0571e-07
18545	Pcp2	16763.8	1.52216	0.238456	6.38342	1.7318e-10	1.0571e-07
225207	Zfp521	265.933	2.70667	0.426482	6.3465	2.20264e-10	1.23337e-07
18505	Pax3	209.293	3.50344	0.585438	5.9843	2.17318e-09	1.15893e-06
22774	Zic4	130.077	3.54087	0.608422	5.81975	5.89365e-09	2.98622e-06
69993	Chn2	629.255	2.83252	0.487266	5.81309	6.13296e-09	2.98622e-06
109006	Ciapin1	517.981	2.34216	0.404838	5.78542	7.23305e-09	3.24012e-06
14806	Grik2	1029.79	1.92843	0.333272	5.78636	7.1927e-09	3.24012e-06
320463	F630111L10Rik	76.1897	-3.50623	0.609695	-5.75079	8.88287e-09	3.82613e-06
217218	Atxn7l3	227.49	2.72187	0.476248	5.71524	1.09551e-08	4.54395e-06
320558	Sycp2	82.4585	3.41347	0.611072	5.58604	2.3231e-08	9.29158e-06
72258	Kcnk10	205.715	2.90988	0.522378	5.57045	2.54084e-08	9.81203e-06
790909	Gm11186	75.1381	3.39178	0.61107	5.55056	2.84763e-08	1.06302e-05
240064	Zfp799	109.524	3.35447	0.612741	5.47453	4.38667e-08	1.54362e-05
76785	2410124H12Rik	1348.05	-1.74708	0.319186	-5.47356	4.41075e-08	1.54362e-05
74846	4930405A21Rik	91.1093	-3.33915	0.612762	-5.44934	5.05559e-08	1.71568e-05
214572	Prmt7	1175.55	2.06651	0.380942	5.42474	5.80374e-08	1.91165e-05
66143	Eef1e1	591.323	1.84693	0.34343	5.3779	7.53599e-08	2.4113e-05
76559	Atg2b	328.989	3.22623	0.612644	5.26608	1.39365e-07	4.33541e-05
105504	Exoc5	1305.02	-1.52423	0.293013	-5.20193	1.97225e-07	5.96953e-05
74440	Cmip	2923.42	1.45373	0.279728	5.19694	2.02599e-07	5.9708e-05
234515	Inpp4b	522.045	2.32643	0.452343	5.14306	2.70299e-07	7.76174e-05
16510	Kcnh1	260.858	2.38784	0.473993	5.03771	4.71138e-07	0.000131907
229759	Olfm3	250.291	2.20472	0.440825	5.00135	5.69309e-07	0.000155505
110265	Msra	1157.52	2.04961	0.414718	4.94219	7.72488e-07	0.000205978
18016	Nf2	2673.88	1.50762	0.305786	4.9303	8.21031e-07	0.000213831
83398	Ndst3	189.766	2.37244	0.486504	4.87651	1.07977e-06	0.000274827
108013	Celf4	383.571	2.09201	0.43015	4.86343	1.15366e-06	0.000287108
52023	Pibf1	3599.68	1.42669	0.29395	4.85352	1.21289e-06	0.000295285
22368	Trpv2	130.336	2.85135	0.588496	4.84515	1.26514e-06	0.000301453
67394	4930404I05Rik	1115.16	-1.45591	0.302843	-4.80747	1.52854e-06	0.000356627
72772	Rint1	347.535	-1.86406	0.390755	-4.7704	1.83858e-06	0.00042021
100504007	Gm15787	165.981	-2.75716	0.580595	-4.74885	2.04579e-06	0.000458217
54446	Nfat5	3778.4	-1.66578	0.353894	-4.70701	2.51378e-06	0.000551996
110084	Dnah1	108.971	-2.75891	0.601022	-4.59036	4.42479e-06	0.000952947
236285	Lancl3	125.719	2.67855	0.586906	4.56385	5.0224e-06	0.00106124
74167	Nudt9	146.925	-2.415	0.530685	-4.55072	5.34619e-06	0.00110874
19296	Pvt1	3648.55	1.42309	0.315144	4.5157	6.31088e-06	0.00126206
109700	Itga1	94.1763	-2.7859	0.616453	-4.51924	6.20605e-06	0.00126206
319530	Zfp750	55.145	-2.77847	0.616398	-4.50759	6.55678e-06	0.00128824
239318	Plcxd3	1110.25	1.67459	0.374402	4.47269	7.72399e-06	0.0014914
68955	Srrm4	363.564	2.2911	0.513706	4.45994	8.19827e-06	0.00155614
353188	Adam32	331.666	-2.02154	0.454262	-4.45016	8.58072e-06	0.00160159
100036521	Umad1	348.082	-1.81333	0.410599	-4.4163	1.00404e-05	0.00184331
50496	E2f6	509.582	1.66949	0.379194	4.40273	1.06899e-05	0.0019309
16341	Eif3e	242.311	-2.38994	0.54653	-4.37294	1.22586e-05	0.00217911
19266	Ptprd	1035.74	2.16221	0.497601	4.34528	1.39097e-05	0.00243398
244886	Tmem266	467.687	2.49218	0.574251	4.33988	1.42563e-05	0.00245626
545681	Gm12992	1485.86	1.40702	0.32661	4.30794	1.6478e-05	0.00279602
93730	Lztfl1	720.61	-1.42772	0.334595	-4.26701	1.98111e-05	0.00331142
11604	Agrp	1329.5	2.53618	0.595507	4.25886	2.05468e-05	0.00338388
209195	Clic6	4041.22	-1.40606	0.332134	-4.2334	2.30189e-05	0.00373606
13198	Ddit3	174.302	2.18437	0.516691	4.22761	2.36182e-05	0.00377857
240690	St18	310.219	2.31352	0.552114	4.1903	2.78591e-05	0.00439429
66960	Mindy3	1464.54	-1.21114	0.290358	-4.17119	3.03013e-05	0.00471311
21892	Tll1	152.706	2.52545	0.609017	4.14676	3.37212e-05	0.00517321
106369	Ypel1	214.287	1.84931	0.448015	4.12778	3.6628e-05	0.00554321
72338	Wdr89	295.313	2.1118	0.516593	4.08793	4.3523e-05	0.00641335
230279	Tmem268	345.654	-1.94607	0.476046	-4.08798	4.35151e-05	0.00641335
29809	Rabgap1l	633.115	2.01723	0.498222	4.04886	5.14686e-05	0.00748568
12554	Cdh13	1388.51	1.19929	0.298339	4.0199	5.82231e-05	0.0083595
75669	Pik3r4	285.255	-1.77944	0.444043	-4.00737	6.13981e-05	0.00870376
56187	Rabggta	311.845	1.67545	0.421066	3.97908	6.91829e-05	0.00968474
11891	Rab27a	382.567	1.67816	0.423061	3.9667	7.28736e-05	0.00995258
432508	Cpsf6	2227.94	1.15858	0.291897	3.96913	7.21353e-05	0.00995258
74443	P4htm	572.197	1.52729	0.385732	3.95947	7.51169e-05	0.0100147
240038	Zfp994	430.594	-1.61535	0.407865	-3.96051	7.479e-05	0.0100147
56428	Mtch2	628.263	1.60507	0.407743	3.93648	8.26871e-05	0.0108943
22289	Kdm6a	1542.65	-1.59118	0.405982	-3.91933	8.87959e-05	0.0115631
114565	Zbtb21	469.013	1.67776	0.428675	3.91382	9.08464e-05	0.0116941
67884	1810043G02Rik	709.826	2.3603	0.604772	3.9028	9.50861e-05	0.0121008
70767	Prpf3	308.052	-1.88883	0.484595	-3.89774	9.70931e-05	0.0122077
77866	E130102H24Rik	145.323	-2.01066	0.516187	-3.89523	9.81066e-05	0.0122077
71206	Katnal2	716.251	2.04221	0.525002	3.8899	0.000100284	0.0123415
13481	Dpm2	256.273	1.6888	0.434606	3.88581	0.000101988	0.0124148
12180	Smyd1	62.093	2.30453	0.59624	3.86511	0.00011104	0.0132291
54216	Pcdh7	2334.43	1.8348	0.474645	3.86563	0.000110803	0.0132291
242418	Dcaf10	425.447	-1.46185	0.379651	-3.85051	0.00011787	0.0138951
244556	Zfp791	409.671	1.47232	0.383798	3.83618	0.000124965	0.014578
353326	Rtl1	1167.49	1.73716	0.45371	3.82879	0.000128774	0.0148674
110595	Timp4	46.5694	2.33616	0.614476	3.80188	0.000143604	0.0161151
14802	Gria4	660.813	2.1135	0.555984	3.80137	0.000143897	0.0161151
22193	Ube2e3	387.217	-1.53713	0.404359	-3.8014	0.000143879	0.0161151
320712	Abi3bp	74.7672	-2.20005	0.579525	-3.79629	0.000146876	0.0162858
67433	Ccdc127	372.441	1.43556	0.379189	3.78586	0.000153175	0.0168178
71082	4933416M07Rik	50.745	2.31839	0.614161	3.7749	0.000160074	0.0172372
93687	Csnk1a1	2228.08	1.71641	0.45458	3.7758	0.000159492	0.0172372
75079	Zbtb49	461.071	2.1218	0.565222	3.75393	0.000174084	0.0185673
72946	Lrrc47	437.801	1.9357	0.516467	3.74796	0.000178279	0.0188353
234776	Atmin	173.824	1.9146	0.5114	3.74383	0.000181233	0.0189685
51800	Bok	60.6305	-2.2393	0.599196	-3.73717	0.000186107	0.0192982
110147	Ehmt2	157.424	1.89717	0.50959	3.72293	0.000196923	0.0202325
19300	Abcd4	391.14	1.42023	0.381762	3.7202	0.000199069	0.020267
56401	P3h1	341.589	-1.46529	0.394724	-3.7122	0.000205469	0.0207302
207592	Tbc1d16	1155.44	1.31916	0.355853	3.70704	0.000209692	0.0209673
16651	Sspn	11758.9	1.11477	0.301223	3.70082	0.000214908	0.0212987
18036	Nfkbib	219.663	2.26127	0.614861	3.67769	0.000235353	0.0229193
170930	Sumo2	145.752	-1.85035	0.503062	-3.67818	0.000234903	0.0229193
319586	Celf5	57.0525	2.23743	0.609727	3.66956	0.000242965	0.0233011
26430	Parg	1052.93	-1.33283	0.363262	-3.66907	0.000243435	0.0233011
233335	Synm	158.018	-1.82389	0.498776	-3.65674	0.00025544	0.024243
260302	Gga3	1478.18	-1.49493	0.409208	-3.65322	0.000258968	0.0243713
233863	Gtf3c1	2894.74	1.35387	0.371052	3.64873	0.000263539	0.0245948
117606	Boc	158.435	2.10583	0.578499	3.64016	0.000272466	0.0252177
432572	Specc1	232.652	1.65349	0.454673	3.63667	0.00027619	0.0253529
100169864	Gm44504	107.371	2.00448	0.551584	3.63405	0.000279008	0.0254034
50911	Exosc9	133.529	-1.83587	0.506112	-3.6274	0.00028629	0.0258562
100861571	DQ267101	1096.26	-1.48008	0.408614	-3.62221	0.000292102	0.0259623
107508	Eprs	2034.27	-1.49909	0.413818	-3.62258	0.000291684	0.0259623
69666	Psmg4	142.216	1.89178	0.52622	3.59504	0.000324339	0.0280616
239510	Phf20l1	2141.26	-0.963862	0.268193	-3.59392	0.000325744	0.0280616
100662	D930016D06Rik	778.612	-1.18408	0.329022	-3.59878	0.000319709	0.0280616
435376	Atp6ap1l	863.296	-1.31498	0.365778	-3.59502	0.000324361	0.0280616
234138	Tti2	69.8041	-2.19744	0.611778	-3.59189	0.000328283	0.0280644
230761	Zfp362	530.033	1.32845	0.370354	3.58699	0.000334523	0.0283813
77048	Cep83	1365.95	-1.03819	0.290347	-3.5757	0.000349294	0.0294116
98267	Stk17b	2894.62	-0.972724	0.272345	-3.57166	0.000354727	0.0296461
215114	Hip1	325.473	2.00174	0.561151	3.56721	0.000360804	0.0297106
271849	Shc4	2493.44	1.54721	0.433591	3.56837	0.000359212	0.0297106
320609	Strip2	1636.65	1.20068	0.337453	3.55806	0.000373599	0.0305396
67053	Rpp14	94.8791	2.08928	0.587955	3.55347	0.000380182	0.0308526
21888	Tle4	1118.68	-1.29028	0.364516	-3.5397	0.000400582	0.0322742
72753	2810442N19Rik	164.106	2.16781	0.613357	3.53434	0.000408792	0.0326179
238323	Rps6kl1	403.099	1.63573	0.463137	3.53184	0.000412674	0.0326179
69926	Dnah17	186.309	-2.16894	0.614211	-3.53126	0.000413585	0.0326179
232983	Cxcl17	64.8827	2.15134	0.611106	3.5204	0.00043089	0.0331949
23945	Mgll	62.9998	2.12967	0.604798	3.52129	0.00042946	0.0331949
12036	Bcat2	499.189	1.58117	0.44908	3.5209	0.000430081	0.0331949
433375	Creg1	609.046	-1.30046	0.369526	-3.51926	0.000432757	0.0331949
58214	Cst10	104.892	1.87959	0.535647	3.509	0.000449788	0.0342665
17076	Ly75	154.651	-2.14757	0.614006	-3.49764	0.000469391	0.0355183
230157	Tmeff1	47.1739	2.14164	0.61566	3.47861	0.000504029	0.0377054
50907	Preb	1175.31	2.06969	0.595768	3.47398	0.000512799	0.0377054
14859	Gsta3	148.543	1.95952	0.563712	3.4761	0.000508767	0.0377054
234725	Zfp612	342.821	1.71579	0.494071	3.47276	0.000515128	0.0377054
14357	Dtx1	1601.53	1.19655	0.34441	3.4742	0.000512373	0.0377054
219140	Spata13	86.2306	2.13158	0.615234	3.46466	0.000530895	0.0384877
12723	Clcn1	96.5496	1.95605	0.564719	3.46376	0.00053269	0.0384877
22759	Zfp97	294.905	1.8578	0.536747	3.46122	0.000537727	0.0386026
114714	Rad51c	91.0309	-2.0493	0.592604	-3.45813	0.000543943	0.0388001
15185	Hdac6	496.606	1.61382	0.467602	3.45128	0.00055794	0.0395467
57740	Stk32c	88.3864	2.02819	0.590367	3.43548	0.000591504	0.0411444
384763	Zfp667	286.11	1.93223	0.561899	3.43874	0.000584425	0.0411444
13823	Epb41l3	1793.84	-1.65015	0.480317	-3.43554	0.000591375	0.0411444
71844	Nupl1	661.318	-1.14013	0.333049	-3.4233	0.000618664	0.042768
217866	Cdc42bpb	3901.72	-1.66472	0.489061	-3.40392	0.000664259	0.0456383
67017	Fam210b	158.634	1.99499	0.587775	3.39413	0.000688468	0.0470131
171429	Slc26a6	53.0917	2.06616	0.609471	3.39009	0.000698704	0.0473073
104112	Acly	713.698	1.76868	0.521872	3.3891	0.000701225	0.0473073
100642166	Gm15446	120.638	1.90545	0.563484	3.38154	0.000720803	0.048337
14107	Fat1	585.161	1.17656	0.348396	3.37707	0.000732634	0.0488379
14803	Grid1	187.934	1.90723	0.565694	3.37149	0.000747623	0.0494486
69821	Mterf4	73.8022	-2.0769	0.61622	-3.37039	0.000750626	0.0494486
211482	Efhb	38.0961	-2.04759	0.609316	-3.36047	0.000778106	0.0509591
19418	Rasgrf2	40.1436	2.04641	0.60944	3.35786	0.000785497	0.0511441
67490	Ufl1	701.771	-1.08847	0.325959	-3.33927	0.000839979	0.0543753
56459	Sae1	199.992	1.8763	0.56405	3.32649	0.000879485	0.0557575
50875	Tmod3	621.201	1.19693	0.360048	3.32436	0.000886224	0.0557575
269400	Rtel1	2089.84	-1.24988	0.37588	-3.32522	0.000883489	0.0557575
66377	Ndufc1	102.839	-1.90849	0.573688	-3.3267	0.000878794	0.0557575
54215	Cd160	101.644	-1.94023	0.583234	-3.32668	0.000878871	0.0557575
14708	Gng7	98.5518	2.04407	0.615787	3.31944	0.000901984	0.056432
19270	Ptprg	597	1.3252	0.400092	3.31223	0.000925543	0.0575842
20402	Zfp106	1017.45	-1.12564	0.340255	-3.30822	0.000938927	0.0580941
100310872	Dynlt1a	1627.41	1.01641	0.307824	3.30191	0.000960275	0.0590886
75645	Ccdc172	292.237	-1.46325	0.444182	-3.29425	0.000986839	0.0603913
100038566	Gm10658	152.023	-1.67286	0.509005	-3.28653	0.0010143	0.0614005
19712	Rest	39.9436	-2.02314	0.615507	-3.28696	0.00101277	0.0614005
20317	Serpinf1	92.919	1.96206	0.598486	3.27837	0.00104409	0.0625279
69694	Tatdn1	1765.52	-1.04236	0.317839	-3.27952	0.00103984	0.0625279
21413	Tcf4	240.317	1.65335	0.50471	3.27584	0.00105348	0.0626448
72018	Fundc1	442.725	1.38703	0.423545	3.27481	0.00105734	0.0626448
268395	Mpg	98.4881	-1.81552	0.554637	-3.27335	0.00106282	0.0626448
26950	Vsnl1	146.481	1.77827	0.543998	3.26889	0.00107972	0.0633078
74570	Zkscan1	779.904	1.48323	0.454007	3.26698	0.00108703	0.0634042
238799	Tnpo1	1310.59	1.32471	0.406271	3.26066	0.00111154	0.0644979
234814	Mthfsd	774.649	1.2451	0.382062	3.25891	0.00111843	0.0645631
80907	Lactb	301.703	1.34428	0.412987	3.25502	0.00113384	0.0651171
56717	Mtor	4063.64	-0.951225	0.292454	-3.25257	0.00114368	0.0653473
26378	Decr2	283.391	-1.4898	0.458758	-3.24747	0.00116436	0.066191
20666	Sox11	38.0441	-1.99151	0.613914	-3.24396	0.00117881	0.0666745
69274	Ctdspl	151.623	1.99606	0.616246	3.23906	0.00119924	0.0671515
244418	Prag1	65.313	1.9906	0.614354	3.24014	0.00119469	0.0671515
223927	Gtsf2	120.879	1.99277	0.616284	3.23352	0.00122273	0.0678128
214968	Sema6d	138.317	1.59785	0.494599	3.23061	0.00123527	0.0678128
68295	Aar2	262.625	1.35465	0.419245	3.23117	0.00123284	0.0678128
70551	Tmtc4	779.336	1.09092	0.337568	3.2317	0.00123057	0.0678128
213742	Xist	6963.68	-1.43109	0.443336	-3.228	0.00124657	0.0680991
70924	4921511C10Rik	38.6904	1.98787	0.616246	3.22577	0.00125633	0.0682994
20564	Slit3	100.283	1.82339	0.566408	3.21921	0.00128543	0.0692094
56195	Ptbp2	1913.05	-1.10127	0.34207	-3.21941	0.00128453	0.0692094
14633	Gli2	91.8288	1.90244	0.592531	3.21071	0.00132408	0.0709493
320150	Zdhhc17	157.865	1.93951	0.605022	3.20569	0.0013474	0.071855
67179	Ccdc25	888.47	-1.04711	0.327321	-3.19904	0.00137885	0.072987
233064	Wdr62	35.6844	-1.94407	0.607815	-3.19845	0.00138166	0.072987
320683	Zfp629	232.482	1.55035	0.485457	3.19359	0.00140516	0.0732438
382207	Jade3	1418.6	-0.931487	0.291472	-3.19581	0.0013944	0.0732438
13929	Amz2	169.706	-1.67327	0.523979	-3.19339	0.00140614	0.0732438
76608	Hectd3	343.044	1.89185	0.593296	3.18871	0.0014291	0.0740947
53869	Rab11a	425.299	-1.19583	0.375313	-3.18621	0.0014415	0.0741954
15531	Ndst1	48.7557	-1.92928	0.605615	-3.18565	0.00144429	0.0741954
230868	Igsf21	144.042	1.61589	0.507774	3.18231	0.00146108	0.0747151
26372	Clcn6	1363.7	1.16453	0.366356	3.17868	0.00147949	0.0747178
100302730	5830417I10Rik	995.775	1.16012	0.365006	3.17835	0.00148115	0.0747178
71891	Cdadc1	332.502	-1.65341	0.520028	-3.17947	0.00147546	0.0747178
56292	Naa10	267.96	1.69424	0.533518	3.1756	0.0014953	0.0750933
66642	Ctnnbl1	1616.67	0.908841	0.286944	3.16732	0.00153853	0.0760395
70646	Naa30	160.853	-1.69851	0.53576	-3.17028	0.00152294	0.0760395
66528	Smim5	63.6699	-1.91544	0.604852	-3.16679	0.00154129	0.0760395
18007	Neo1	134.581	-1.94198	0.612786	-3.1691	0.00152911	0.0760395
18189	Nrxn1	5413.43	-1.16433	0.368007	-3.16387	0.00155685	0.0764703
20354	Sema4d	559.423	1.43119	0.45336	3.15686	0.00159478	0.0777467
209586	Nudcd3	572.924	1.10027	0.348853	3.15398	0.00161061	0.0777467
81003	Trim23	285.039	-1.5037	0.476383	-3.15649	0.0015968	0.0777467
78651	Lsm6	255.761	-1.64995	0.522982	-3.15489	0.00160557	0.0777467
57028	Pdxp	61.9326	1.93165	0.613404	3.14907	0.00163793	0.0784646
103080	2020-09-10	143.417	-1.78187	0.565891	-3.14879	0.0016395	0.0784646
333789	N4bp2	961.51	-1.30553	0.414888	-3.14671	0.00165117	0.0786869
13842	Epha8	490.09	1.24233	0.395859	3.1383	0.00169928	0.0805754
211673	Arfgef1	3039.06	-0.928798	0.296051	-3.13729	0.00170518	0.0805754
18117	Emc8	190.239	1.52202	0.485926	3.1322	0.00173499	0.0813921
11834	Aqr	926.001	-1.01239	0.323256	-3.13186	0.001737	0.0813921
223921	Aaas	54.9838	1.89089	0.604401	3.12854	0.00175676	0.0819746
18208	Ntn1	140.023	1.92306	0.616427	3.11969	0.00181039	0.0841267
67439	Xab2	291.551	1.26432	0.406022	3.11391	0.00184623	0.0854378
68077	Nop53	38.3604	-1.88114	0.604404	-3.1124	0.00185575	0.0855248
12288	Cacna1c	1272.4	1.34208	0.431846	3.10777	0.00188503	0.0865182
116904	Alpk3	104.698	1.91296	0.615855	3.10618	0.00189519	0.0866297
78816	Gmip	222.412	1.41603	0.456909	3.09914	0.00194081	0.088354
21985	Tpd52	699.524	-1.27615	0.411963	-3.09772	0.00195015	0.0884201
19229	Ptk2b	1332.04	1.19548	0.386861	3.09022	0.0020001	0.0903192
140500	Acap3	36.2984	1.86447	0.604213	3.08578	0.00203017	0.0903975
55983	Pdzrn3	3767.68	0.919275	0.297939	3.08545	0.00203246	0.0903975
74769	Pik3cb	413.403	-1.19962	0.38883	-3.0852	0.00203413	0.0903975
74718	Snx16	257.845	-1.45658	0.471802	-3.08726	0.00202009	0.0903975
106957	Slc39a6	96.1573	-1.78848	0.580445	-3.08122	0.00206152	0.0912527
67803	Limd2	42.4917	-1.89175	0.614566	-3.07819	0.00208265	0.0918252
70350	Basp1	69.6243	1.79903	0.58546	3.07286	0.00212021	0.092873
11303	Abca1	648.237	1.51442	0.492902	3.07246	0.002123	0.092873
17129	Smad5	974.369	1.6594	0.540476	3.07026	0.00213872	0.0931968
66824	Pycard	55.415	1.88427	0.614942	3.06415	0.00218293	0.0937171
67131	Acbd4	691.932	1.28739	0.420169	3.06398	0.00218414	0.0937171
67873	Mri1	413.673	1.1653	0.380261	3.06448	0.00218046	0.0937171
69740	Dph5	176.232	-1.46732	0.478727	-3.06504	0.00217642	0.0937171
23853	Def6	44.8028	1.84516	0.603121	3.05935	0.00221815	0.0944526
13809	Enpep	49.7499	-1.86785	0.610388	-3.06011	0.00221255	0.0944526
20523	Slc25a14	393.542	-1.38051	0.451545	-3.0573	0.00223337	0.0947405
19378	Aldh1a2	67.926	1.86943	0.612039	3.05443	0.0022549	0.0952928
17865	Mybl2	235.121	1.87922	0.616026	3.05055	0.00228421	0.0961685
214791	Sertad4	169.867	1.71411	0.56215	3.0492	0.00229452	0.096241
78893	Cnot10	1944.67	-1.33235	0.437864	-3.04283	0.00234362	0.0976536
75099	Lysmd4	81.2894	-1.74235	0.572657	-3.04257	0.00234564	0.0976536
216565	Ehbp1	214.747	-1.51608	0.498585	-3.04076	0.00235981	0.0978796
20377	Sfrp1	466.983	1.67185	0.550621	3.03629	0.00239506	0.0978916
234854	Cdk10	482.197	1.18982	0.391782	3.03695	0.00238988	0.0978916
75560	Ep400	2355.6	-0.804274	0.264823	-3.03703	0.00238921	0.0978916
69358	Lrrc51	142.4	-1.64761	0.542419	-3.03752	0.00238532	0.0978916
228536	Bahd1	223.072	1.3659	0.451104	3.02791	0.00246253	0.100283
12189	Brca1	126.783	1.75446	0.581308	3.01813	0.00254343	0.10283
67054	Paics	199.299	-1.43469	0.475274	-3.01865	0.00253906	0.10283
208213	Tmem132c	5185.02	0.980248	0.325593	3.01066	0.00260681	0.105013
14397	Gabra4	1187.01	-1.76154	0.586042	-3.00583	0.00264859	0.106314
68666	Svop	412.23	1.29167	0.429932	3.00435	0.0026615	0.10645
240023	Pnldc1	212.434	-1.49286	0.497454	-3.001	0.00269095	0.107245
407786	Taf9b	98.3822	-1.8432	0.615084	-2.99666	0.00272958	0.108399
60534	Fancg	71.1899	1.73768	0.580488	2.99349	0.00275809	0.10876
94191	Adarb2	490.302	1.25939	0.420636	2.99402	0.0027533	0.10876
215708	Miga1	301.564	1.54498	0.516676	2.99023	0.00278771	0.109542
320405	Cadps2	279.215	1.81018	0.605986	2.98717	0.00281576	0.110258
225432	Rbm27	33.1712	1.79532	0.601821	2.98316	0.00285293	0.111115
70430	Tbce	1743.24	-0.881559	0.295561	-2.98267	0.00285749	0.111115
14269	Fnbp1	212.533	1.51264	0.507448	2.98088	0.00287423	0.111242
26405	Map3k2	1593.76	-0.898697	0.301752	-2.97826	0.00289886	0.111242
16650	Kpna6	1043.66	-0.903217	0.303378	-2.9772	0.00290896	0.111242
76022	Gon4l	2838.98	-1.2406	0.416343	-2.97975	0.00288485	0.111242
26557	Homer2	86.8887	-1.79881	0.604227	-2.97704	0.00291044	0.111242
22288	Utrn	203.031	1.40416	0.472332	2.97283	0.00295068	0.111638
94109	Csmd1	924.599	1.28089	0.430715	2.97387	0.00294069	0.111638
216238	Eea1	1083.52	-1.26971	0.427035	-2.97332	0.00294592	0.111638
14962	Cfb	170.211	1.8278	0.615442	2.9699	0.00297896	0.112328
71685	Galnt14	153.857	1.7574	0.591957	2.96879	0.00298973	0.112356
72320	Kif1bp	555.92	-1.23488	0.416789	-2.96284	0.00304817	0.114169
232987	B9d2	175.816	1.68281	0.568333	2.96097	0.00306676	0.114482
19699	Reln	208.713	1.59814	0.540638	2.95603	0.00311623	0.115942
233168	AI987944	59.6303	-1.80124	0.609907	-2.95331	0.00314389	0.116584
20497	Slc12a3	552.782	1.36863	0.463825	2.95076	0.00316997	0.116973
11855	Arhgap5	2434.03	1.10548	0.374709	2.95024	0.00317526	0.116973
27528	Nrep	85.2784	1.80407	0.612145	2.94714	0.0032073	0.117766
17388	Mmp15	26.6395	1.80438	0.613	2.94353	0.00324493	0.118758
22153	Tubb4a	177.493	1.63171	0.555196	2.93897	0.00329302	0.120061
97895	Nlrp4f	104.193	-1.56333	0.532084	-2.93813	0.00330198	0.120061
433022	Plcxd2	1033.64	0.879499	0.299557	2.936	0.00332478	0.120472
21812	Tgfbr1	574.313	-1.11657	0.380424	-2.93506	0.0033348	0.120472
108686	Ccdc88a	9182.4	-0.8481	0.28916	-2.93298	0.00335722	0.120892
52897	Rbfox3	1264.05	1.42258	0.487382	2.91881	0.00351368	0.124174
329942	Csmd2	688.154	1.27067	0.435352	2.9187	0.00351489	0.124174
245000	Atr	1305.61	-0.918877	0.314588	-2.92089	0.00349034	0.124174
17155	Man1a	2634.22	-0.930004	0.318582	-2.91919	0.00350937	0.124174
66869	Zfp869	278.591	-1.35818	0.464684	-2.9228	0.00346895	0.124174
100043772	Zfp850	104.973	-1.70288	0.583203	-2.91987	0.00350179	0.124174
245020	Slc35g2	164.864	-1.56793	0.537984	-2.91444	0.00356322	0.125486
108068	Grm2	55.6317	1.74289	0.598759	2.91083	0.0036047	0.126549
98386	Lbr	337.878	-1.2306	0.422927	-2.90972	0.00361758	0.126604
110596	Arhgef28	202.294	1.77407	0.6105	2.90594	0.00366157	0.127348
320661	D5Ertd579e	51.6574	-1.75418	0.603651	-2.90594	0.00366148	0.127348
114663	Impa2	203.638	1.7809	0.613473	2.90299	0.00369623	0.12776
69957	Cdc16	321.179	-1.35497	0.466645	-2.90365	0.00368841	0.12776
68796	Tmem214	337.382	1.3616	0.469431	2.90054	0.00372519	0.128364
13001	Csnk2b	253.178	1.47397	0.508817	2.89686	0.0037692	0.129482
233826	Palb2	34.5016	1.78157	0.615888	2.89269	0.0038196	0.130812
268396	Sh3pxd2b	39.9538	1.77615	0.614712	2.88941	0.00385969	0.131783
20617	Snca	47.7995	1.75185	0.61154	2.86464	0.00417477	0.142107
231887	Pdap1	215.633	1.69918	0.59439	2.8587	0.00425377	0.142894
12662	Chm	2060.45	-0.788324	0.27582	-2.85811	0.0042617	0.142894
67429	Nudcd1	725.083	-0.918598	0.321347	-2.85859	0.0042553	0.142894
100494	Zfand2a	299.747	-1.15328	0.403175	-2.86049	0.00422986	0.142894
73991	Atl1	652.576	-1.68083	0.587459	-2.86119	0.00422059	0.142894
93834	Peli2	77.5407	1.73898	0.608838	2.85622	0.00428712	0.143318
76954	St5	496.846	1.26155	0.44195	2.85451	0.00431034	0.143665
69952	Tunar	96.7236	1.72574	0.60479	2.85346	0.00432466	0.143715
58859	Efemp2	246.446	1.28047	0.449082	2.8513	0.0043541	0.144265
75517	Ccdc34os	70.4579	1.72043	0.604208	2.84741	0.00440766	0.14543
50932	Mink1	4954.29	0.706734	0.24825	2.84686	0.00441522	0.14543
68188	Sympk	2211.54	1.01521	0.356728	2.84589	0.00442881	0.145449
100041286	Snhg15	264.24	1.74421	0.613363	2.84368	0.00445953	0.14603
16800	Arhgef2	49.9799	1.73552	0.610731	2.84171	0.00448718	0.146272
73341	Arhgef6	142.541	-1.60696	0.565572	-2.8413	0.00449303	0.146272
60611	Foxj2	532.191	1.4318	0.504183	2.83984	0.00451358	0.146515
619332	4933416C03Rik	48.0489	1.69107	0.596637	2.83434	0.00459208	0.147012
114716	Spred2	201.332	1.62095	0.571221	2.8377	0.00454401	0.147012
18753	Prkcd	1031.75	1.44244	0.508675	2.83567	0.00457293	0.147012
237615	Ankrd52	984.466	0.869359	0.306743	2.83417	0.00459455	0.147012
67136	Kbtbd4	178.716	-1.39087	0.490664	-2.83467	0.00458731	0.147012
54403	Slc4a4	465.485	1.50044	0.529806	2.83206	0.0046249	0.147562
213056	Fam126b	833.504	-0.938664	0.331657	-2.83022	0.00465153	0.147789
83946	Phip	1681.2	-0.939565	0.332031	-2.82975	0.0046584	0.147789
59013	Hnrnph1	839.128	-1.14019	0.403308	-2.82709	0.00469728	0.148601
78244	Dnajc21	468.468	1.45194	0.51399	2.82483	0.00473053	0.148742
234214	Sorbs2	2966.39	0.911287	0.322684	2.82408	0.00474158	0.148742
224694	Zfp81	336.557	-1.22483	0.433633	-2.82459	0.00473417	0.148742
11798	Xiap	998.478	-0.902473	0.3198	-2.82199	0.0047727	0.1493
68276	Toe1	61.7475	1.70228	0.604452	2.81624	0.00485893	0.151574
57764	Ntn4	39.0192	1.73251	0.616449	2.81047	0.00494689	0.153011
69563	Mrln	103.227	1.7199	0.612024	2.81018	0.00495136	0.153011
26368	Ceacam9	37.2979	1.67511	0.596309	2.80912	0.00496764	0.153011
218811	Sec24c	751.014	1.23692	0.440563	2.80759	0.00499132	0.153011
216560	Wdpcp	1021.29	-1.18617	0.422578	-2.80699	0.00500061	0.153011
67246	Resf1	530.502	-1.54709	0.551082	-2.80736	0.00499494	0.153011
71264	4933432I03Rik	150.459	-1.59504	0.567849	-2.80891	0.00497093	0.153011
14654	Glra1	85.2559	1.68455	0.60038	2.80581	0.00501898	0.153154
94092	Trim16	384.75	1.48057	0.528558	2.80115	0.00509208	0.154962
74352	Zfp84	159.414	-1.33817	0.478071	-2.7991	0.00512458	0.155529
326618	Tpm4	111.415	1.66937	0.597173	2.79545	0.0051827	0.156868
93896	Glp2r	144.439	1.60193	0.574202	2.78984	0.00527336	0.158128
245827	Fat2	99.2933	1.59022	0.570053	2.7896	0.00527729	0.158128
620592	Tmem28	193.876	-1.26346	0.452653	-2.79123	0.00525076	0.158128
330149	Hfm1	275.578	-1.27697	0.457795	-2.78938	0.00528083	0.158128
64138	Ctsz	51.319	-1.71459	0.615296	-2.78661	0.00532619	0.159061
75686	Nudt16	89.5149	1.71072	0.615866	2.77775	0.00547368	0.162599
18023	Nfe2l1	374.346	1.14523	0.412251	2.778	0.00546954	0.162599
100732	Mapre3	4110.54	1.03152	0.371536	2.77636	0.0054972	0.162866
14704	Gng3	50.9604	1.69085	0.609334	2.77491	0.00552163	0.163158
72999	Insig2	563.619	-1.08674	0.392141	-2.7713	0.00558335	0.164547
16527	Kcnk3	26.987	1.70211	0.614624	2.76935	0.00561683	0.164673
214345	Lrrc1	1793.8	-0.787571	0.28439	-2.76934	0.00561703	0.164673
18951	2020-09-05	804.279	1.15409	0.416877	2.76842	0.0056328	0.164704
13368	Dffb	624.571	1.65772	0.599521	2.76508	0.00569089	0.165173
17931	Ppp1r12a	1589.38	-0.788489	0.28501	-2.76653	0.00566557	0.165173
67144	Lrrc40	358.222	-1.07493	0.388769	-2.76495	0.00569309	0.165173
545091	Hnrnpa1l2-ps2	437.223	-1.06096	0.383992	-2.76298	0.00572761	0.165746
22245	Uck1	232.374	1.37061	0.497025	2.75763	0.00582225	0.167618
56278	Gkap1	720.603	1.00997	0.366192	2.75804	0.00581494	0.167618
100039045	Gm10471	43.8197	1.64697	0.597527	2.7563	0.00584589	0.167867
229004	Gmeb2	644.603	1.0753	0.390365	2.75461	0.00587624	0.167878
83997	Slmap	2344.88	-0.930659	0.337806	-2.75501	0.00586907	0.167878
84704	Snurf	1874.14	-0.87455	0.317723	-2.75256	0.00591316	0.168502
230815	Man1c1	97.2146	1.50939	0.548985	2.74941	0.00597021	0.169644
14312	Brd2	311.387	1.23601	0.449675	2.74868	0.00598352	0.169644
319786	B930059L03Rik	25.8108	1.64639	0.600474	2.74182	0.00610993	0.172791
30935	Tor3a	498.426	1.65558	0.604359	2.7394	0.00615519	0.172825
76184	Abca6	34.193	1.62716	0.594081	2.73895	0.00616351	0.172825
70012	Cep85	1305.44	1.51548	0.553572	2.73763	0.0061883	0.172825
67414	Mfn1	2181.95	-0.901062	0.329068	-2.73823	0.00617716	0.172825
28077	Med10	92.1366	-1.67175	0.610422	-2.73867	0.00616879	0.172825
231861	Tnrc18	3638.93	0.80407	0.293846	2.73636	0.00621222	0.173061
76551	Ccdc6	1825.11	0.869012	0.31777	2.73472	0.00624326	0.173495
269389	Tox2	233.129	1.27667	0.467322	2.7319	0.0062971	0.174558
75565	Sgf29	742.277	1.12169	0.411497	2.72587	0.00641327	0.175212
271564	Vps13a	2876.35	0.909552	0.333657	2.72601	0.00641055	0.175212
385668	Lca5l	817.228	-0.991366	0.36337	-2.72826	0.006367	0.175212
24061	Smc1a	403.679	-1.02196	0.374923	-2.7258	0.00641458	0.175212
22696	Zfp37	158.119	-1.317	0.482959	-2.72694	0.00639247	0.175212
58186	Rad18	286.449	-1.68119	0.615869	-2.72979	0.00633747	0.175212
73721	1110017D15Rik	127.07	1.56078	0.572905	2.72433	0.00644321	0.175566
243538	Cfap100	1961.8	1.2031	0.441752	2.72347	0.00646005	0.175597
269831	Tspan12	259.214	-1.36213	0.500307	-2.72259	0.0064772	0.175637
236732	Rbm10	1580.12	0.85759	0.31536	2.7194	0.00654012	0.176718
140492	Kcnn2	1982.14	0.819437	0.301554	2.71738	0.00658017	0.176718
75818	4930478L05Rik	257.68	-1.63653	0.602082	-2.71811	0.0065656	0.176718
77252	9430038I01Rik	72.0842	-1.67065	0.614537	-2.71854	0.006557	0.176718
232943	Klc3	76.4825	1.67051	0.61533	2.71482	0.00663109	0.176881
58869	Pex5l	162.48	1.66374	0.613548	2.71167	0.00669458	0.176881
16419	Itgb5	197.218	1.63905	0.604138	2.71303	0.00666709	0.176881
23963	Tenm1	207.112	1.34133	0.494238	2.71394	0.00664878	0.176881
225743	Rnf165	1332.75	1.08138	0.398577	2.7131	0.00666566	0.176881
219105	Zmym5	823.74	-0.992375	0.36598	-2.71156	0.0066968	0.176881
71877	Efhc1	89.3864	-1.55189	0.572242	-2.71194	0.00668898	0.176881
30841	Kdm2b	219.681	1.66272	0.613836	2.70873	0.00675406	0.177896
67149	Nkain1	38.9722	1.64184	0.606269	2.7081	0.006767	0.177896
56451	Suclg1	2397.14	1.55882	0.575903	2.70673	0.0067949	0.178211
330474	Zc3h4	568.151	1.3025	0.481759	2.70363	0.00685867	0.179463
140476	Strc	45.2887	1.64614	0.609369	2.70138	0.00690517	0.179492
13990	Smarcad1	1330.71	-0.802831	0.297135	-2.70191	0.00689424	0.179492
70823	Hmgxb4	409.336	-0.997958	0.369548	-2.70048	0.00692388	0.179492
51813	Ccnc	748.734	-1.20002	0.444351	-2.70061	0.00692132	0.179492
16882	Lig3	692.666	0.973201	0.36069	2.69817	0.00697227	0.180329
227157	Mpp4	70.1583	1.56867	0.581588	2.69721	0.00699227	0.18043
76218	6430710C18Rik	52.7016	1.65109	0.613105	2.69299	0.00708137	0.181891
74136	Sec14l1	2078.18	0.747535	0.27751	2.69373	0.00706581	0.181891
216877	Dhx33	495.233	-1.03441	0.384344	-2.69135	0.00711626	0.182368
240752	Pik3c2b	38.1317	1.65191	0.614552	2.68799	0.00718838	0.18284
74187	Katnb1	217.619	1.3721	0.510247	2.68909	0.00716479	0.18284
621976	Tmem170b	803.365	1.06671	0.396766	2.6885	0.00717731	0.18284
226519	Lamc1	793.864	0.888842	0.330738	2.68745	0.00719995	0.18284
78890	Trmt44	177.356	-1.46422	0.545079	-2.68625	0.00722599	0.183086
76421	1700028K03Rik	420.111	-1.50239	0.559535	-2.68507	0.00725138	0.18311
100503003	Gm17484	95.1942	-1.51287	0.563517	-2.68469	0.00725963	0.18311
52348	Vps37a	1240.01	-0.957046	0.356591	-2.68388	0.00727739	0.183145
56445	Dnaja2	369.346	-1.13808	0.424438	-2.68138	0.00733192	0.184104
57783	Tnip1	766.982	0.977314	0.364914	2.67821	0.00740178	0.185442
16452	Jak2	269.576	-1.22217	0.456525	-2.67712	0.00742582	0.185629
13559	E2f5	310.677	1.4446	0.540425	2.67309	0.00751558	0.187038
76857	Spopl	915.358	-1.02476	0.383333	-2.67328	0.00751128	0.187038
52856	Mtg2	310.278	-1.59622	0.597632	-2.67091	0.00756457	0.187839
83379	Klb	86.8886	1.62891	0.610783	2.66692	0.00765493	0.189663
76223	Agbl3	94.2054	-1.574	0.590367	-2.66614	0.00767269	0.189683
66834	Acot13	422.115	-1.48727	0.558004	-2.66535	0.00769094	0.189715
21682	Tec	186.711	1.61446	0.6063	2.66281	0.00774902	0.190728
16519	Kcnj3	7533.44	-0.725898	0.272908	-2.65987	0.00781718	0.191865
77697	Mmab	110.147	-1.57409	0.59191	-2.65934	0.00782946	0.191865
380654	Cfap54	161.911	1.58765	0.599018	2.65042	0.00803908	0.196571
235534	Pxylp1	99.0198	1.61401	0.610571	2.64345	0.00820655	0.199206
69656	Pir	65.4339	1.59531	0.603212	2.64469	0.00817648	0.199206
12215	Bsg	629.987	1.10032	0.416435	2.64225	0.00823578	0.199206
68153	Gtf2e2	351.742	-1.06571	0.403108	-2.64374	0.00819944	0.199206
66689	Klhl28	566.933	-1.31484	0.497622	-2.64225	0.00823578	0.199206
17133	Maff	67.637	-1.62694	0.616339	-2.63967	0.00829858	0.200293
93761	Smarca1	1685.15	-0.79372	0.300947	-2.63741	0.00835417	0.201088
234309	Cbr4	84.5197	-1.44995	0.549876	-2.63687	0.00836744	0.201088
234086	Erich1	195.34	1.4047	0.532925	2.63583	0.00839325	0.201276
67801	Pllp	94.3727	1.62107	0.616343	2.63015	0.00853476	0.202073
20022	Polr2j	144.372	1.61887	0.615367	2.63074	0.00851992	0.202073
66921	Prpf38b	560.815	0.996687	0.378861	2.63075	0.0085197	0.202073
269878	Megf8	1707.58	0.81326	0.308851	2.63318	0.00845892	0.202073
66335	Atp6v1c1	546.06	-0.942429	0.358013	-2.63239	0.00847876	0.202073
68404	Nrn1	34.8639	-1.61074	0.612304	-2.63063	0.0085227	0.202073
228911	Tshz2	612.25	1.01777	0.387376	2.62735	0.00860533	0.20246
66205	Cd302	194.941	-1.26285	0.48042	-2.62863	0.00857296	0.20246
217692	Sipa1l1	80.2592	-1.58524	0.60333	-2.62748	0.00860211	0.20246
227541	Camk1d	12466	0.627324	0.238854	2.62639	0.00862955	0.202604
77045	Bcl7a	1567.42	0.861964	0.328559	2.62346	0.00870409	0.202655
209478	Tbc1d12	1302.47	-0.755941	0.287952	-2.62523	0.00865904	0.202655
14998	H2-DMa	359.549	-1.3912	0.530238	-2.62373	0.00869733	0.202655
70681	Abraxas1	240.565	-1.47636	0.562505	-2.62462	0.00867448	0.202655
78883	9630013K17Rik	31.069	1.54591	0.589789	2.62112	0.00876415	0.20363
17246	Mdm2	1458.38	-0.825745	0.315163	-2.62006	0.00879155	0.203844
16425	Itih2	141.089	1.5985	0.610863	2.61678	0.00887625	0.205382
14758	Gpm6b	239.334	1.44	0.550947	2.61368	0.00895727	0.206551
75444	Ccdc192	48.1479	-1.59688	0.611026	-2.61344	0.00896363	0.206551
170731	Mfn2	1421.38	0.773181	0.295966	2.6124	0.00899103	0.206757
117148	Necab2	178.729	1.59869	0.613311	2.60665	0.00914315	0.209824
75415	Arhgap12	955.91	1.20697	0.463495	2.60406	0.00921271	0.210129
72475	Ssbp3	1319.01	1.177	0.451752	2.60541	0.00917642	0.210129
28199	Dcaf11	517.195	0.933251	0.358341	2.60436	0.0092045	0.210129
78891	Scyl1	571.672	1.22233	0.4697	2.60237	0.00925828	0.210739
72649	Tmem209	177.865	1.32811	0.510704	2.60054	0.00930771	0.211434
11669	Aldh2	42.1087	-1.59872	0.61493	-2.59984	0.00932662	0.211435
107885	Mthfs	225.953	-1.19267	0.458996	-2.59842	0.00936526	0.211882
102637797	A330015K06Rik	28.009	1.52971	0.589046	2.59693	0.00940621	0.21235
229524	Msto1	500.575	1.51841	0.584842	2.59628	0.00942386	0.21235
270118	Maml2	27.6523	1.52438	0.588745	2.5892	0.00961984	0.216331
14456	Gas6	1473.94	0.823138	0.318076	2.58786	0.0096573	0.216738
72043	Sulf2	118.107	1.33139	0.515484	2.58279	0.00980053	0.219512
12211	Birc6	7338.06	-0.732164	0.283596	-2.58172	0.00983095	0.219754
414116	D630024D03Rik	164.774	-1.5212	0.589486	-2.58056	0.00986408	0.220055
22063	Trpc1	1116.43	-0.809296	0.313754	-2.5794	0.00989735	0.220359
74478	Snx29	3649.33	0.733356	0.284473	2.57795	0.0099389	0.220845
81799	C1qtnf3	49.5016	1.583	0.615169	2.57327	0.0100743	0.221592
217262	Abca9	117.328	1.57356	0.612376	2.5696	0.0101816	0.221592
18518	Igbp1	429.583	1.17092	0.455504	2.5706	0.0101521	0.221592
20979	Syt1	716.003	1.02662	0.399404	2.57039	0.0101585	0.221592
76491	Abhd14b	390.891	0.97798	0.380739	2.56864	0.01021	0.221592
77975	Tmem50b	865.752	-0.923013	0.359084	-2.57047	0.0101562	0.221592
235459	Gtf2a2	289.852	-1.09808	0.426595	-2.57405	0.0100516	0.221592
114896	Afg3l1	332.665	-1.1389	0.442105	-2.57608	0.00999274	0.221592
69368	Wdfy1	1427.12	-1.14221	0.444246	-2.57113	0.0101368	0.221592
239827	Pigz	174.284	-1.49819	0.582436	-2.57229	0.0101029	0.221592
77633	4930594C11Rik	32.5062	-1.50827	0.587091	-2.56905	0.0101977	0.221592
20324	Cavin2	29.0359	-1.5111	0.587464	-2.57224	0.0101042	0.221592
20168	Rtn3	129.786	1.4062	0.547731	2.56733	0.0102485	0.221998
320376	Bcorl1	366.627	1.26935	0.495032	2.56418	0.010342	0.22295
14050	Eya3	1592.52	-0.727976	0.284014	-2.56317	0.0103721	0.22295
19210	Ptdss1	1004.69	-0.855434	0.333717	-2.56335	0.0103667	0.22295
50753	Fbxo8	1873.52	-0.986574	0.384691	-2.56459	0.0103299	0.22295
72692	Hnrnpll	831.449	1.24662	0.486664	2.56157	0.01042	0.22355
20787	Srebf1	338.525	1.28908	0.503587	2.55979	0.0104734	0.224268
27984	Efhd2	231.284	1.56624	0.612534	2.55699	0.0105583	0.225654
264064	Cdk8	21959.1	0.736194	0.288332	2.55329	0.0106711	0.226337
17221	Cd46	989.223	-0.821824	0.321645	-2.55506	0.0106169	0.226337
320938	Tnpo3	1048.84	-1.05704	0.413964	-2.55347	0.0106657	0.226337
269959	Adamtsl3	204.529	-1.40006	0.548147	-2.55416	0.0106443	0.226337
231855	Ap5z1	1062.71	-1.48605	0.582235	-2.55232	0.0107007	0.226535
72556	Zfp566	27.9706	-1.49493	0.586515	-2.54884	0.0108082	0.22838
75736	Bcl2l12	27.083	1.56727	0.61547	2.54645	0.0108824	0.229514
68178	Cgnl1	91.6594	1.43505	0.56427	2.54319	0.0109845	0.230369
231659	Gcn1l1	850.087	-0.824916	0.324363	-2.54319	0.0109846	0.230369
218314	Zfp595	128.243	-1.36905	0.538299	-2.54328	0.0109817	0.230369
271036	Catsperb	134.375	-1.45218	0.571618	-2.54046	0.0110706	0.231737
72750	Fam117b	1406.46	0.754755	0.298084	2.53202	0.0113409	0.236071
328572	Ep300	2178.3	-0.682376	0.269494	-2.53206	0.0113395	0.236071
50995	Uba2	459.141	-1.3224	0.522247	-2.53212	0.0113374	0.236071
268857	Nlrc3	69.1194	1.55326	0.613841	2.53039	0.0113936	0.236728
17387	Mmp14	50.9806	1.55605	0.615184	2.5294	0.0114257	0.236957
13349	Ackr1	293.42	1.24618	0.493455	2.52541	0.0115562	0.238779
12367	Casp3	64.0831	-1.48253	0.586979	-2.5257	0.0115468	0.238779
225467	Pggt1b	1095.94	0.792413	0.313964	2.52389	0.0116063	0.239372
30057	Timm8b	77.403	-1.50256	0.596396	-2.51939	0.0117558	0.24201
77938	Fam53b	4260.99	0.658242	0.262011	2.51227	0.0119957	0.246458
68259	Ift80	1166.62	-0.923181	0.36765	-2.51103	0.0120379	0.246458
20445	St6galnac1	96.5594	-1.50946	0.601014	-2.51152	0.0120212	0.246458
12953	Cry2	40.4898	-1.46604	0.58406	-2.51009	0.01207	0.246663
50934	Slc7a8	2815.26	0.677527	0.270122	2.50822	0.012134	0.246716
21894	Tln1	681.631	-1.1072	0.441375	-2.50853	0.0121234	0.246716
665563	Mthfd2l	27.1692	-1.46653	0.584719	-2.50809	0.0121386	0.246716
58220	Pard6b	66.1595	-1.54202	0.615393	-2.50575	0.0122192	0.247904
213539	Bag2	75.707	1.53995	0.615276	2.50286	0.0123194	0.248279
227120	Plcl1	210.125	1.31709	0.526275	2.50266	0.0123264	0.248279
20957	Sycp1	6128.18	-0.667761	0.266757	-2.50326	0.0123057	0.248279
105522	Ankrd28	1166.13	-0.914624	0.36529	-2.50383	0.0122858	0.248279
246728	Oas2	271.407	1.27465	0.510259	2.49805	0.0124879	0.251081
100037278	Fam129c	26.3947	1.53318	0.614099	2.49664	0.0125377	0.25118
60532	Wtap	466.162	-1.13414	0.454189	-2.49707	0.0125224	0.25118
20352	Sema4b	371.604	1.23921	0.496666	2.49505	0.012594	0.251857
268934	Grm4	526.281	0.994477	0.399132	2.4916	0.0127169	0.253863
69399	1700025G04Rik	340.61	1.10061	0.442098	2.48953	0.0127913	0.254892
11419	Asic1	585.776	1.12505	0.452179	2.48807	0.012844	0.255391
71492	Bbs7	996.165	-0.974664	0.391814	-2.48757	0.0128619	0.255391
229211	Acad9	568.973	1.39921	0.563255	2.48416	0.0129858	0.25694
270201	Klhl18	922.189	0.7777	0.313038	2.48436	0.0129783	0.25694
71592	Pogk	302.751	1.11268	0.448041	2.48344	0.013012	0.257004
100041433	Zfp981	37.1951	-1.52576	0.614978	-2.481	0.0131013	0.258313
75608	Chmp4b	1347.96	0.804033	0.324181	2.4802	0.0131309	0.258442
71767	Tysnd1	264.276	1.42712	0.575582	2.47944	0.0131589	0.258538
19775	Xpr1	2450.53	1.16461	0.469986	2.47796	0.0132136	0.259158
76915	Mnd1	29.3464	1.5254	0.616409	2.47466	0.0133363	0.259799
107589	Mylk	98.7974	1.52505	0.616422	2.47403	0.0133598	0.259799
12153	Bmp1	21.5684	1.46221	0.591579	2.47171	0.0134467	0.259799
213006	Mfsd4a	1249.56	1.41436	0.57219	2.47184	0.0134419	0.259799
52563	Cdc23	792.65	1.04058	0.42058	2.47415	0.0133555	0.259799
66667	Hspbap1	1083.11	0.813408	0.329198	2.47087	0.0134783	0.259799
68059	Tm9sf2	1236.81	-0.720683	0.291649	-2.47106	0.0134714	0.259799
27354	Nbn	163.24	-1.30879	0.5296	-2.47129	0.0134627	0.259799
109785	Pgm3	149.526	-1.31471	0.531198	-2.47499	0.0133241	0.259799
76389	Ankrd36	40.4723	-1.52211	0.615444	-2.47318	0.0133916	0.259799
23959	Nt5e	507.773	-0.931513	0.377324	-2.46874	0.0135591	0.260908
69790	Med30	73.5537	-1.43481	0.581368	-2.468	0.0135872	0.260999
242662	Rims3	46.0633	1.49342	0.606333	2.46303	0.0137768	0.264189
54635	Pdgfc	578.907	1.07131	0.435152	2.46192	0.0138194	0.264553
100561	Slc15a4	226.522	1.21615	0.494238	2.46066	0.0138681	0.264626
14272	Fnta	351.383	-1.25439	0.510148	-2.45887	0.0139374	0.264626
18439	P2rx7	119.124	-1.43275	0.582425	-2.45998	0.0138944	0.264626
20509	Slc19a1	57.2741	-1.4436	0.587121	-2.45877	0.0139414	0.264626
544817	Arhgap27	102.674	-1.50968	0.613864	-2.45931	0.0139206	0.264626
67213	Cmtm6	491.851	-0.914706	0.37241	-2.45618	0.0140422	0.266088
13121	Cyp51	234.075	-1.39264	0.567421	-2.45433	0.0141147	0.26701
74504	Fam53a	496.372	1.19729	0.488077	2.45307	0.0141644	0.267049
210992	Lpcat1	203.639	-1.13828	0.463958	-2.45341	0.0141507	0.267049
75203	4930539N22Rik	249.612	1.45895	0.595452	2.45016	0.0142793	0.267862
68098	Rchy1	293.875	-1.14202	0.466071	-2.45032	0.0142729	0.267862
74168	Zdhhc16	164.014	-1.51034	0.616211	-2.45101	0.0142456	0.267862
72518	2610307P16Rik	128.051	1.50973	0.616415	2.44921	0.0143168	0.268117
74667	4930434J06Rik	43.6802	1.50523	0.61495	2.44772	0.0143763	0.268334
268880	Xxylt1	353.343	1.06922	0.436811	2.4478	0.0143733	0.268334
57754	Cend1	161.01	-1.2484	0.510438	-2.44574	0.0144555	0.268915
73968	4930444F02Rik	46.3305	-1.4205	0.580789	-2.4458	0.014453	0.268915
216440	Os9	433.597	0.944115	0.386164	2.44486	0.0144909	0.269127
26441	Psma4	927.792	-0.765889	0.313599	-2.44225	0.0145959	0.26946
207932	Urb1	514.175	-1.00979	0.413352	-2.44292	0.014569	0.26946
110006	Gusb	71.1459	-1.4072	0.575931	-2.44335	0.0145517	0.26946
22390	Wee1	123.082	-1.40747	0.576351	-2.44203	0.0146051	0.26946
215751	Ginm1	260.277	1.49925	0.614657	2.43917	0.0147212	0.270266
18987	Pou2f2	43.462	1.43565	0.588325	2.44024	0.0146776	0.270266
66609	Cryzl1	663.141	-1.08129	0.443224	-2.43959	0.0147038	0.270266
20603	Sms	426.243	-0.924626	0.3793	-2.43772	0.0147804	0.270909
21960	Tnr	329.721	1.25427	0.514657	2.43711	0.0148053	0.270923
16950	Loxl3	56.4515	1.47047	0.603926	2.43485	0.014898	0.271165
243867	Fbxo46	112.62	1.39448	0.573075	2.43333	0.0149608	0.271165
108841	Rdh13	675.965	1.0118	0.415822	2.43325	0.0149638	0.271165
53619	Blcap	839.145	0.923078	0.379067	2.43513	0.0148863	0.271165
26554	Cul3	1698.34	-0.883355	0.363014	-2.43339	0.0149582	0.271165
320933	D230017M19Rik	453.953	-1.35691	0.557427	-2.43424	0.014923	0.271165
68229	Spindoc	251.799	1.25641	0.516647	2.43185	0.0150221	0.271782
16601	Klf9	944.544	0.9099	0.37444	2.43003	0.0150975	0.272266
22019	Tpp2	969.413	-0.982853	0.404417	-2.4303	0.0150865	0.272266
72392	Tmem175	630.182	-0.824944	0.339611	-2.42909	0.015137	0.272539
21814	Tgfbr3	814.445	0.820917	0.3382	2.42731	0.0152112	0.272997
102545	Cmtm7	142.135	-1.36428	0.561981	-2.42763	0.015198	0.272997
69918	2610020C07Rik	146.026	-1.4008	0.577378	-2.42614	0.0152603	0.27344
193838	Eme2	223.411	1.08945	0.449484	2.42378	0.0153597	0.274782
268480	Rapgefl1	556.523	1.15312	0.475898	2.42304	0.0153912	0.274907
74165	Fbxl22	69.6279	1.48003	0.61123	2.42139	0.0154611	0.275715
67222	Srfbp1	327.345	-0.972003	0.401782	-2.41923	0.0155535	0.276921
75619	Fastkd2	149.979	-1.37751	0.569694	-2.41798	0.0156069	0.277431
109215	Lncbate1	95.0384	1.41107	0.583983	2.41628	0.0156799	0.27798
26433	Plod3	223.366	1.3371	0.553569	2.41542	0.015717	0.27798
140742	Sesn1	1853.34	-1.03134	0.426916	-2.4158	0.0157007	0.27798
231279	Guf1	223.801	-1.24742	0.516539	-2.41496	0.0157371	0.27798
19265	Ptprcap	51.4195	1.41363	0.585665	2.41372	0.0157908	0.278238
56378	Arpc3	133.785	1.30384	0.540356	2.41293	0.0158247	0.278238
433667	Ankrd13c	1319.27	-0.79037	0.327561	-2.41289	0.0158264	0.278238
105446	Gmpr2	107.056	-1.2741	0.528164	-2.41233	0.0158511	0.278238
69408	Dnajc17	387.402	1.0534	0.4369	2.41108	0.0159052	0.278752
56216	Stx1b	273.749	1.01324	0.420833	2.4077	0.0160533	0.280908
20220	Sap18	125.09	-1.35353	0.562486	-2.40634	0.0161133	0.281518
228787	Xkr7	223.719	1.10606	0.46001	2.40441	0.0161984	0.281519
213053	Slc39a14	1782.46	0.841691	0.350017	2.40472	0.0161851	0.281519
72180	Zfp661	87.6274	-1.39909	0.581968	-2.40406	0.0162139	0.281519
12617	Cenpc1	63.2438	-1.39959	0.581832	-2.40549	0.0161507	0.281519
68366	Tmem129	141.936	1.33392	0.556196	2.39828	0.0164722	0.283453
69305	Dcps	586.294	1.20661	0.503052	2.39858	0.0164587	0.283453
228998	Arfgap1	574.524	0.837776	0.349098	2.39983	0.0164028	0.283453
63859	Impg1	204.063	-1.15779	0.482778	-2.39819	0.0164762	0.283453
66985	Rassf7	23.0103	-1.41117	0.587927	-2.40025	0.0163839	0.283453
78895	Pus7l	77.5101	-1.46926	0.61266	-2.39817	0.0164772	0.283453
212772	Arl14ep	274.198	-1.34984	0.563005	-2.39756	0.0165046	0.283489
71949	Cers5	970.918	0.755484	0.315322	2.39591	0.0165792	0.284214
399568	BC052040	1022.68	-0.745061	0.311097	-2.39494	0.0166229	0.284214
268980	Strn	1152.71	-0.823451	0.343807	-2.39509	0.0166161	0.284214
98363	Efhd1	420.122	0.97998	0.409917	2.39068	0.0168172	0.286659
216846	Cntrob	273.941	-1.30869	0.547407	-2.39071	0.0168158	0.286659
224020	Pi4ka	6102.64	0.649962	0.272168	2.38809	0.0169362	0.288234
67097	Rps10	65.6426	-1.43331	0.600327	-2.38755	0.016961	0.288234
67976	Trabd	215.819	1.40484	0.588586	2.38681	0.0169953	0.28838
230837	Asap3	39.4395	1.45339	0.609447	2.38477	0.0170897	0.289543
268420	Alkbh5	243.979	-1.01084	0.424462	-2.38145	0.0172446	0.289974
213311	Fbxl21	296.253	-1.06898	0.448656	-2.38263	0.0171892	0.289974
223723	Ttll12	132.998	-1.31603	0.552449	-2.38217	0.017211	0.289974
65970	Lima1	220.267	-1.33715	0.561368	-2.38196	0.017221	0.289974
242521	Klhl9	43.4009	-1.46895	0.616428	-2.383	0.0171721	0.289974
14702	Gng2	1016.04	0.800576	0.336489	2.3792	0.0173502	0.29099
237221	Gemin8	39.1563	-1.46066	0.613965	-2.37906	0.017357	0.29099
216033	Ctnna3	539.48	1.15476	0.485882	2.37663	0.0174716	0.292229
258571	Olfr1033	171.975	-1.16856	0.491738	-2.37639	0.0174831	0.292229
101100	Ttll3	97.8392	1.4088	0.593006	2.37569	0.0175161	0.292344
102639404	Gm26839	47.5069	1.4585	0.614911	2.37189	0.0176975	0.293011
232875	Zscan18	122.671	1.25678	0.529626	2.37296	0.0176462	0.293011
57751	Rnf25	507.661	0.884933	0.373163	2.37144	0.017719	0.293011
103012	Firre	1648.36	-0.695347	0.293269	-2.37102	0.0177392	0.293011
72745	Tmem161b	1539.87	-0.763618	0.321726	-2.3735	0.0176204	0.293011
224598	Zfp758	129.531	-1.32336	0.557967	-2.37176	0.0177036	0.293011
15384	Hnrnpab	155.161	-1.46242	0.616261	-2.37306	0.0176414	0.293011
19893	Rpgr	1124.92	-0.705337	0.297659	-2.36961	0.0178067	0.293692
240444	Kcng2	1672.87	0.791256	0.334191	2.36768	0.0179001	0.294798
57437	Golga7	258.9	1.25973	0.532296	2.36659	0.0179527	0.295232
231630	Ficd	89.7408	1.45455	0.614841	2.36574	0.017994	0.295477
66587	Fastk	690.822	1.37776	0.583297	2.36203	0.0181753	0.296619
22670	Trim26	476.843	1.01932	0.431519	2.36216	0.018169	0.296619
330222	Sdk1	6744.84	0.680136	0.287966	2.36186	0.0181834	0.296619
78103	8430431K14Rik	1158.7	-1.1021	0.466676	-2.3616	0.018196	0.296619
18377	Omg	104.017	-1.43659	0.607833	-2.36347	0.0181049	0.296619
18667	Pgr	1082.89	-0.719348	0.304689	-2.36092	0.0182296	0.296734
58180	Hic2	324.259	-0.948011	0.401748	-2.35972	0.018289	0.296838
217149	Cisd3	32.9385	-1.45434	0.616221	-2.36009	0.0182707	0.296838
78257	Lrrc9	239.546	1.36751	0.579734	2.35886	0.0183311	0.297091
207728	Pde2a	3696.3	0.614658	0.26086	2.35628	0.0184591	0.297948
100041621	Gm3435	925.154	-1.18596	0.503198	-2.35685	0.0184307	0.297948
76501	Commd9	122.895	-1.3155	0.558444	-2.35565	0.0184904	0.297948
474156	Zbtb9	306.587	-1.42631	0.605369	-2.3561	0.018468	0.297948
67712	Slc25a37	915.786	0.74041	0.314387	2.35509	0.0185182	0.297967
215476	Prr14l	2936.77	0.638117	0.27112	2.35363	0.018591	0.298709
23856	Dido1	703.169	-0.79904	0.339699	-2.3522	0.0186628	0.299434
319535	Zfp182	739.998	-1.17049	0.497799	-2.35132	0.0187067	0.299709
17929	Myom1	223.297	1.18682	0.505018	2.35005	0.0187711	0.299883
53382	Txnl1	1499.56	-0.74353	0.316322	-2.35055	0.0187457	0.299883
74025	Nphp3	961.127	-1.20138	0.511708	-2.34779	0.0188851	0.301274
232236	Ccdc174	420.576	-0.978885	0.417139	-2.34666	0.0189423	0.301757
71983	Tmco6	60.2516	-1.40273	0.598505	-2.34371	0.0190928	0.303721
14976	Pfdn6	47.5362	1.39437	0.59534	2.34214	0.0191733	0.30457
76367	Trp53rkb	170.792	1.38701	0.593063	2.33872	0.0193501	0.306943
229474	Fhdc1	39.9111	1.43178	0.613082	2.33538	0.0195238	0.30926
268747	Carmil3	210.36	1.27847	0.547704	2.33424	0.0195833	0.309764
243274	Tmem132d	7104.74	0.676837	0.29015	2.33271	0.0196634	0.3102
67186	Rplp2	51.0864	-1.42956	0.612845	-2.33266	0.0196662	0.3102
240216	E230025N22Rik	21.6647	1.36192	0.584262	2.33101	0.0197526	0.311034
80987	Nckipsd	526.693	1.29133	0.554245	2.32988	0.0198123	0.311034
381260	Gm973	154.959	1.18947	0.51067	2.32923	0.0198471	0.311034
73490	Mipol1	3724.08	-0.726449	0.311878	-2.32927	0.0198445	0.311034
68770	Phtf2	5807.52	-0.853777	0.366582	-2.32902	0.019858	0.311034
80708	Pacsin3	155.677	1.21613	0.522411	2.32793	0.0199161	0.311509
227835	Gtdc1	4320.11	-0.98564	0.423503	-2.32735	0.0199466	0.311551
20274	Scn9a	1185.46	1.0562	0.454529	2.32373	0.0201398	0.3135
64436	Inpp5e	1037.83	0.737918	0.317502	2.32413	0.0201183	0.3135
71989	Rpusd4	40.2979	-1.42315	0.612517	-2.32344	0.0201553	0.3135
22036	Traip	48.1126	1.41859	0.610832	2.32239	0.020212	0.313945
320633	Zbtb26	34.1635	1.33472	0.574974	2.32136	0.0202673	0.314368
68087	Dcakd	421.145	1.3089	0.564258	2.31968	0.020358	0.315337
75698	Shld2	490.744	1.10486	0.476434	2.31902	0.020394	0.315459
12293	Cacna2d1	153.607	1.16444	0.502255	2.31842	0.0204265	0.315526
171508	Creld1	406.982	1.22861	0.530325	2.31672	0.020519	0.316148
56738	Mocs1	466.175	-0.883026	0.381167	-2.31664	0.0205232	0.316148
613264	1810020O05Rik	94.4498	-1.40515	0.606834	-2.31555	0.0205831	0.316634
319800	Slc22a30	621.072	-0.951575	0.411083	-2.3148	0.0206239	0.316827
71226	4933433G19Rik	243.453	-1.07285	0.463609	-2.31412	0.0206613	0.316967
20016	Polr1c	94.7908	1.36449	0.589778	2.31356	0.0206919	0.317002
104010	Cdh22	69.7086	1.41846	0.613538	2.31193	0.0207813	0.317937
432713	Gm5441	163.249	1.38047	0.597501	2.3104	0.0208658	0.318387
72881	Zdhhc4	230.067	1.16869	0.505844	2.31037	0.0208676	0.318387
52822	Rufy3	2676.52	-0.613697	0.265924	-2.30779	0.0210108	0.3197
70005	Znf41-ps	1094.2	-0.965345	0.41828	-2.30789	0.0210052	0.3197
252972	Tpcn1	470.746	1.02934	0.44632	2.30627	0.0210954	0.320118
403187	Opa3	240.619	-1.14266	0.495417	-2.30645	0.0210853	0.320118
217219	Fam171a2	103.265	1.25878	0.546063	2.30519	0.0211558	0.320151
67442	Retsat	98.3883	1.24931	0.541941	2.30524	0.021153	0.320151
212073	Syne3	72.5139	-1.35733	0.588939	-2.3047	0.0211833	0.320151
210710	Gab3	163.043	-1.15764	0.502405	-2.30419	0.0212121	0.320154
68528	Smim6	24.2453	1.32282	0.574643	2.30199	0.0213358	0.321587
100306943	Scarna13	171.876	1.10344	0.479695	2.3003	0.0214312	0.3222
21423	Tcf3	461.488	-1.23173	0.535476	-2.30025	0.0214339	0.3222
241612	Slc5a12	75.1304	1.39609	0.607633	2.29758	0.0215856	0.324045
12290	Cacna1e	256.607	1.33719	0.582255	2.29657	0.0216433	0.324475
22340	Vegfb	127.285	1.34722	0.586898	2.2955	0.0217048	0.324962
55979	Agpat1	263.498	1.15301	0.5025	2.29454	0.0217593	0.325343
70917	4921509O07Rik	58.0663	-1.38272	0.603052	-2.29286	0.0218559	0.326353
94217	Lrp1b	44051.2	1.17315	0.512153	2.29063	0.021985	0.327602
225131	Wac	1894.26	-0.739572	0.322901	-2.2904	0.0219981	0.327602
17761	Map7	786.135	1.3103	0.572267	2.28966	0.0220409	0.327803
14118	Fbn1	1201.53	1.02583	0.448156	2.28901	0.0220788	0.327931
226849	Ppp2r5a	512.126	-0.841217	0.367593	-2.28845	0.0221115	0.327982
622459	Gm12216	160.163	1.23541	0.540633	2.28513	0.0223055	0.330033
67582	Slc25a26	1122.26	-1.01683	0.444987	-2.28507	0.0223087	0.330033
269870	Zfp446	216.659	1.06453	0.466159	2.28362	0.0223939	0.330766
56389	Stx5a	727.181	-0.748084	0.327644	-2.28322	0.0224173	0.330766
329735	4933431E20Rik	113.536	-1.2588	0.551458	-2.28267	0.0224498	0.33081
73713	Rbm20	593.604	1.39737	0.612945	2.27976	0.0226218	0.331262
338362	Ust	228.261	1.06258	0.466012	2.28015	0.0225989	0.331262
71389	Chd6	4279.81	0.784915	0.344387	2.27917	0.0226571	0.331262
20616	Snap91	1755.15	-1.24614	0.546741	-2.27922	0.0226541	0.331262
230234	Fam206a	165.842	-1.34034	0.5878	-2.28026	0.0225922	0.331262
83924	Gpr137b	158.174	-1.35298	0.593631	-2.27915	0.022658	0.331262
27411	Slc14a2	158.401	1.40103	0.614972	2.2782	0.0227145	0.331656
110173	Manba	53.901	-1.38881	0.609798	-2.27749	0.022757	0.331843
319830	1500004A13Rik	999.629	-0.918711	0.40348	-2.27697	0.0227883	0.331867
18226	Nup62	213.402	1.35446	0.595378	2.27496	0.0229086	0.331914
19698	Relb	79.3486	1.2907	0.567199	2.27557	0.0228719	0.331914
66971	Cdk5rap1	254.519	-1.12959	0.496312	-2.27597	0.0228479	0.331914
69964	2810403D21Rik	89.2431	-1.39137	0.611608	-2.27493	0.0229101	0.331914
13429	Dnm1	5005.6	0.700102	0.30807	2.27254	0.0230538	0.333453
319615	Zfp944	183.764	-1.04606	0.460378	-2.27218	0.0230758	0.333453
214952	Rhot2	565.226	1.0286	0.452896	2.27116	0.023137	0.333906
320226	Ccdc171	278.354	-1.11585	0.491674	-2.26949	0.0232383	0.334937
66167	Tma7	61.0712	-1.36304	0.600753	-2.26888	0.0232757	0.335044
19697	Rela	171.506	1.2461	0.549508	2.26767	0.0233494	0.335079
626848	Zfp971	534.501	0.890743	0.392854	2.26737	0.0233679	0.335079
66889	Rnf128	747.152	-0.785258	0.346254	-2.26787	0.0233371	0.335079
50768	Dlc1	3284.45	-0.873395	0.385311	-2.26673	0.0234069	0.335209
75782	Lca5	216.962	0.997992	0.441185	2.26207	0.0236931	0.338875
56531	Ylpm1	3348.95	0.621788	0.275072	2.26046	0.0237929	0.339868
18710	Pik3r3	771.293	-0.769023	0.340589	-2.25792	0.0239506	0.34094
65246	Xpo7	1758.97	-0.893306	0.395487	-2.25875	0.0238991	0.34094
18983	Cnot7	665.711	-1.12463	0.498114	-2.25778	0.0239593	0.34094
108909	Aida	291.48	-1.14145	0.505718	-2.25709	0.0240027	0.341124
233865	D430042O09Rik	1226.08	0.858515	0.380515	2.25619	0.0240586	0.341486
252876	Gin1	175.649	-1.21856	0.540244	-2.25557	0.0240975	0.341606
11423	Ache	158.318	1.38909	0.616005	2.255	0.0241334	0.341682
15982	Ifrd1	336.78	-0.953972	0.423229	-2.25403	0.0241943	0.342111
59046	Arpp19	453.158	-0.915546	0.406408	-2.25278	0.0242731	0.342793
235461	Mindy2	2026.91	0.609151	0.270548	2.25154	0.0243511	0.34346
230249	Ecpas	391.508	1.27277	0.565439	2.25094	0.0243896	0.343571
66591	Mad2l1bp	39.2529	1.38461	0.615804	2.24846	0.0245468	0.344476
54638	Ccdc22	270.194	0.955425	0.425079	2.24764	0.0245991	0.344476
22215	Ube3a	9733.53	-0.61675	0.274445	-2.24726	0.0246235	0.344476
17350	Mlh1	560.369	-0.785359	0.349341	-2.24811	0.024569	0.344476
228005	Ppig	749.825	-0.958724	0.426663	-2.24703	0.0246384	0.344476
100504360	D730003I15Rik	213.014	-1.38574	0.616064	-2.24934	0.0244908	0.344476
73738	Haus7	37.777	1.38022	0.615176	2.24361	0.0248575	0.345105
170735	Arr3	35.925	1.37738	0.613794	2.24404	0.0248298	0.345105
66358	Adprm	217.186	1.1795	0.525381	2.24503	0.0247662	0.345105
213491	Szrd1	1007.11	1.02902	0.458481	2.2444	0.0248064	0.345105
227446	Relch	2148.1	-0.69817	0.311271	-2.24296	0.0248991	0.345105
68099	Fam92a	462.955	-1.1932	0.53191	-2.24324	0.0248812	0.345105
52036	Ppp6r3	159.379	-1.2778	0.569306	-2.24449	0.0248007	0.345105
16434	Itpa	281.226	1.06742	0.476031	2.24234	0.0249393	0.345235
212168	Zswim4	175.464	1.24369	0.554971	2.241	0.025026	0.345509
381353	Ajm1	990.286	1.06899	0.4772	2.24013	0.0250825	0.345509
246154	Vasn	382.595	1.03575	0.462319	2.24034	0.0250691	0.345509
246782	Atpaf2	539.496	-0.995956	0.444445	-2.2409	0.0250326	0.345509
69890	Zfp219	876.167	0.721724	0.322355	2.23891	0.0251616	0.346173
109082	Fbxw17	287.749	-1.15298	0.515091	-2.23841	0.0251945	0.346201
28081	Fam104a	337.539	1.04568	0.46799	2.2344	0.0254565	0.3464
67943	Mesd	214.011	1.02064	0.456743	2.23461	0.0254429	0.3464
215436	Slc35e3	248.886	0.944323	0.422534	2.2349	0.0254237	0.3464
192119	Dicer1	1576.36	0.876445	0.391832	2.23679	0.0253003	0.3464
13191	Dctn1	1122.88	0.6695	0.299422	2.23597	0.0253535	0.3464
59009	Sh3rf1	630.51	-0.836735	0.374413	-2.23479	0.0254312	0.3464
109624	Cald1	45.1169	-1.36553	0.610569	-2.23649	0.0253198	0.3464
69064	Fuom	111.248	-1.3763	0.615668	-2.23546	0.0253872	0.3464
68565	Mrps18a	313.107	1.03322	0.462579	2.23362	0.0255083	0.346683
75476	1700010I02Rik	82.9297	1.27846	0.572699	2.23235	0.0255921	0.346981
71096	Sntg1	3906.11	-0.584704	0.261917	-2.2324	0.0255884	0.346981
56517	Slc22a21	60.4044	1.36312	0.612311	2.22619	0.0260014	0.348387
14787	Rhpn1	58.3717	1.35165	0.607648	2.2244	0.0261218	0.348387
224129	Adcy5	122.296	1.33434	0.598792	2.22839	0.0258546	0.348387
20775	Sqle	189.328	1.31722	0.593569	2.21915	0.0264764	0.348387
67685	Dyx1c1	88.668	1.28275	0.577192	2.22241	0.0262559	0.348387
93881	Pcdhb10	29.6709	1.26788	0.569522	2.22622	0.0259996	0.348387
100503636	1700123M08Rik	148.148	1.26015	0.567048	2.2223	0.026263	0.348387
66394	Nosip	356.089	1.25057	0.563466	2.21942	0.0264581	0.348387
77041	Arsk	212.058	1.23129	0.553998	2.22256	0.0262455	0.348387
12807	Hps3	826.593	1.10871	0.499666	2.2189	0.0264938	0.348387
211739	Vstm2a	219.575	1.05635	0.475849	2.21993	0.0264233	0.348387
328035	Fads6	527.337	0.94706	0.426512	2.22047	0.0263866	0.348387
17391	Mmp24	4374.79	0.900239	0.404622	2.22489	0.0260886	0.348387
11492	Adam19	1402.16	0.755347	0.338791	2.22954	0.025778	0.348387
239170	Fam160b2	825.98	0.736843	0.332045	2.2191	0.0264798	0.348387
99712	Cept1	1156.78	-0.669249	0.300399	-2.22787	0.0258895	0.348387
102502	Pls1	731.837	-0.835096	0.375986	-2.22109	0.0263451	0.348387
75745	Rian	1561.21	-1.03459	0.465931	-2.22048	0.026386	0.348387
54195	Gucy1b1	564.537	-1.0394	0.468442	-2.21885	0.0264968	0.348387
434377	Zfp560	168.221	-1.17716	0.52964	-2.22257	0.0262446	0.348387
20655	Sod1	117.639	-1.18367	0.532888	-2.22123	0.0263352	0.348387
226162	Dpcd	288.272	-1.20577	0.542303	-2.22343	0.026187	0.348387
102639882	1700016K05Rik	206.448	-1.33033	0.599588	-2.21874	0.0265047	0.348387
11807	Apoa2	40.8713	-1.34232	0.603751	-2.22331	0.0261952	0.348387
73914	Irak3	32.8141	-1.35241	0.608699	-2.2218	0.0262967	0.348387
76937	2810429I04Rik	48.3232	-1.3594	0.610002	-2.22852	0.0258462	0.348387
21646	Tcte2	285.824	0.901669	0.406514	2.21805	0.0265513	0.348591
56209	Gde1	730.882	0.904601	0.408098	2.21663	0.0266484	0.349429
64685	Nmi	23.6612	-1.31734	0.594413	-2.2162	0.0266776	0.349429
56218	Patz1	398.528	1.35696	0.612423	2.21572	0.0267105	0.349452
13494	Drg1	195.123	1.12246	0.507016	2.21387	0.026838	0.349545
70999	Naa40	1378.35	0.638617	0.288353	2.21471	0.0267803	0.349545
76628	1700112J16Rik	74.7195	-1.2868	0.581263	-2.2138	0.0268424	0.349545
59030	Mkks	133.12	-1.35891	0.613543	-2.21486	0.0267697	0.349545
320473	Heatr5b	1050.29	1.20614	0.545346	2.2117	0.0269876	0.350285
11305	Abca2	801.07	0.840891	0.380135	2.21208	0.0269609	0.350285
68112	Entr1	533.184	-0.82499	0.373026	-2.21162	0.0269931	0.350285
13684	Eif4e	746.221	-0.817083	0.369836	-2.20931	0.0271528	0.351542
59040	Rhot1	1808.01	-0.831028	0.376122	-2.20947	0.0271422	0.351542
233871	Atxn2l	1450.45	0.699407	0.316715	2.20832	0.0272223	0.352035
66306	Fam53c	549.524	-1.11247	0.504488	-2.20515	0.0274438	0.354491
21400	Tcea2	176.811	1.10163	0.500322	2.20184	0.0276764	0.356593
21813	Tgfbr2	242.006	1.08245	0.49169	2.20148	0.0277021	0.356593
67393	Cxxc5	781.439	-1.11658	0.507055	-2.20209	0.0276586	0.356593
230598	Nrd1	2645.76	-0.763285	0.346807	-2.20089	0.0277436	0.356718
78749	Filip1l	11746.4	0.687663	0.312722	2.19896	0.027881	0.357253
75216	Cep128	656.884	-0.765731	0.3481	-2.19975	0.0278248	0.357253
75627	Snapc1	217.203	-1.01691	0.462405	-2.19917	0.0278657	0.357253
70465	Wdr77	193.236	1.10482	0.502713	2.19772	0.0279694	0.357976
211347	Pank3	382.563	-1.04877	0.477369	-2.19698	0.028022	0.35824
74763	Naa60	167.208	-1.22155	0.556216	-2.19617	0.0280794	0.358565
69562	Cdk13	2935.68	-0.601957	0.27426	-2.19484	0.0281748	0.358964
100502841	Epg5	1803.12	-0.705951	0.321604	-2.19509	0.028157	0.358964
108912	Cdca2	176.429	1.17977	0.53782	2.19362	0.0282626	0.35928
71063	Zfp597	178.231	-1.33719	0.609584	-2.19361	0.0282637	0.35928
72393	Faim2	1408.06	0.807703	0.368371	2.19263	0.0283337	0.359579
100177	Zmym6	1005.13	0.733269	0.334474	2.19231	0.0283573	0.359579
171469	Gpr37l1	238.045	-1.08871	0.496688	-2.19194	0.0283836	0.359579
432442	Akap7	629.159	-1.02024	0.465692	-2.1908	0.0284661	0.360216
211383	Amer3	51.882	1.31681	0.601421	2.18949	0.028561	0.36101
71361	Aifm2	54.1634	1.33613	0.611312	2.18568	0.0288391	0.362047
16826	Ldb2	31.5609	1.33281	0.6104	2.1835	0.0289987	0.362047
381059	Gm1604b	51.4812	1.2967	0.593282	2.18564	0.0288416	0.362047
69269	Scnm1	167.686	1.24709	0.570645	2.1854	0.0288598	0.362047
13176	Dcc	183.801	1.24579	0.570545	2.18352	0.0289977	0.362047
66366	Ergic3	305.534	1.09438	0.500299	2.18745	0.0287098	0.362047
434353	A330074K22Rik	1050.1	1.08675	0.497627	2.18386	0.0289723	0.362047
219022	Ttc5	589.722	1.02885	0.470873	2.18498	0.0288901	0.362047
68603	Pmvk	123.845	-1.19247	0.545574	-2.18572	0.0288359	0.362047
75801	4930447C04Rik	100.314	-1.32679	0.607397	-2.18438	0.0289343	0.362047
73515	Nell1os	631.607	-1.348	0.616214	-2.18754	0.0287029	0.362047
24001	Tiam2	1990.67	-0.741854	0.34007	-2.18148	0.0291483	0.362986
53331	Stx7	465.117	-0.822132	0.376999	-2.18073	0.0292035	0.362986
69554	Klhdc2	406.44	-0.846999	0.388341	-2.18107	0.029178	0.362986
108645	Mat2b	264.803	-1.26442	0.579645	-2.18136	0.0291567	0.362986
11785	Apbb1	456.35	1.21901	0.559624	2.17827	0.0293858	0.363236
100039707	Mthfsl	202.144	1.2093	0.554984	2.17898	0.0293335	0.363236
15568	Elavl1	947.594	0.826026	0.379082	2.17901	0.0293307	0.363236
241944	D3Ertd254e	106.048	-1.21858	0.559424	-2.17828	0.0293851	0.363236
71461	Ptk7	32.7614	-1.34346	0.616453	-2.17933	0.0293068	0.363236
71746	Rgl3	106.697	1.31869	0.606171	2.17544	0.0295972	0.364664
20358	Sema6a	432.156	1.25006	0.574655	2.17533	0.0296055	0.364664
75710	Rbm12	184.014	1.20962	0.555916	2.1759	0.0295624	0.364664
227545	Proser2	146.048	1.0852	0.498949	2.17498	0.0296316	0.364664
19267	Ptpre	5763.24	0.600699	0.276378	2.17347	0.0297449	0.364855
207921	Fam228b	329.324	-0.907099	0.417314	-2.17366	0.0297307	0.364855
72368	Borcs8	105.228	-1.20031	0.552122	-2.174	0.029705	0.364855
18795	Plcb1	23127.2	0.55862	0.257239	2.1716	0.0298859	0.365519
104263	Kdm3a	527.552	-0.920651	0.423862	-2.17206	0.0298515	0.365519
21780	Tfam	100.094	-1.20336	0.554285	-2.17102	0.0299295	0.365519
57782	Rbak	96.5307	-1.33853	0.616437	-2.1714	0.0299008	0.365519
21770	Ppp2r5d	451.703	1.21689	0.560741	2.17015	0.0299953	0.365583
20688	Sp4	884.955	-0.923052	0.425352	-2.17009	0.0300001	0.365583
17524	Mpp1	146.615	-1.2542	0.578161	-2.16929	0.030061	0.365927
27049	Etv3	160.235	1.27184	0.586771	2.16753	0.0301948	0.367157
71712	Dram1	52.2165	1.32254	0.611774	2.16182	0.0306324	0.371709
30839	Fbxw5	642.628	0.96212	0.44506	2.16177	0.0306356	0.371709
106869	Tnfaip8	133.289	1.27272	0.589463	2.15912	0.0308408	0.371775
76441	Daam2	260.247	1.17831	0.54592	2.1584	0.0308969	0.371775
74206	Sipa1l3	650.084	1.13446	0.525646	2.15822	0.0309104	0.371775
216161	Sbno2	506.524	1.0397	0.481079	2.16118	0.0306818	0.371775
12727	Clcn4	299.855	0.932806	0.432285	2.15785	0.0309398	0.371775
11307	Abcg1	721.716	-0.833417	0.385957	-2.15935	0.0308228	0.371775
19696	Rel	265.663	-1.10519	0.511544	-2.16049	0.0307347	0.371775
381259	Tmem237	97.1006	-1.19633	0.554102	-2.15904	0.0308468	0.371775
67767	Jagn1	95.7789	-1.24506	0.576807	-2.15854	0.0308858	0.371775
57340	Jph3	49.6097	1.32314	0.613833	2.15554	0.0311196	0.371911
74376	Myo18b	129.892	1.19921	0.556548	2.15474	0.0311825	0.371911
66049	Rogdi	1161.82	0.973924	0.452242	2.15355	0.0312757	0.371911
66950	Tmem206	380.117	0.867643	0.402967	2.15314	0.0313078	0.371911
75209	Sv2c	6436.06	0.724501	0.336293	2.15437	0.0312111	0.371911
331401	Thoc2	2596.45	-0.595912	0.276708	-2.15358	0.0312732	0.371911
11428	Aco1	766.948	-0.778934	0.361548	-2.15444	0.0312058	0.371911
11777	Ap3s1	693.878	-0.810556	0.376412	-2.15337	0.0312894	0.371911
18771	Pknox1	387.879	-1.00821	0.468152	-2.15359	0.0312726	0.371911
73420	Ccsap	318.673	-1.07206	0.497474	-2.155	0.0311615	0.371911
57316	C1d	65.0647	-1.28188	0.595386	-2.15303	0.0313163	0.371911
320878	Mical2	1296.31	1.03166	0.479522	2.15144	0.0314413	0.372609
70930	Nol8	71.6236	-1.2674	0.589095	-2.15144	0.0314417	0.372609
19654	Rbm6	5613.91	-0.634143	0.294851	-2.15072	0.031498	0.372881
432582	Ccdc92b	401.406	0.823896	0.383236	2.14984	0.0315677	0.373312
68055	Atp5s	350.276	-1.05776	0.492136	-2.14932	0.0316091	0.373408
70361	Lman1	345.634	-1.07788	0.501639	-2.14872	0.0316568	0.373577
67876	Coq10b	119.739	-1.2595	0.586304	-2.1482	0.0316975	0.373663
75467	Stpg4	43.1521	1.30302	0.606759	2.1475	0.0317533	0.373736
231151	Tada2b	73.9425	1.29035	0.601743	2.14436	0.032004	0.373736
229722	5330417C22Rik	777.43	0.908143	0.423421	2.14477	0.0319709	0.373736
74103	Nebl	481.779	0.846591	0.39467	2.14506	0.031948	0.373736
208117	Aph1b	551.608	-0.973115	0.453254	-2.14695	0.0317972	0.373736
74919	Slc35f6	110.944	-1.24176	0.578839	-2.14526	0.0319319	0.373736
626049	Gm20753	41.1725	-1.25574	0.585331	-2.14534	0.0319255	0.373736
238021	Fscn2	44.6378	-1.30987	0.610639	-2.14508	0.0319461	0.373736
66199	Commd4	70.5168	-1.31644	0.61321	-2.1468	0.0318093	0.373736
67073	Pi4k2b	115.656	1.31802	0.615328	2.14198	0.0321952	0.374407
11979	Atp7b	103.791	1.14522	0.534622	2.1421	0.0321853	0.374407
14447	Gapdhs	562.723	1.05697	0.493196	2.14311	0.0321042	0.374407
217031	Tada2a	1099.46	-0.691463	0.322737	-2.1425	0.0321535	0.374407
70574	Cpm	79.6769	1.25509	0.586315	2.14065	0.0323023	0.375263
232947	Ppp1r37	688.48	0.770937	0.360262	2.13993	0.0323601	0.375544
75524	Tex48	45.4079	-1.29729	0.606397	-2.13935	0.0324075	0.375706
320739	6530403H02Rik	155.411	1.28525	0.600949	2.1387	0.0324599	0.375924
27221	Chaf1a	67.8108	1.22997	0.575441	2.13743	0.0325628	0.376726
12503	Cd247	530.168	0.878933	0.411396	2.13647	0.0326414	0.377246
22295	Cdh23	61.4555	1.26748	0.593546	2.13544	0.0327252	0.377435
219150	Hmbox1	1753.24	-0.638038	0.298748	-2.1357	0.0327036	0.377435
76454	Fbxo31	334.265	0.903137	0.423106	2.13454	0.0327984	0.377502
66964	Golt1b	571.977	-0.911176	0.426821	-2.13479	0.0327778	0.377502
13433	Dnmt1	545.836	1.27587	0.598107	2.13318	0.0329098	0.37762
13631	Eef2k	158.678	1.07162	0.502349	2.13322	0.0329064	0.37762
67500	Ccar1	7217.65	-0.583259	0.273344	-2.13379	0.0328601	0.37762
104457	0610010K14Rik	43.163	-1.31212	0.61574	-2.13096	0.0330923	0.379325
66722	Spag16	424.778	1.22135	0.573688	2.12895	0.0332586	0.380841
20656	Sod2	1420.63	0.90524	0.425618	2.12688	0.0334297	0.38241
218397	Rasa1	1133.87	-0.806236	0.37937	-2.1252	0.0335701	0.383624
75084	4930511M06Rik	44.3636	1.30139	0.612967	2.12311	0.0337449	0.385229
72469	Plcd3	948.535	-0.754766	0.355711	-2.12185	0.0338503	0.386038
56031	Ppie	177.963	1.23444	0.582675	2.11857	0.0341266	0.386044
320736	Vstm4	89.61	1.20925	0.570727	2.11879	0.0341079	0.386044
233552	Gdpd5	2339.91	1.04189	0.491546	2.11962	0.0340377	0.386044
407243	Tmem189	759.91	0.847703	0.399753	2.12057	0.0339582	0.386044
13626	Eed	866.493	0.796292	0.375629	2.11989	0.0340154	0.386044
72723	Zfp74	409.365	-0.808333	0.381457	-2.11907	0.0340849	0.386044
73061	Cldn34c1	334.302	-0.917821	0.433053	-2.11942	0.0340552	0.386044
58222	Rab37	100.345	-1.17247	0.552691	-2.12138	0.03389	0.386044
21838	Thy1	1739.59	0.785226	0.370795	2.11768	0.034202	0.386507
194268	9930104L06Rik	85.5095	1.30374	0.615894	2.11682	0.034275	0.386525
14679	Gnai3	279.193	-0.999024	0.472024	-2.11647	0.0343051	0.386525
75538	Fam71e1	56.3977	-1.30333	0.615812	-2.11644	0.0343072	0.386525
59050	Nsa2	100.892	1.30013	0.614942	2.11424	0.0344949	0.386696
101401	Adamts9	110.197	1.22867	0.58079	2.11552	0.0343855	0.386696
12418	Cbx4	110.247	1.18505	0.560368	2.11478	0.0344491	0.386696
76438	Rftn1	477.127	1.07802	0.509632	2.11529	0.034405	0.386696
20411	Sorbs1	2533.45	-0.575785	0.272327	-2.11432	0.0344881	0.386696
53598	Dctn3	256.805	-0.992734	0.469836	-2.11294	0.0346062	0.387446
22693	Zfp30	60.8533	-1.23818	0.586079	-2.11265	0.0346311	0.387446
57170	Dolpp1	528.855	0.785074	0.371712	2.11205	0.0346821	0.38763
100503890	Pet100	379.872	0.93949	0.445422	2.10921	0.0349261	0.38958
234373	Sugp2	1036.58	0.684993	0.324724	2.10946	0.0349047	0.38958
18764	Pkd2	985.015	-0.693806	0.329125	-2.10803	0.0350282	0.390329
22165	Txk	69.4735	-1.22038	0.579165	-2.10714	0.0351054	0.390801
71974	Prmt3	1251.49	-0.813556	0.386205	-2.10654	0.0351575	0.390992
71338	Tprg	60.4425	1.17987	0.56035	2.1056	0.0352393	0.391513
109754	Cyb5r3	51.7612	1.28685	0.611296	2.10512	0.0352805	0.391582
20103	Rps5	33.9141	1.29444	0.616266	2.10045	0.0356893	0.392003
243846	Ccdc9	160.356	1.23296	0.586197	2.10332	0.0354379	0.392003
100041290	D4Ertd617e	262.345	1.14342	0.54441	2.10029	0.0357035	0.392003
268567	Tmem229b	457.437	1.04242	0.495897	2.1021	0.0355449	0.392003
13033	Ctsd	239.79	0.977894	0.465032	2.10285	0.0354786	0.392003
330050	Fam185a	826.801	0.907972	0.431937	2.1021	0.0355448	0.392003
228869	Ncoa5	952.367	0.708358	0.337087	2.10141	0.0356053	0.392003
20975	Synj2	2630.9	0.66867	0.318275	2.10092	0.0356483	0.392003
218214	Kdm1b	316.775	-0.912929	0.434459	-2.1013	0.0356145	0.392003
233545	Emsy	904.871	-1.08967	0.51809	-2.10324	0.035445	0.392003
241322	Zbtb6	59.5599	-1.29117	0.614443	-2.10136	0.0356091	0.392003
57746	Piwil2	64.5115	1.23984	0.590697	2.09894	0.0358218	0.392148
13169	Dbnl	325.185	-1.06787	0.508751	-2.09901	0.0358161	0.392148
66401	Nudt2	44.5098	-1.27883	0.609128	-2.09944	0.0357782	0.392148
381287	A530032D15Rik	56.9784	1.19393	0.56897	2.09841	0.0358687	0.392279
19216	Ptger1	34.6783	1.226	0.584591	2.0972	0.0359759	0.392666
12570	Cdk5r2	92.8371	1.20753	0.576104	2.09603	0.0360794	0.392666
77782	Polq	204.455	-1.14898	0.548066	-2.09643	0.0360445	0.392666
211286	Cln5	80.3214	-1.28489	0.612747	-2.09694	0.035999	0.392666
15114	Hap1	31.7874	-1.29248	0.616413	-2.09678	0.0360132	0.392666
15980	Ifngr2	286.415	0.922497	0.440763	2.09295	0.0363534	0.39488
72787	Ndc1	292.993	-1.10473	0.527811	-2.09303	0.0363463	0.39488
76799	Tmem234	686.58	0.718046	0.343294	2.09164	0.0364711	0.395775
66629	Golph3	1317.07	1.00003	0.478336	2.09063	0.0365608	0.396269
15488	Hsd17b4	932.764	-0.746911	0.357316	-2.09034	0.0365874	0.396269
104174	Gldc	50.6761	1.27793	0.612464	2.08655	0.0369293	0.396539
18185	Nrl	43.1366	1.25981	0.603521	2.08743	0.0368496	0.396539
224022	Slc7a4	46.7054	1.25464	0.601981	2.08419	0.0371433	0.396539
80733	Car15	230.709	1.23535	0.592042	2.08659	0.0369253	0.396539
14807	Grik3	76.9284	1.22106	0.585663	2.08492	0.0370764	0.396539
432855	Zfhx2os	25.2142	1.16941	0.560336	2.08698	0.0368902	0.396539
245902	Ccdc15	535.24	1.1563	0.554023	2.0871	0.0368788	0.396539
83435	Plekha3	238.475	1.10935	0.531392	2.08762	0.0368318	0.396539
14772	Grk4	329.819	1.09175	0.523781	2.08437	0.0371263	0.396539
16522	Kcnj6	346.381	0.96548	0.463045	2.08507	0.0370633	0.396539
234797	6430548M08Rik	1230.89	0.937387	0.449091	2.0873	0.036861	0.396539
27428	Shroom3	526.964	0.752047	0.360456	2.08638	0.0369443	0.396539
239273	Abcc4	428.458	-0.832321	0.399351	-2.08418	0.0371434	0.396539
269585	Zscan20	178.791	-1.21415	0.582151	-2.08563	0.0370125	0.396539
55949	Eef1b2	45.8385	-1.2857	0.616389	-2.08586	0.0369916	0.396539
70047	Trnt1	204.605	-1.07601	0.51642	-2.08359	0.0371979	0.396742
20474	Six4	70.363	1.27512	0.613121	2.07972	0.0375512	0.396882
71567	Mcm9	553.305	1.27416	0.614493	2.07352	0.0381243	0.396882
207819	4930539E08Rik	43.9847	1.25056	0.601113	2.08041	0.0374881	0.396882
69454	Clic3	47.3604	1.2503	0.600849	2.08089	0.0374437	0.396882
66078	Tsen34	53.1186	1.24012	0.5966	2.07865	0.0376499	0.396882
66682	Trappc5	112.199	1.22064	0.588121	2.07549	0.0379411	0.396882
319973	A630077J23Rik	70.3296	1.18807	0.570698	2.08179	0.0373616	0.396882
77595	Nup210l	428.898	1.06044	0.511182	2.07449	0.0380341	0.396882
142682	Zcchc14	1819.58	1.05811	0.510252	2.0737	0.0381073	0.396882
67099	Mettl21a	161.428	1.01047	0.487033	2.07474	0.0380106	0.396882
269966	Nup98	3349.81	0.985681	0.475474	2.07305	0.0381679	0.396882
99010	Lpcat4	3642.77	0.973343	0.468434	2.07787	0.0377218	0.396882
22722	Zfp64	375.604	0.92364	0.443982	2.08035	0.0374931	0.396882
329559	Zfp335	421.617	0.865524	0.416384	2.07867	0.0376478	0.396882
100503085	Klhl3	2329.49	0.658681	0.317658	2.07356	0.0381205	0.396882
170823	Glmn	1237.56	-0.631372	0.303813	-2.07816	0.0376947	0.396882
18004	Nek1	4018.43	-0.656201	0.315268	-2.08141	0.0373965	0.396882
378466	Gm10033	729.382	-0.757987	0.364879	-2.07737	0.0377677	0.396882
12769	Ccr9	679.155	-0.796912	0.383646	-2.07721	0.0377824	0.396882
12424	Cck	484.266	-0.818877	0.394549	-2.07548	0.0379423	0.396882
224481	Tfb1m	234.368	-1.01318	0.48799	-2.07623	0.0378725	0.396882
14251	Flot1	343.639	-1.11917	0.538882	-2.07683	0.0378175	0.396882
68859	Smim1	25.3085	-1.15857	0.558863	-2.07309	0.0381639	0.396882
279561	Wnk3	364.435	-1.17741	0.566098	-2.07988	0.0375369	0.396882
109212	Pimreg	27.66	-1.23683	0.59662	-2.07306	0.0381669	0.396882
78088	Sowahb	106.848	-1.26489	0.607401	-2.08246	0.0373001	0.396882
69260	Ing2	46.9186	-1.28025	0.614835	-2.08227	0.0373182	0.396882
329777	Pigk	208.978	1.24879	0.603003	2.07095	0.0383632	0.398069
23872	Ets2	150.537	1.20262	0.580784	2.07068	0.0383886	0.398069
240066	Zfp870	48.8809	-1.25066	0.603768	-2.07142	0.0383196	0.398069
66645	Pspc1	2477.48	-0.577134	0.278811	-2.06998	0.0384541	0.398379
332934	Zmynd12	76.937	1.27535	0.616427	2.06894	0.0385517	0.399021
78286	Nav2	160.453	1.27263	0.615319	2.06824	0.0386171	0.399089
320806	Gfm2	102.108	1.2707	0.614988	2.06622	0.0388074	0.399089
28106	Mydgf	255.656	1.13062	0.547464	2.06519	0.0389048	0.399089
72844	Kctd17	825.535	1.02254	0.494542	2.06766	0.0386719	0.399089
218194	Phactr1	333.823	0.896432	0.43405	2.06527	0.0388972	0.399089
77323	9430041J12Rik	2279.75	0.72308	0.350145	2.06509	0.0389146	0.399089
252870	Usp7	2367.78	-0.663812	0.320997	-2.06797	0.038643	0.399089
14194	Fh1	402.808	-0.778673	0.3767	-2.06709	0.0387255	0.399089
74737	Pcf11	651.04	-0.950078	0.459816	-2.06621	0.0388083	0.399089
232491	Pyroxd1	113.446	-1.15308	0.558198	-2.06571	0.0388554	0.399089
226407	Rab3gap1	1872.96	-0.729283	0.353279	-2.06432	0.0389871	0.399451
16398	Itga2	44.8173	-1.25564	0.608365	-2.06396	0.0390213	0.399451
67841	Atg3	532.495	-0.89151	0.432166	-2.06289	0.0391231	0.399763
66070	Cwc15	145.743	-1.13803	0.551649	-2.06295	0.0391171	0.399763
12412	Cbx1	429.26	1.2534	0.607962	2.06164	0.0392417	0.400383
213326	Scyl2	1413.48	0.766139	0.371641	2.0615	0.0392553	0.400383
19725	Rfx2	31.3003	-1.25512	0.608961	-2.06109	0.0392942	0.400415
19377	Rai1	6956.93	0.766556	0.372233	2.05934	0.0394613	0.401752
217517	Stxbp6	168.404	1.24227	0.604021	2.05666	0.0397185	0.403271
207740	Ubald1	275.164	1.12575	0.547267	2.05704	0.039682	0.403271
15212	Hexb	4668.52	0.837831	0.407311	2.05698	0.0396879	0.403271
54601	Foxo4	23.8626	1.2487	0.607274	2.05623	0.0397601	0.403328
622320	Kctd21	293.158	1.10243	0.536368	2.05535	0.039845	0.403822
627049	Zfp800	277.24	-0.862497	0.419834	-2.05438	0.039939	0.40441
76073	Pcgf5	664.654	0.685975	0.334107	2.05316	0.0400571	0.404621
100502987	Gm17066	452.138	-1.10847	0.539918	-2.05304	0.0400683	0.404621
73062	Ppp1r16a	245.245	-1.12767	0.549245	-2.05314	0.0400594	0.404621
229011	Samd10	66.5638	1.2035	0.586939	2.05046	0.0403195	0.405331
16880	Lifr	345.784	0.945096	0.460828	2.05086	0.0402802	0.405331
319518	Pdpr	874.462	0.667531	0.325531	2.05059	0.0403071	0.405331
12929	Crkl	1976.57	0.601425	0.293243	2.05095	0.0402721	0.405331
66353	Riiad1	219.334	-1.16243	0.566655	-2.05139	0.0402286	0.405331
14077	Fabp3	68.565	1.2632	0.616447	2.04916	0.0404469	0.405564
140709	Col26a1	108.581	1.26149	0.615443	2.04973	0.0403909	0.405564
57370	B4galt3	443.955	1.08375	0.528895	2.04909	0.0404532	0.405564
233900	Rnf40	343.253	0.836827	0.408533	2.04837	0.0405238	0.405564
665775	Bod1l	111.423	-1.23557	0.603176	-2.04843	0.0405176	0.405564
67426	Coq8a	189.777	1.11905	0.546879	2.04625	0.0407317	0.407281
13430	Dnm2	2663.09	0.702344	0.343321	2.04574	0.0407823	0.407423
14455	Gas5	283.686	-0.902069	0.441245	-2.04437	0.0409168	0.408039
72555	Shisa9	83.9049	-1.23289	0.603004	-2.04458	0.0408963	0.408039
76580	Mib2	332.396	1.07477	0.526047	2.04311	0.0410417	0.408556
107003	A330093E20Rik	294.445	-0.825206	0.403879	-2.0432	0.0410326	0.408556
77920	A330102I10Rik	50.3772	1.24638	0.610709	2.04088	0.0412629	0.410029
70620	Ube2v2	724.299	-0.861114	0.421904	-2.04102	0.041249	0.410029
230822	Ncmap	95.2039	1.21228	0.594261	2.03997	0.0413531	0.410198
22223	Uchl1	445.252	1.13886	0.55826	2.04003	0.0413476	0.410198
217463	Snx13	2436.86	-0.580491	0.284965	-2.03706	0.041644	0.411988
28113	Tinf2	101.126	-1.18885	0.58357	-2.03721	0.0416295	0.411988
209354	Eif2b1	63.381	-1.24079	0.608931	-2.03766	0.0415843	0.411988
19023	Ppef2	644.414	1.17623	0.577694	2.03607	0.0417431	0.412484
224250	Cldnd1	857.617	0.970443	0.476742	2.03557	0.0417931	0.412484
67269	Agtpbp1	5810.9	-0.532747	0.261733	-2.03546	0.0418045	0.412484
243931	Tshz3	1019.42	0.90932	0.446833	2.03504	0.0418473	0.412542
100039055	Gm16404	81.157	1.23341	0.606553	2.03348	0.0420037	0.412858
20700	Serpina1a	51.2312	1.21589	0.597968	2.03337	0.0420152	0.412858
71702	Cdc5l	26.5637	1.13062	0.556133	2.03301	0.0420519	0.412858
67123	Ubap1	1215.46	0.88494	0.435311	2.03289	0.0420637	0.412858
67383	Carnmt1	709.407	-1.07327	0.527741	-2.03371	0.0419807	0.412858
11429	Aco2	2578.44	0.538103	0.264852	2.03172	0.0421825	0.413662
20658	Son	3419.14	-0.565282	0.278466	-2.02998	0.0423583	0.415022
13876	Erg	65.1844	1.25028	0.616115	2.02929	0.0424286	0.415055
63913	Fam129a	157.335	1.02333	0.504296	2.02922	0.0424358	0.415055
20529	Slc31a1	203.853	-1.24775	0.615006	-2.02884	0.0424744	0.41507
18632	Pex11b	108.834	1.11985	0.552169	2.02809	0.0425506	0.415453
27374	Prmt5	60.029	1.20991	0.597417	2.02523	0.0428438	0.417341
209361	Taf3	1537.62	0.772723	0.381639	2.02475	0.0428931	0.417341
19070	Mob4	533.697	-0.814904	0.402265	-2.02579	0.0427864	0.417341
72931	Swi5	118.385	-1.03823	0.512694	-2.02505	0.0428625	0.417341
22658	Pcgf2	131.941	1.22633	0.605816	2.02427	0.0429428	0.417462
14104	Fasn	157.489	1.18622	0.586119	2.02385	0.0429858	0.417473
19268	Ptprf	48.019	1.16365	0.575882	2.02064	0.0433166	0.417473
72140	Cep89	772.824	1.09504	0.541494	2.02226	0.0431491	0.417473
14128	Fcer2a	347.185	0.959393	0.474373	2.02244	0.0431306	0.417473
71678	Brox	394.895	0.781761	0.386884	2.02066	0.0433151	0.417473
68095	Ociad1	778.642	-0.638526	0.315899	-2.0213	0.0432487	0.417473
269800	Zfp384	453.37	-0.810395	0.400781	-2.02204	0.0431723	0.417473
12289	Cacna1d	5358.42	-0.857621	0.424029	-2.02255	0.0431192	0.417473
54156	Egfl6	40.828	-1.21468	0.600959	-2.02123	0.0432561	0.417473
60411	Cenpk	52.4339	-1.24652	0.616409	-2.02223	0.0431529	0.417473
75610	2010109A12Rik	79.0947	1.18572	0.587602	2.01789	0.0436025	0.418114
107605	Rdh1	27.0205	1.11952	0.554866	2.01764	0.0436292	0.418114
78808	Stxbp5	607.403	1.11165	0.550673	2.01872	0.0435163	0.418114
72154	Zfp157	508.867	-0.780313	0.386778	-2.01747	0.0436465	0.418114
94093	Trim33	1815.45	-0.784038	0.388617	-2.01751	0.0436425	0.418114
20624	Eftud2	488.666	-0.927488	0.459245	-2.01959	0.0434257	0.418114
100041581	Zkscan16	51.6212	-1.206	0.597879	-2.01713	0.0436818	0.418114
66462	Rex1bd	35.3655	-1.23729	0.613346	-2.01728	0.0436659	0.418114
244421	Lonrf1	477.639	-0.772195	0.383032	-2.01601	0.0437992	0.418474
52855	Lair1	1019.41	-0.776681	0.385265	-2.01597	0.0438034	0.418474
15926	Idh1	31.2364	-1.24256	0.61644	-2.0157	0.0438316	0.418474
14733	Gpc1	103.33	1.19829	0.595268	2.01303	0.0441113	0.418678
76895	Bicd2	613.206	1.05621	0.524793	2.01262	0.044155	0.418678
74525	Fam234b	721.217	0.859463	0.427084	2.0124	0.0441778	0.418678
218503	Fcho2	1022.58	0.711707	0.353597	2.01276	0.0441395	0.418678
102436	Lars2	6968.22	0.602395	0.299277	2.01283	0.0441324	0.418678
99100	Cep152	257.121	-0.95776	0.475874	-2.01263	0.0441532	0.418678
22682	Zfand5	861.662	-0.968476	0.481281	-2.01229	0.0441894	0.418678
66790	Grtp1	255.499	-1.098	0.545086	-2.01436	0.0439714	0.418678
67031	Upf3a	121.891	-1.19502	0.593252	-2.01435	0.0439727	0.418678
11793	Atg5	717.943	-0.666928	0.331567	-2.01145	0.0442784	0.419167
66520	2610001J05Rik	50.1542	1.19758	0.595566	2.01083	0.0443438	0.419431
69159	Rhebl1	28.5503	1.21907	0.606587	2.00973	0.0444601	0.419822
100273	Osbpl9	4801.48	-0.577569	0.287373	-2.00982	0.0444497	0.419822
18628	Per3	826.277	1.17393	0.584503	2.00842	0.0445983	0.420528
108030	Lin7a	143.564	1.09064	0.543061	2.00831	0.04461	0.420528
29806	Limd1	479.458	1.21786	0.607112	2.00599	0.0448574	0.420736
100043582	AU016765	77.8039	1.10873	0.552651	2.00621	0.0448337	0.420736
16543	Mdfic	37.5914	-1.11913	0.557701	-2.00669	0.0447827	0.420736
192970	Dhrs11	68.7086	-1.15383	0.574722	-2.00763	0.0446822	0.420736
16401	Itga4	24.7556	-1.15793	0.577088	-2.0065	0.0448028	0.420736
402767	A830052D11Rik	75.7255	-1.21385	0.605113	-2.006	0.0448568	0.420736
14598	Ggt1	25.4281	1.13985	0.568438	2.00523	0.0449383	0.421142
56530	Cnpy2	32.4898	1.21136	0.604911	2.00254	0.0452265	0.422949
73910	Arhgap18	72.6227	1.20215	0.600364	2.00237	0.0452445	0.422949
20679	Sox6	128.381	1.20098	0.599605	2.00294	0.0451834	0.422949
226139	Cox15	298.503	-0.903603	0.451396	-2.0018	0.0453066	0.423176
84652	Fam126a	241.719	1.21565	0.607603	2.00073	0.0454216	0.423367
75050	Kif27	211.019	0.94955	0.474805	1.99987	0.045514	0.423367
230594	Tut4	1401.25	-0.60861	0.304321	-1.9999	0.0455114	0.423367
70998	Phf6	544.011	-0.706085	0.352973	-2.00039	0.0454579	0.423367
232566	Amn1	373.325	-0.922772	0.46142	-1.99985	0.0455161	0.423367
14536	Nr6a1	5751.25	-0.499054	0.24975	-1.99822	0.0456933	0.424664
18131	Notch3	74.9467	1.22596	0.613915	1.99696	0.0458298	0.425578
320485	B230312C02Rik	67.7402	1.22735	0.614737	1.99655	0.0458746	0.425642
215474	Sec22c	236.723	1.06546	0.53381	1.99595	0.0459397	0.425893
26913	Gprin1	34.6877	1.21257	0.60802	1.9943	0.0461196	0.42603
257632	Nod2	49.6365	1.12208	0.562807	1.99372	0.0461828	0.42603
70885	Ints10	1169.23	0.97706	0.490005	1.99398	0.0461545	0.42603
12043	Bcl2	1134.71	0.948905	0.475835	1.99419	0.0461313	0.42603
70884	Ccdc81	155.274	-1.01302	0.507717	-1.99524	0.0460171	0.42603
72123	Ccdc71l	45.6904	-1.20384	0.603727	-1.99402	0.0461504	0.42603
73122	Tgfbrap1	718.131	-0.67117	0.337006	-1.99157	0.0464188	0.427503
72098	Tmem68	450.716	-0.724406	0.363691	-1.99182	0.046391	0.427503
243043	Kctd8	681.811	0.768693	0.38617	1.99056	0.0465298	0.428174
66868	Mfsd1	119.586	-1.18347	0.595052	-1.98885	0.0467178	0.42955
11539	Adora1	59.6753	1.21302	0.611623	1.98328	0.0473366	0.431141
381406	Trp53rka	65.9745	1.19081	0.599806	1.98533	0.047108	0.431141
23893	Grem2	50.7275	1.18202	0.595997	1.98327	0.0473372	0.431141
110074	Dut	197.213	1.16997	0.589963	1.98313	0.0473527	0.431141
171588	Gm38402	21.8446	1.0973	0.552725	1.98525	0.0471167	0.431141
67288	Srek1ip1	484.022	1.05916	0.533788	1.98422	0.0472308	0.431141
233912	Armc5	176.364	0.934052	0.470427	1.98554	0.0470844	0.431141
67534	Ttll4	5102.86	0.740879	0.37336	1.98435	0.0472163	0.431141
26921	Map4k4	4080.97	0.527925	0.266	1.98468	0.0471803	0.431141
414108	9230114K14Rik	97.781	-1.06181	0.535296	-1.9836	0.0473005	0.431141
619327	G630093K05Rik	106.596	-1.17618	0.592296	-1.98579	0.0470564	0.431141
237436	Gas2l3	103.479	-1.18698	0.597657	-1.98606	0.047027	0.431141
76582	Ipo11	1607.04	-0.580909	0.293101	-1.98194	0.0474861	0.431653
109333	Pkn2	1125.22	-0.816505	0.411946	-1.98207	0.0474719	0.431653
233887	Zfp553	1540.74	0.57751	0.292024	1.97761	0.0479725	0.435721
102580	Alg9	508.109	-0.804955	0.407122	-1.97718	0.0480209	0.435807
101358	Fbxl14	32.5257	1.14178	0.577954	1.97555	0.0482058	0.436072
235956	Zfp825	759.873	-0.737613	0.373315	-1.97584	0.0481725	0.436072
66935	Cir1	315.07	-0.826365	0.418162	-1.97618	0.0481339	0.436072
100042498	Mir22hg	412.171	-1.17419	0.594265	-1.97587	0.048169	0.436072
19106	Eif2ak2	50.2749	1.2164	0.61632	1.97364	0.0484222	0.43666
319616	5930412G12Rik	269.152	0.97473	0.49381	1.9739	0.0483933	0.43666
269473	Lrig2	1766.86	0.916379	0.464398	1.97326	0.0484658	0.43666
208618	Etl4	59170.6	-0.675194	0.342146	-1.97341	0.0484487	0.43666
21936	Tnfrsf18	100.447	-1.18427	0.600022	-1.9737	0.0484157	0.43666
71710	Lrrcc1	369.903	-0.752963	0.381771	-1.97229	0.0485769	0.43731
19299	Abcd3	1858.58	-0.575983	0.292187	-1.97128	0.0486915	0.437823
237775	Zfp867	89.3764	-1.18466	0.601012	-1.9711	0.0487122	0.437823
69350	1700003G18Rik	26.6321	1.15929	0.588591	1.96959	0.0488849	0.438798
78232	Trappc6b	598.766	-0.845536	0.429321	-1.96947	0.048899	0.438798
214944	Mob3b	32.3084	1.21285	0.616152	1.96842	0.0490195	0.439527
108705	Pttg1ip	611.349	0.959531	0.487695	1.96748	0.0491275	0.439791
58996	Arhgap23	2806.2	0.522321	0.265443	1.96773	0.0490989	0.439791
22644	Rnf103	122.953	-1.00952	0.513388	-1.96638	0.0492544	0.440575
243937	Zfp536	3034.11	0.661678	0.336637	1.96555	0.0493503	0.441081
233490	Crebzf	357.215	-0.824537	0.419586	-1.96512	0.0494002	0.441175
13716	Ell	686.336	0.734042	0.373718	1.96416	0.0495114	0.441656
230779	Serinc2	9828.07	-0.60176	0.306399	-1.96398	0.049533	0.441656
224997	Dlgap1	5424.66	0.776516	0.395597	1.9629	0.0496583	0.442421
22371	Vwf	133.656	1.20683	0.615108	1.96198	0.0497645	0.4427
14866	Gstm5	104.329	1.12031	0.571042	1.96187	0.0497772	0.4427
15251	Hif1a	506.02	-0.836794	0.426586	-1.96161	0.0498082	0.4427
71000	4931440J10Rik	289.911	0.919477	0.468831	1.96121	0.0498544	0.442759
20192	Ryr3	46.3793	1.19973	0.611935	1.96055	0.0499316	0.443093
100504262	A730020E08Rik	21.4246	1.35612	0.594427	2.28139	0.0225253	NA
224904	2410015M20Rik	16.1784	1.16279	0.569117	2.04314	0.0410386	NA
14265	Fmr1	20.9692	1.15252	0.558991	2.06178	0.0392286	NA
66048	Emc6	19.3013	-1.16537	0.568338	-2.05048	0.0403175	NA
70673	Prdm16	18.2145	-1.31238	0.588858	-2.22868	0.0258351	NA
75659	Wdr54	19.1852	-1.47476	0.597818	-2.4669	0.0136288	NA
